# Supplementary material for: Discovery of aromadendrane anologues from the marine-derived fungus Scedosporium dehoogii F41-4 by NMR-guided isolation
Source: Royal Society of Chemistry journal article supplement (doi:10.1039/c6ra21142a), 2016-01-01

## Supporting Information

### Discovery of aromadendrane analogues from the marine-derived fungus *Scedosporium dehoogii* F41-4 by NMR-guided isolation

Kun-Chao Hu,<sup>ad</sup> Meng-Yang Xu,<sup>a</sup> Hou-Jin Li,<sup>b</sup> Jie Yuan,<sup>c</sup> Ge Tang,<sup>c</sup> Jun Xu,<sup>a</sup> De-Po

Yang,<sup>ad</sup> Wen-Jian Lan<sup>\*ad</sup>

<sup>a</sup>School of Pharmaceutical Sciences, Sun Yat-sen University, Guangzhou 510006, China

<sup>b</sup>School of Chemistry and Chemical Engineering, Sun Yat-sen University, Guangzhou 510275, China

<sup>c</sup>Zhongshan School of Medicine, Sun Yat-sen University, Guangzhou 510080, China.

<sup>d</sup>Guangdong Technology Research Center for Advanced Chinese Medicine, Guangzhou 510006, China

To whom correspondence should be addressed: [lanwj@mail.sysu.edu.cn](mailto:lanwj@mail.sysu.edu.cn)

### List of Contents

|                                                                                                                         |    |
|-------------------------------------------------------------------------------------------------------------------------|----|
| <b>Figure S1.</b> The most stable ECD calculation conformers of <b>1-3, 6-8</b> .....                                   | 1  |
| <b>Figure S2.</b> Comparison of the experimental ECD and the calculated ECD spectra of <b>2-3, 6-7</b> .....            | 2  |
| <b>Figure S3.</b> HR-ESI-MS spectrum of scedogiine A ( <b>1</b> ).....                                                  | 3  |
| <b>Figure S4.</b> <sup>1</sup> H-NMR spectrum of scedogiine A ( <b>1</b> ) in CDCl <sub>3</sub> (400MHz).....           | 4  |
| <b>Figure S5.</b> <sup>13</sup> C NMR spectrum of scedogiine A ( <b>1</b> ) in CDCl <sub>3</sub> (100MHz).....          | 5  |
| <b>Figure S6.</b> DEPT 135 spectrum of scedogiine A ( <b>1</b> ) in CDCl <sub>3</sub> (100MHz).....                     | 6  |
| <b>Figure S7.</b> HMQC spectrum of scedogiine A ( <b>1</b> ) in CDCl <sub>3</sub> .....                                 | 7  |
| <b>Figure S8.</b> <sup>1</sup> H- <sup>1</sup> H COSY spectrum of scedogiine A ( <b>1</b> ) in CDCl <sub>3</sub> .....  | 8  |
| <b>Figure S9.</b> HMBC spectrum of scedogiine A ( <b>1</b> ) in CDCl <sub>3</sub> .....                                 | 9  |
| <b>Figure S10.</b> NOESY spectrum of scedogiine A ( <b>1</b> ) in CDCl <sub>3</sub> .....                               | 10 |
| <b>Figure S11.</b> <sup>1</sup> H-NMR spectrum of scedogiine A ( <b>1</b> ) in acetone-d <sub>6</sub> (400MHz).....     | 11 |
| <b>Figure S12.</b> <sup>1</sup> H-NMR spectrum of scedogiine A ( <b>1</b> ) in CD <sub>3</sub> OD (400MHz).....         | 12 |
| <b>Figure S13.</b> HR-ESI-MS spectrum of scedogiine B ( <b>2</b> ).....                                                 | 13 |
| <b>Figure S14.</b> <sup>1</sup> H-NMR spectrum of scedogiine B ( <b>2</b> ) in CDCl <sub>3</sub> (400MHz).....          | 14 |
| <b>Figure S15.</b> <sup>13</sup> C NMR spectrum of scedogiine B ( <b>2</b> ) in CDCl <sub>3</sub> (100MHz).....         | 15 |
| <b>Figure S16.</b> DEPT 135 spectrum of scedogiine B ( <b>2</b> ) in CDCl <sub>3</sub> (100MHz).....                    | 16 |
| <b>Figure S17.</b> HMQC spectrum of scedogiine B ( <b>2</b> ) in CDCl <sub>3</sub> .....                                | 17 |
| <b>Figure S18.</b> <sup>1</sup> H- <sup>1</sup> H COSY spectrum of scedogiine B ( <b>2</b> ) in CDCl <sub>3</sub> ..... | 18 |
| <b>Figure S19.</b> HMBC spectrum of scedogiine B ( <b>2</b> ) in CDCl <sub>3</sub> .....                                | 19 |
| <b>Figure S20.</b> NOESY spectrum of scedogiine B ( <b>2</b> ) in CDCl <sub>3</sub> .....                               | 20 |

|                                                                                                                         |    |
|-------------------------------------------------------------------------------------------------------------------------|----|
| <b>Figure S21.</b> HR-ESI-MS spectrum of scedogiine C ( <b>3</b> ).....                                                 | 21 |
| <b>Figure S22.</b> <sup>1</sup> H-NMR spectrum of scedogiine C ( <b>3</b> ) in CDCl <sub>3</sub> (400MHz).....          | 22 |
| <b>Figure S23.</b> <sup>13</sup> C NMR spectrum of scedogiine C ( <b>3</b> ) in CDCl <sub>3</sub> (100MHz).....         | 23 |
| <b>Figure S24.</b> DEPT 135 spectrum of scedogiine C ( <b>3</b> ) in CDCl <sub>3</sub> (100MHz).....                    | 24 |
| <b>Figure S25.</b> HMQC spectrum of scedogiine C ( <b>3</b> ) in CDCl <sub>3</sub> .....                                | 25 |
| <b>Figure S26.</b> <sup>1</sup> H- <sup>1</sup> H COSY spectrum of scedogiine C ( <b>3</b> ) in CDCl <sub>3</sub> ..... | 26 |
| <b>Figure S27.</b> HMBC spectrum of scedogiine C ( <b>3</b> ) in CDCl <sub>3</sub> .....                                | 27 |
| <b>Figure S28.</b> NOESY spectrum of scedogiine C ( <b>3</b> ) in CDCl <sub>3</sub> .....                               | 28 |
| <b>Figure S29.</b> <sup>1</sup> H-NMR spectrum of pseuboydone A ( <b>4</b> ) in CDCl <sub>3</sub> (400MHz).....         | 29 |
| <b>Figure S30.</b> <sup>13</sup> C NMR spectrum of pseuboydone A ( <b>4</b> ) in CDCl <sub>3</sub> (100MHz).....        | 30 |
| <b>Figure S31.</b> <sup>1</sup> H-NMR spectrum of pseuboydone B ( <b>5</b> ) in CDCl <sub>3</sub> (400MHz).....         | 31 |
| <b>Figure S32.</b> <sup>13</sup> C NMR spectrum of pseuboydone B ( <b>5</b> ) in CDCl <sub>3</sub> (100MHz).....        | 32 |
| <b>Figure S33.</b> HR-ESI-MS spectrum of scedogiine D ( <b>6</b> ).....                                                 | 33 |
| <b>Figure S34.</b> <sup>1</sup> H-NMR spectrum of scedogiine D ( <b>6</b> ) in CDCl <sub>3</sub> (400MHz).....          | 34 |
| <b>Figure S35.</b> <sup>13</sup> C NMR spectrum of scedogiine D ( <b>6</b> ) in CDCl <sub>3</sub> (100MHz).....         | 35 |
| <b>Figure S36.</b> DEPT 135 spectrum of scedogiine D ( <b>6</b> ) in CDCl <sub>3</sub> (100MHz).....                    | 36 |
| <b>Figure S37.</b> HMQC spectrum of scedogiine D ( <b>6</b> ) in CDCl <sub>3</sub> .....                                | 37 |
| <b>Figure S38.</b> <sup>1</sup> H- <sup>1</sup> H COSY spectrum of scedogiine D ( <b>6</b> ) in CDCl <sub>3</sub> ..... | 38 |
| <b>Figure S39.</b> HMBC spectrum of scedogiine D ( <b>6</b> ) in CDCl <sub>3</sub> .....                                | 39 |
| <b>Figure S40.</b> NOESY spectrum of scedogiine D ( <b>6</b> ) in CDCl <sub>3</sub> .....                               | 40 |
| <b>Figure S41.</b> HR-ESI-MS spectrum of scedogiine E ( <b>7</b> ).....                                                 | 41 |
| <b>Figure S42.</b> <sup>1</sup> H-NMR spectrum of scedogiine E ( <b>7</b> ) in CDCl <sub>3</sub> (400MHz).....          | 42 |
| <b>Figure S43.</b> <sup>13</sup> C NMR spectrum of scedogiine E ( <b>7</b> ) in CDCl <sub>3</sub> (100MHz).....         | 43 |
| <b>Figure S44.</b> DEPT 135 spectrum of scedogiine E ( <b>7</b> ) in CDCl <sub>3</sub> (100MHz).....                    | 44 |
| <b>Figure S45.</b> HMQC spectrum of scedogiine E ( <b>7</b> ) in CDCl <sub>3</sub> .....                                | 45 |
| <b>Figure S46.</b> <sup>1</sup> H- <sup>1</sup> H COSY spectrum of scedogiine E ( <b>7</b> ) in CDCl <sub>3</sub> ..... | 46 |
| <b>Figure S47.</b> HMBC spectrum of scedogiine E ( <b>7</b> ) in CDCl <sub>3</sub> .....                                | 47 |
| <b>Figure S48.</b> NOESY spectrum of scedogiine E ( <b>7</b> ) in CDCl <sub>3</sub> .....                               | 48 |
| <b>Figure S49.</b> HR-ESI-MS spectrum of scedogiine F ( <b>8</b> ).....                                                 | 49 |
| <b>Figure S50.</b> <sup>1</sup> H-NMR spectrum of scedogiine F ( <b>8</b> ) in CDCl <sub>3</sub> (400MHz).....          | 50 |
| <b>Figure S51.</b> <sup>13</sup> C NMR spectrum of scedogiine F ( <b>8</b> ) in CDCl <sub>3</sub> (100MHz).....         | 51 |
| <b>Figure S52.</b> HMQC spectrum of scedogiine F ( <b>8</b> ) in CDCl <sub>3</sub> .....                                | 52 |
| <b>Figure S53.</b> <sup>1</sup> H- <sup>1</sup> H COSY spectrum of scedogiine F ( <b>8</b> ) in CDCl <sub>3</sub> ..... | 53 |
| <b>Figure S54.</b> HMBC spectrum of scedogiine F ( <b>8</b> ) in CDCl <sub>3</sub> .....                                | 54 |
| <b>Figure S55.</b> NOESY spectrum of scedogiine F ( <b>8</b> ) in CDCl <sub>3</sub> .....                               | 55 |
| <b>Figure S56.</b> HR-ESI-MS spectrum of scedogiine G ( <b>9</b> ).....                                                 | 56 |
| <b>Figure S57.</b> <sup>1</sup> H-NMR spectrum of scedogiine G ( <b>9</b> ) in CDCl <sub>3</sub> (400MHz).....          | 57 |
| <b>Figure S58.</b> <sup>13</sup> C NMR spectrum of scedogiine G ( <b>9</b> ) in CDCl <sub>3</sub> (100MHz).....         | 58 |
| <b>Figure S59.</b> DEPT 135 spectrum of scedogiine G ( <b>9</b> ) in CDCl <sub>3</sub> (100MHz).....                    | 59 |
| <b>Figure S60.</b> HMQC spectrum of scedogiine G ( <b>9</b> ) in CDCl <sub>3</sub> .....                                | 60 |
| <b>Figure S61.</b> <sup>1</sup> H- <sup>1</sup> H COSY spectrum of scedogiine G ( <b>9</b> ) in CDCl <sub>3</sub> ..... | 61 |
| <b>Figure S62.</b> HMBC spectrum of scedogiine G ( <b>9</b> ) in CDCl <sub>3</sub> .....                                | 62 |
| <b>Figure S63.</b> NOESY spectrum of scedogiine G ( <b>9</b> ) in CDCl <sub>3</sub> .....                               | 63 |

**FigS1.** The most stable conformers of **1-3**, **6-8** calculated at the B3LYP/6-31+G(d) level. Relative populations are in parentheses.

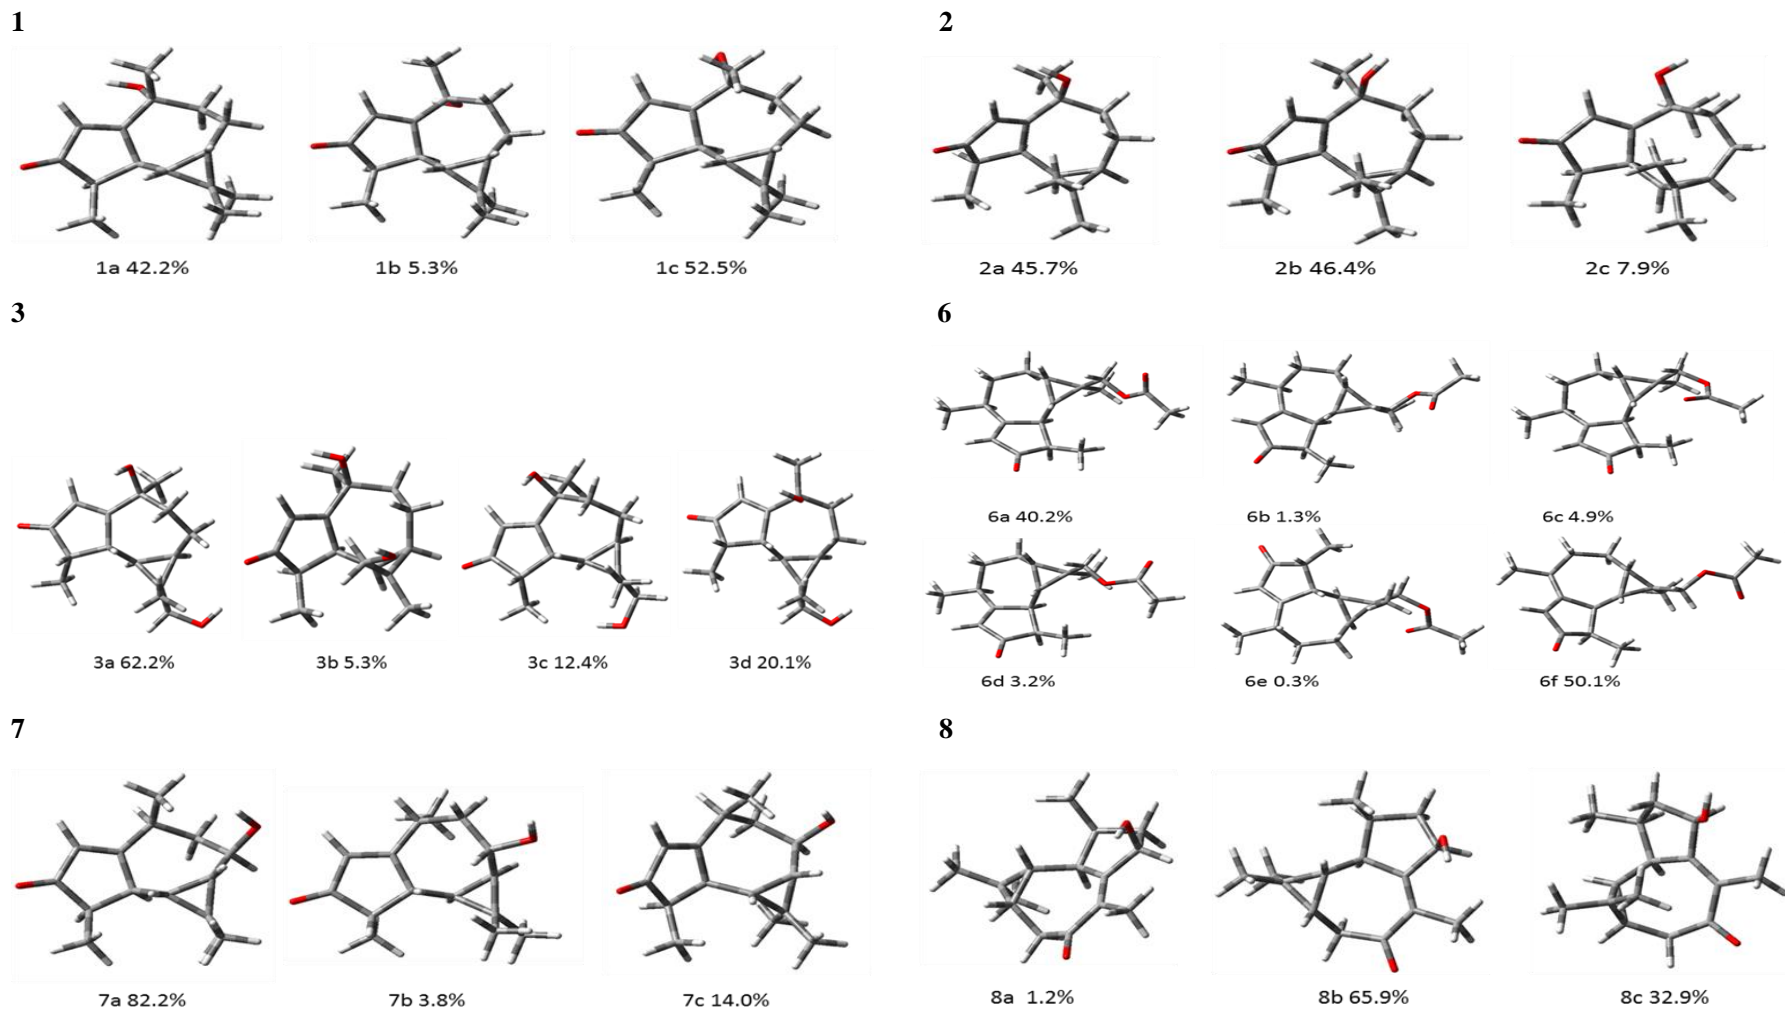

**Figure S2.** Comparison of the experimental ECD and the calculated ECD spectra of **2-3, 6-7**

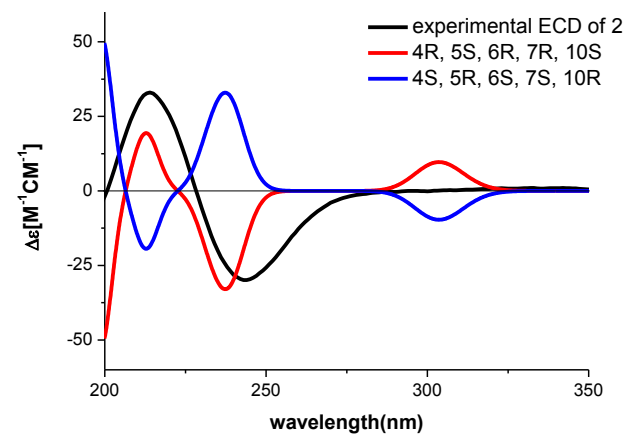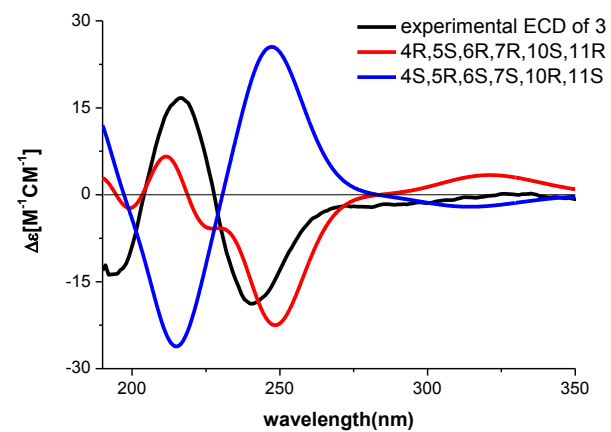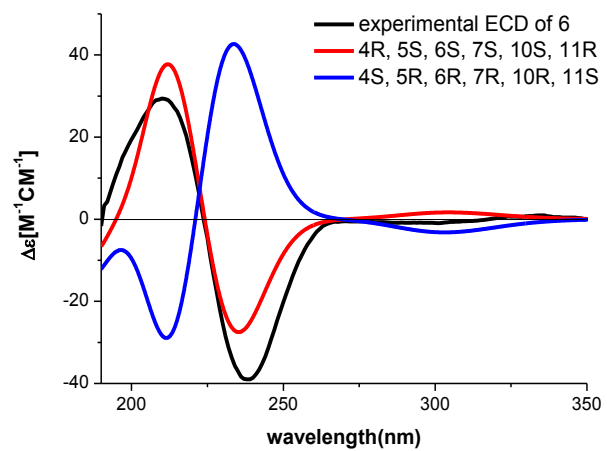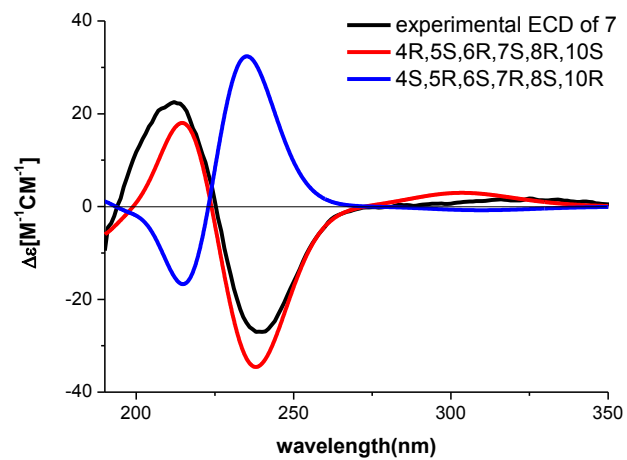

**Figure S3.** HR-ESI-MS spectrum of scedogine A (1)

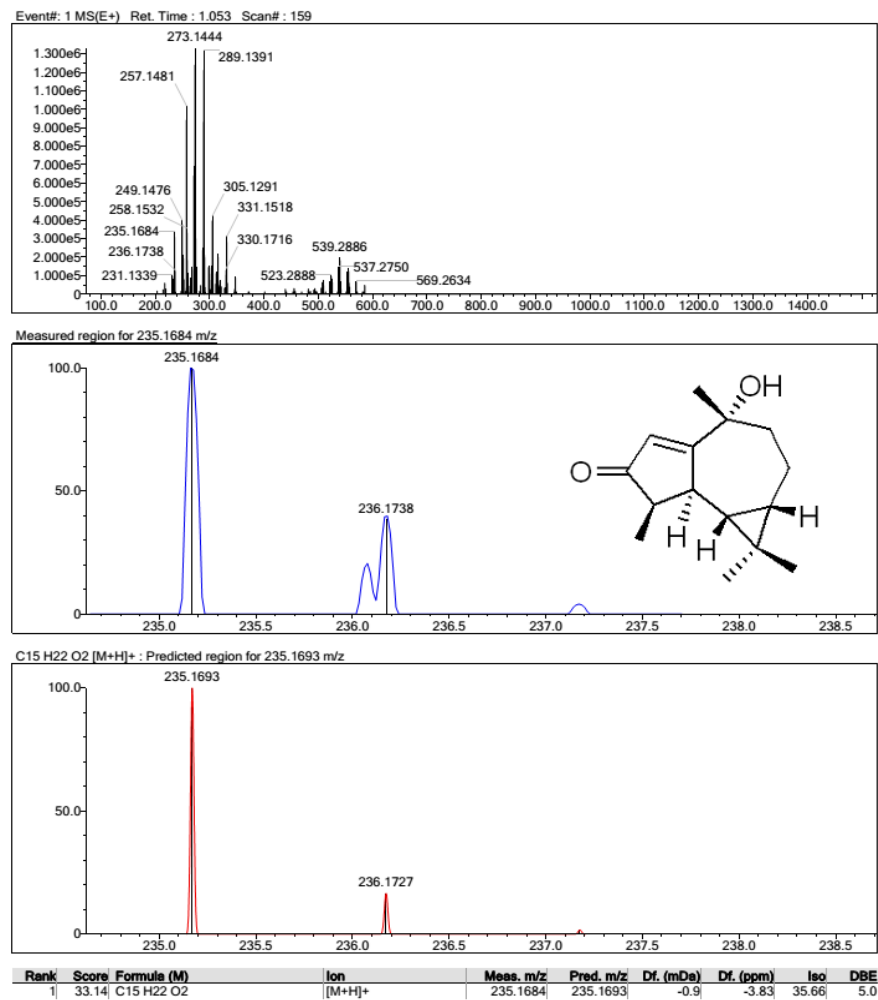

Figure S4.  $^1\text{H-NMR}$  spectrum of scedogiine A (**1**) in  $\text{CDCl}_3$  (400MHz)

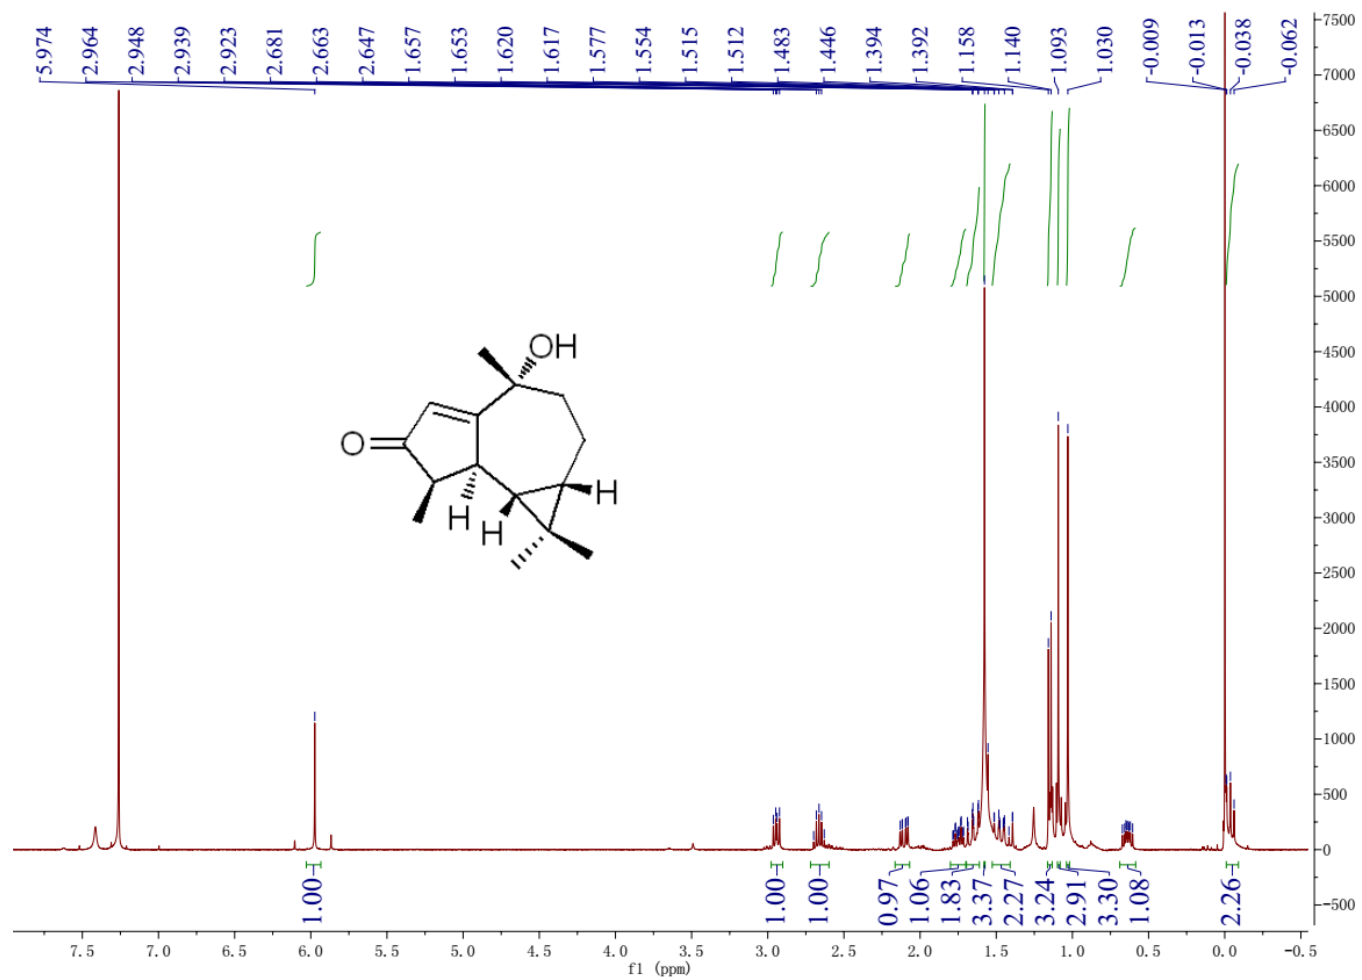

Figure S5.  $^{13}\text{C}$  NMR spectrum of scedogiine A (**1**) in  $\text{CDCl}_3$  (100MHz)

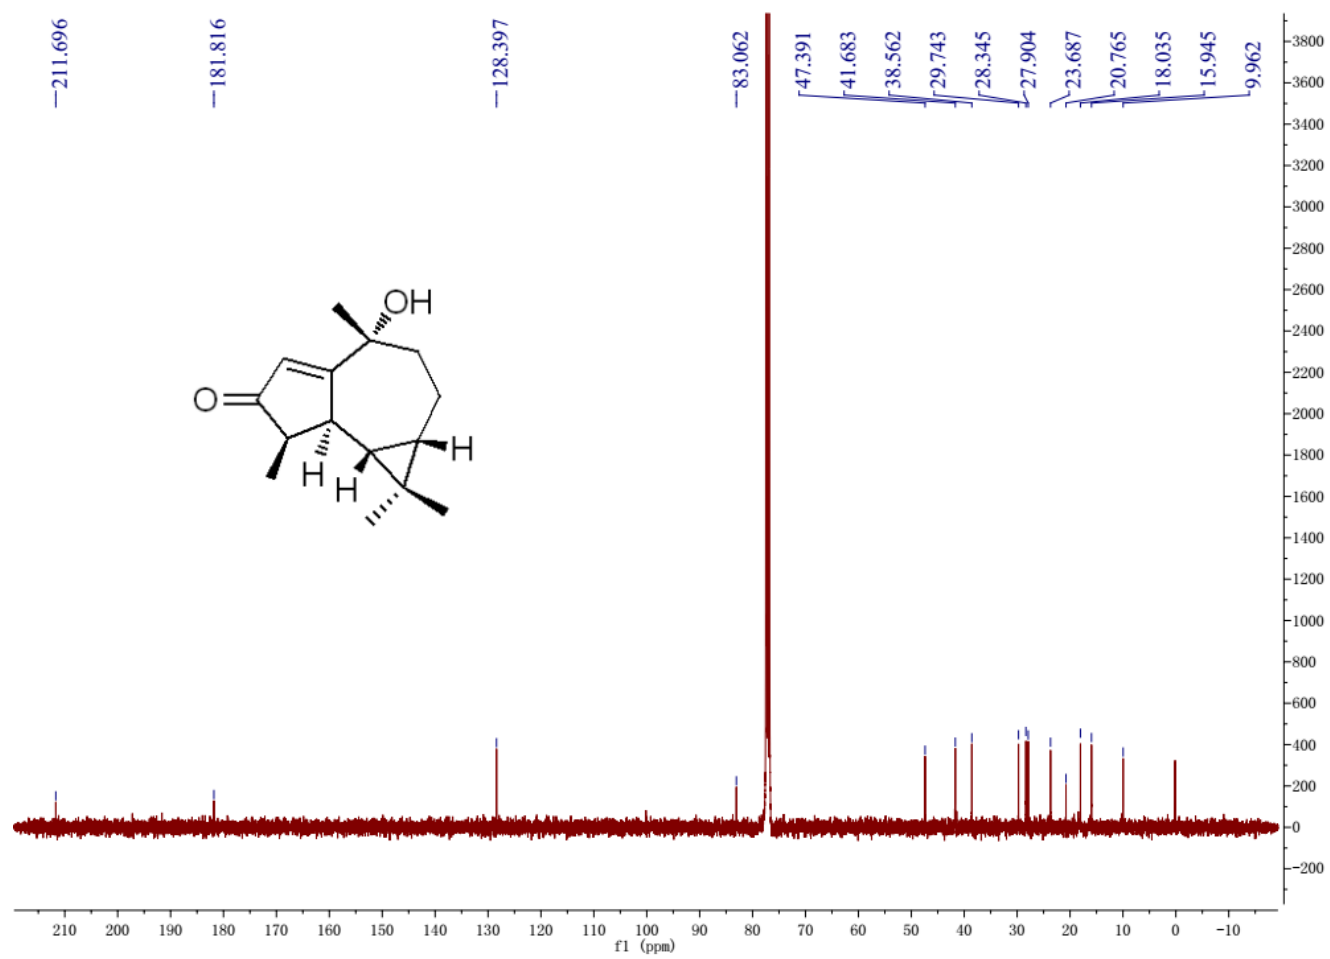

Figure S6. DEPT 135 spectrum of scedogiine A (1) in CDCl<sub>3</sub> (100MHz)

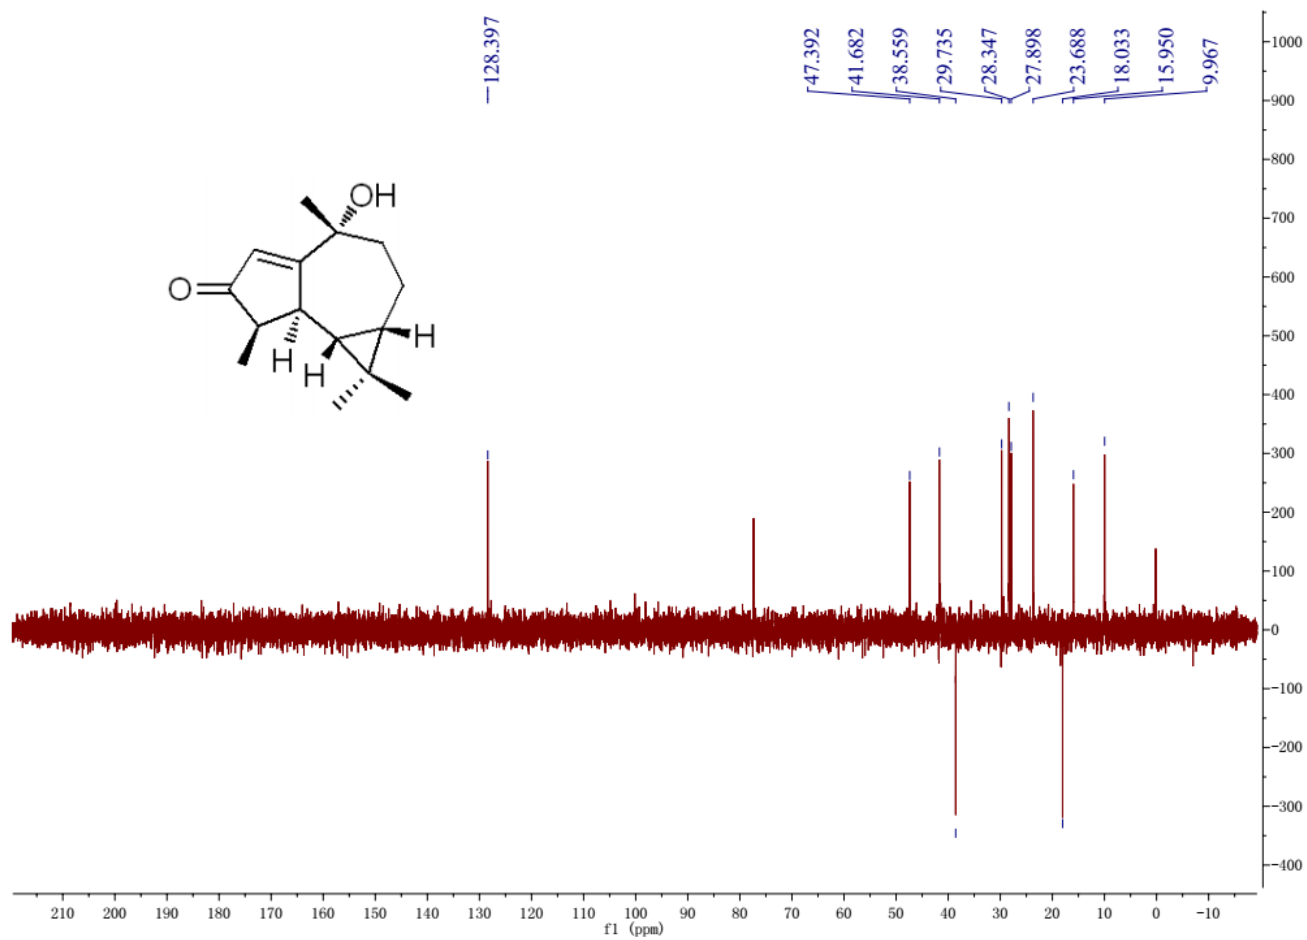



Figure S7. HMQC spectrum of scedogiine A (1) in CDCl<sub>3</sub>

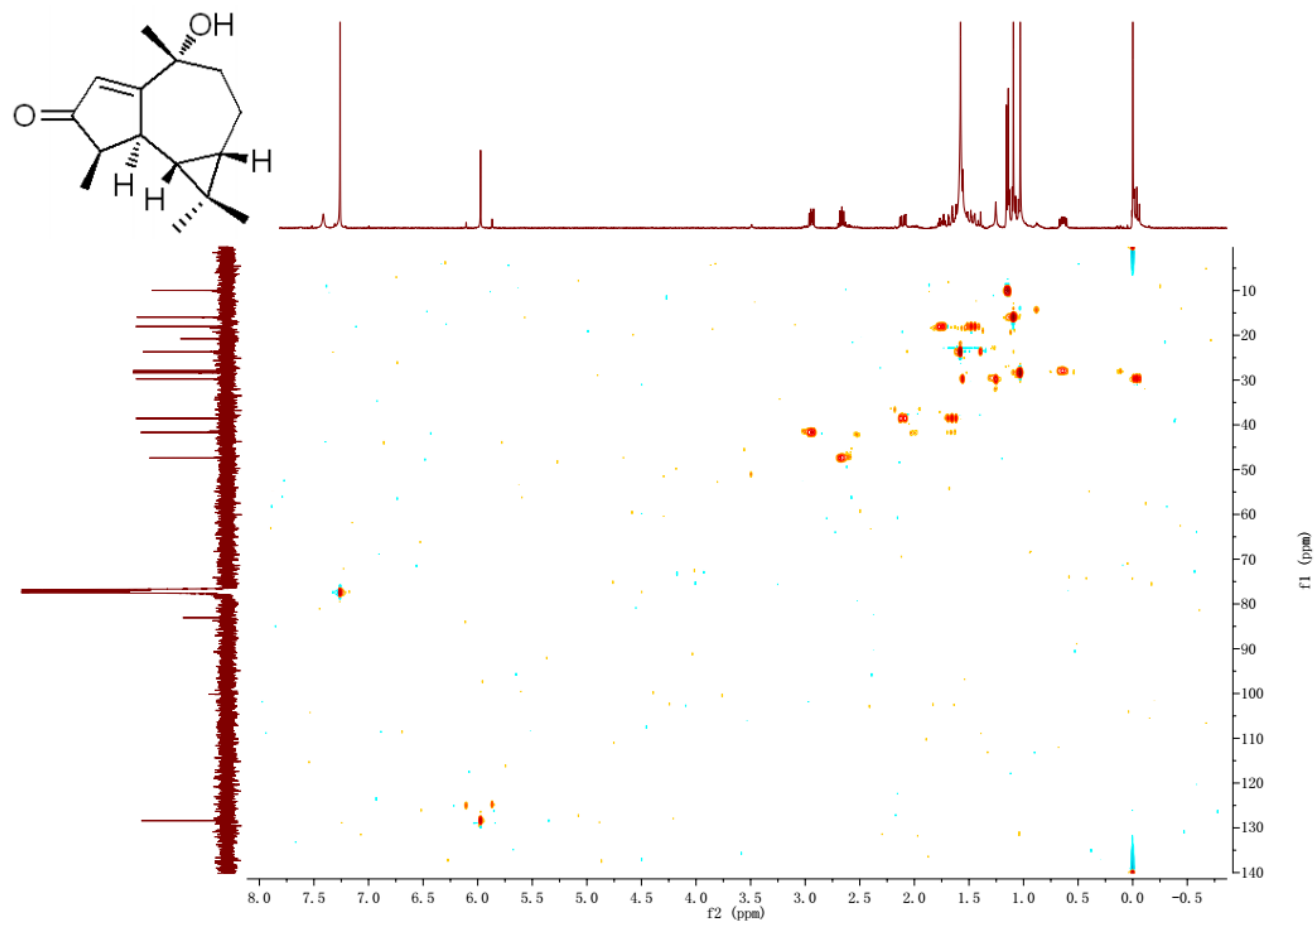

**Figure S8.**  $^1\text{H}$ - $^1\text{H}$  COSY spectrum of scedogiine A (**1**) in  $\text{CDCl}_3$

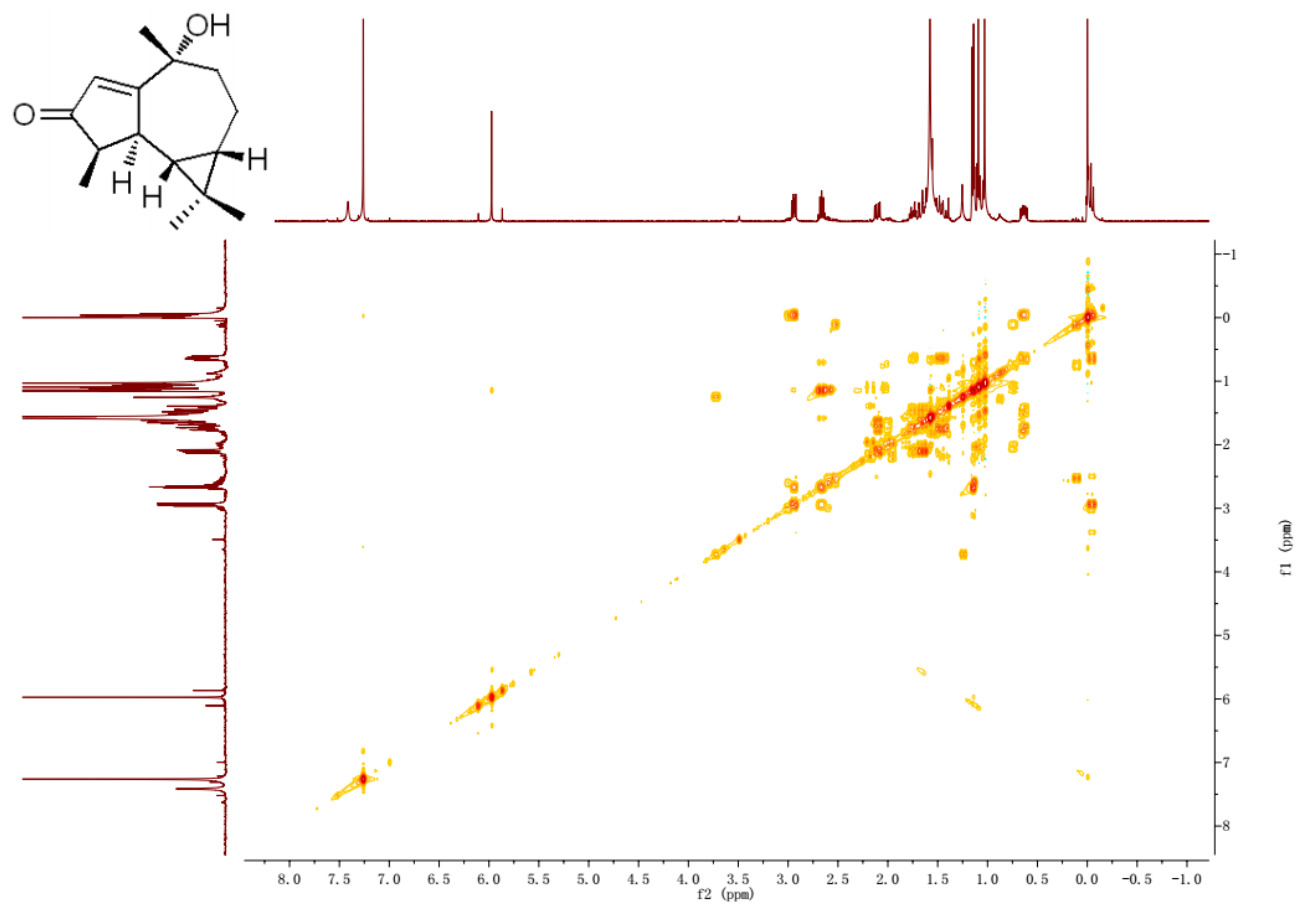

Figure S9. HMBC spectrum of scedogiine A (1) in CDCl<sub>3</sub>

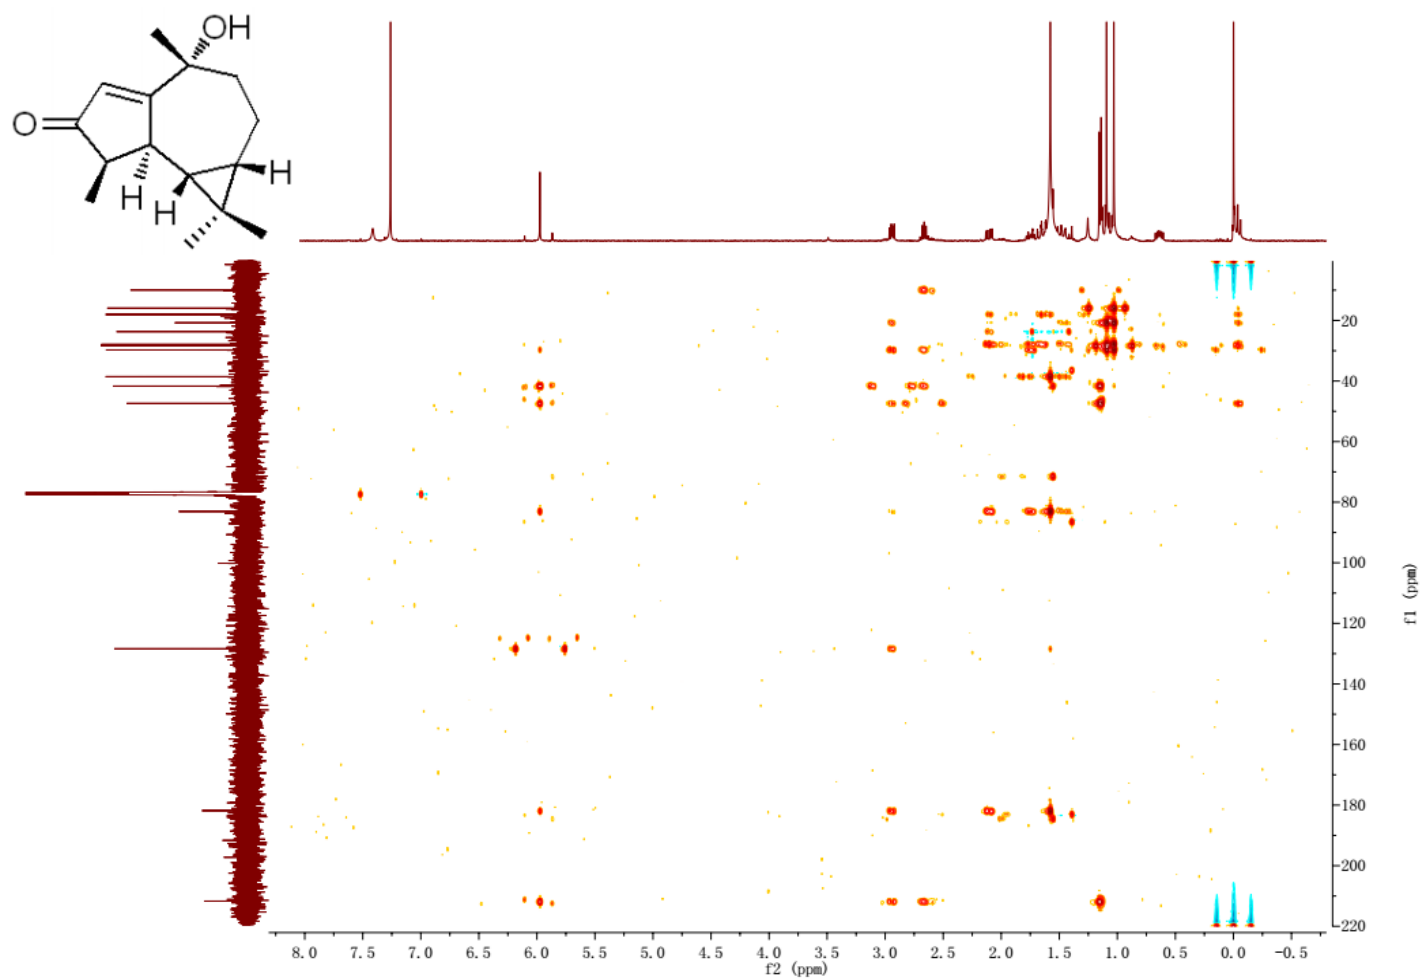

Figure S10. NOESY spectrum of scedogiine A (1) in CDCl<sub>3</sub>

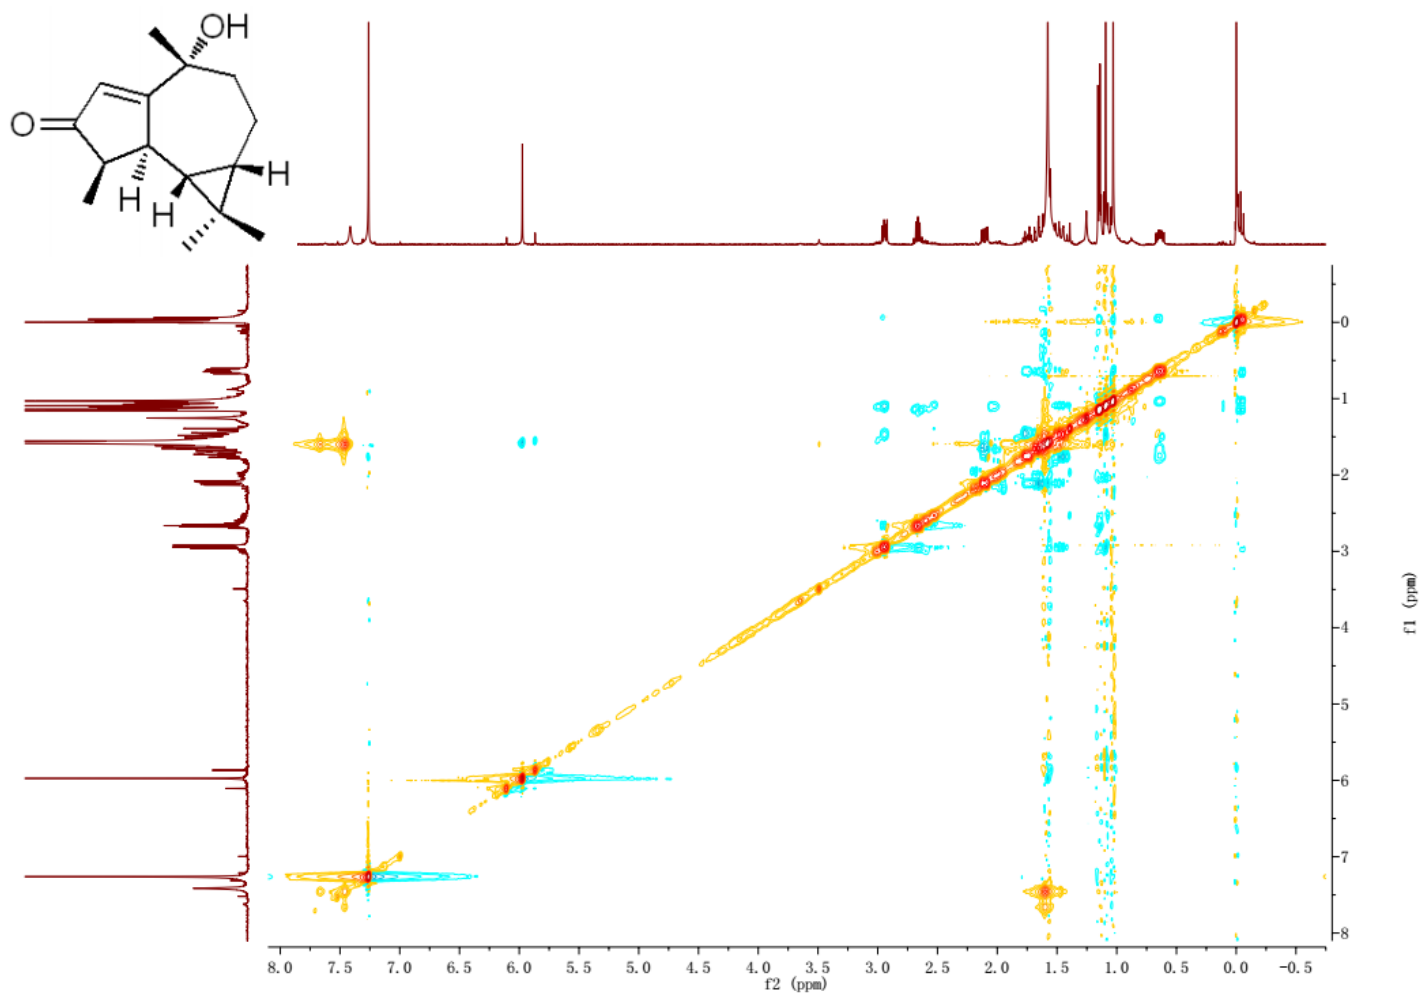

Figure S11.  $^1\text{H-NMR}$  spectrum of scedogiine A (**1**) in acetone- $\text{d}_6$  (400MHz)

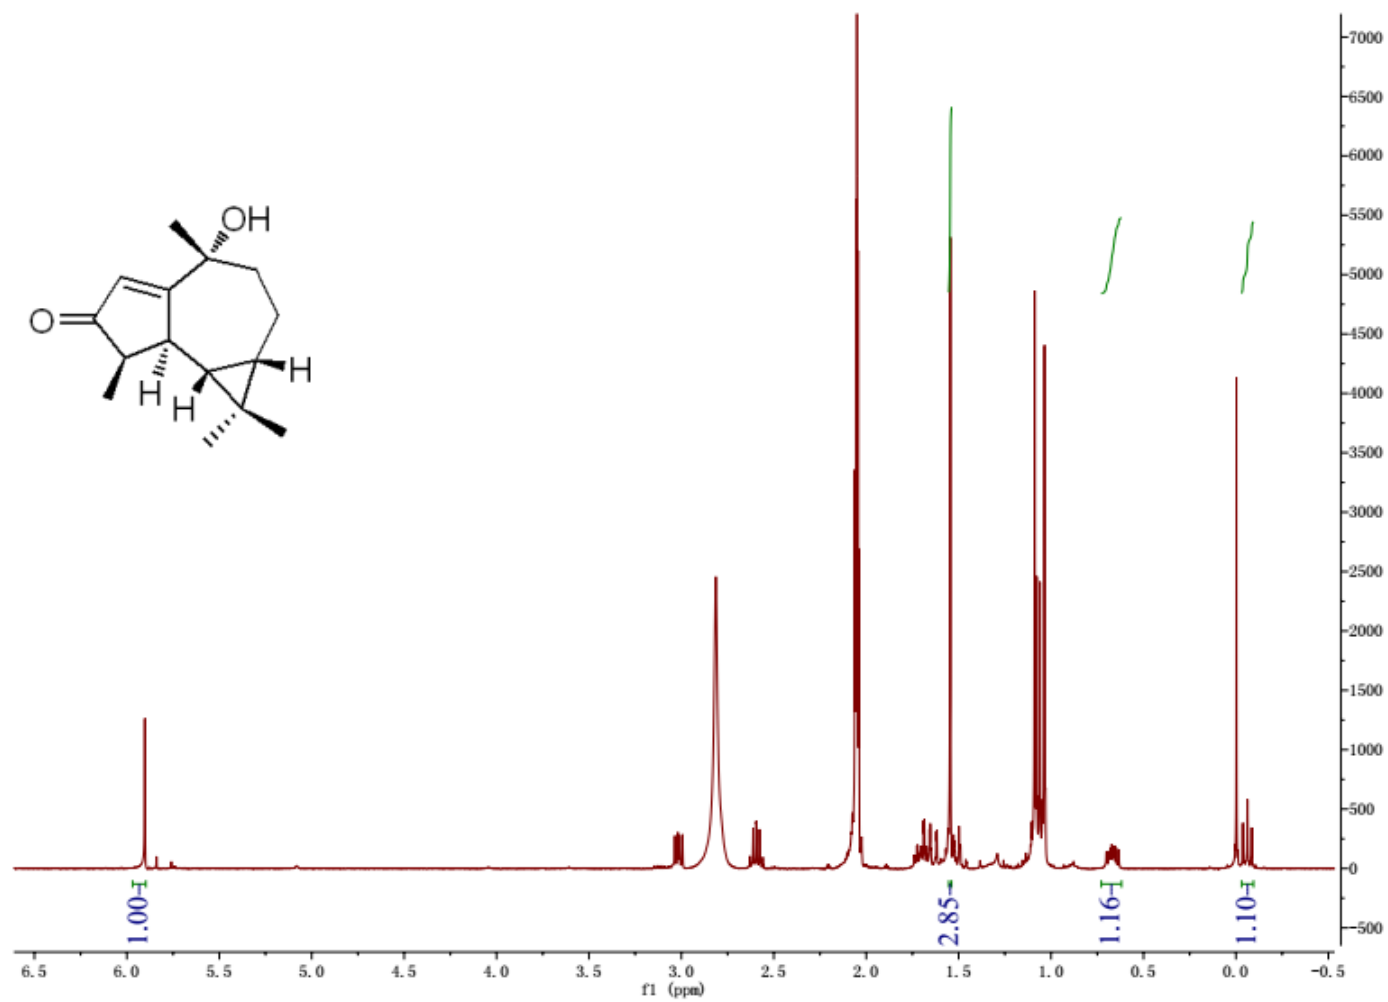

**Figure S12.**  $^1\text{H-NMR}$  spectrum of scedogiine A (**1**) in  $\text{CD}_3\text{OD}$  (400MHz)

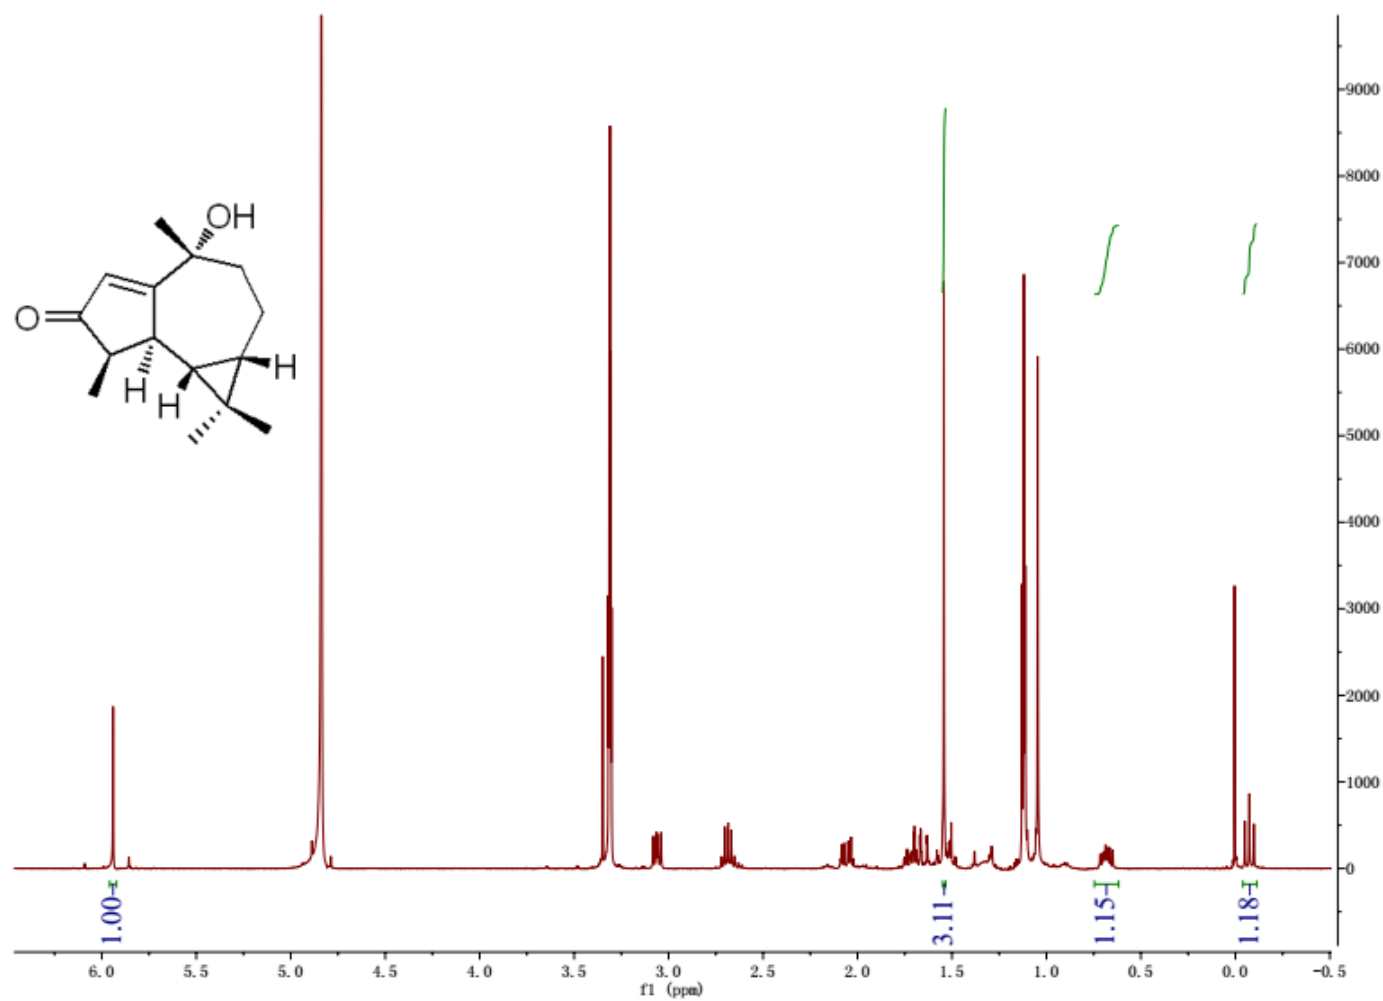

Figure S13. HR-ESI-MS spectrum of scedogiine B (2)

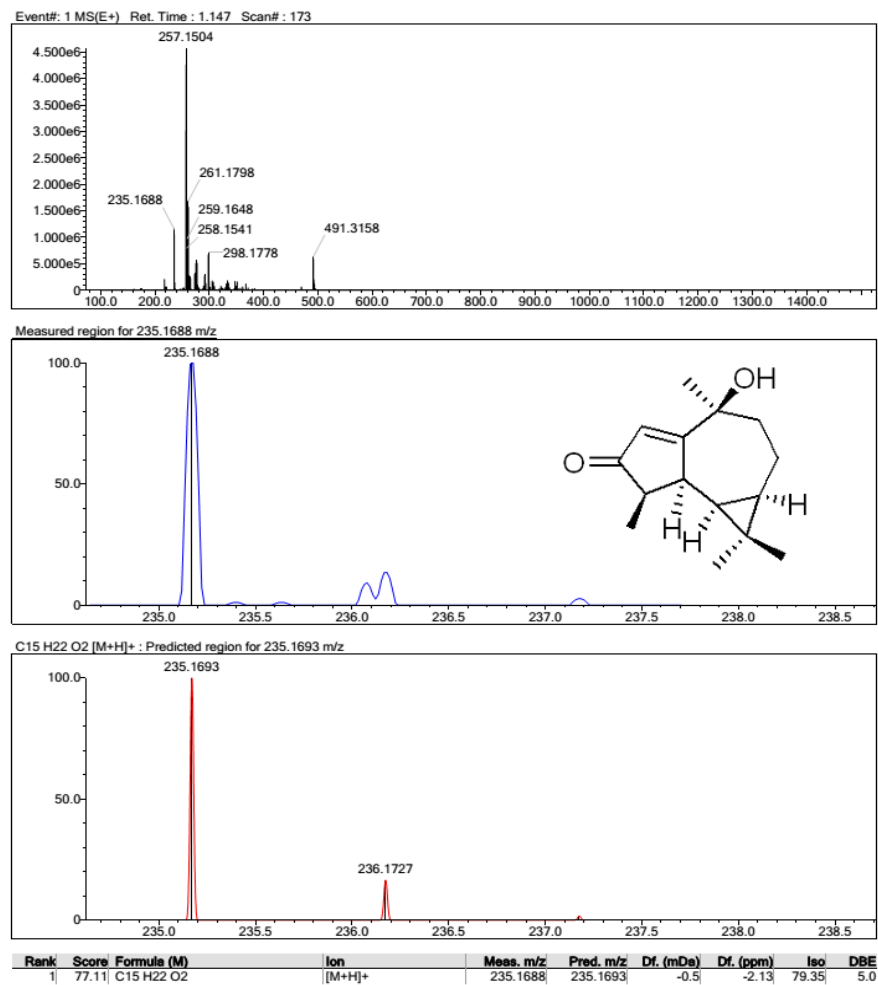

Figure S14. <sup>1</sup>H-NMR spectrum of scedogiine B (2) in CDCl<sub>3</sub> (400MHz)

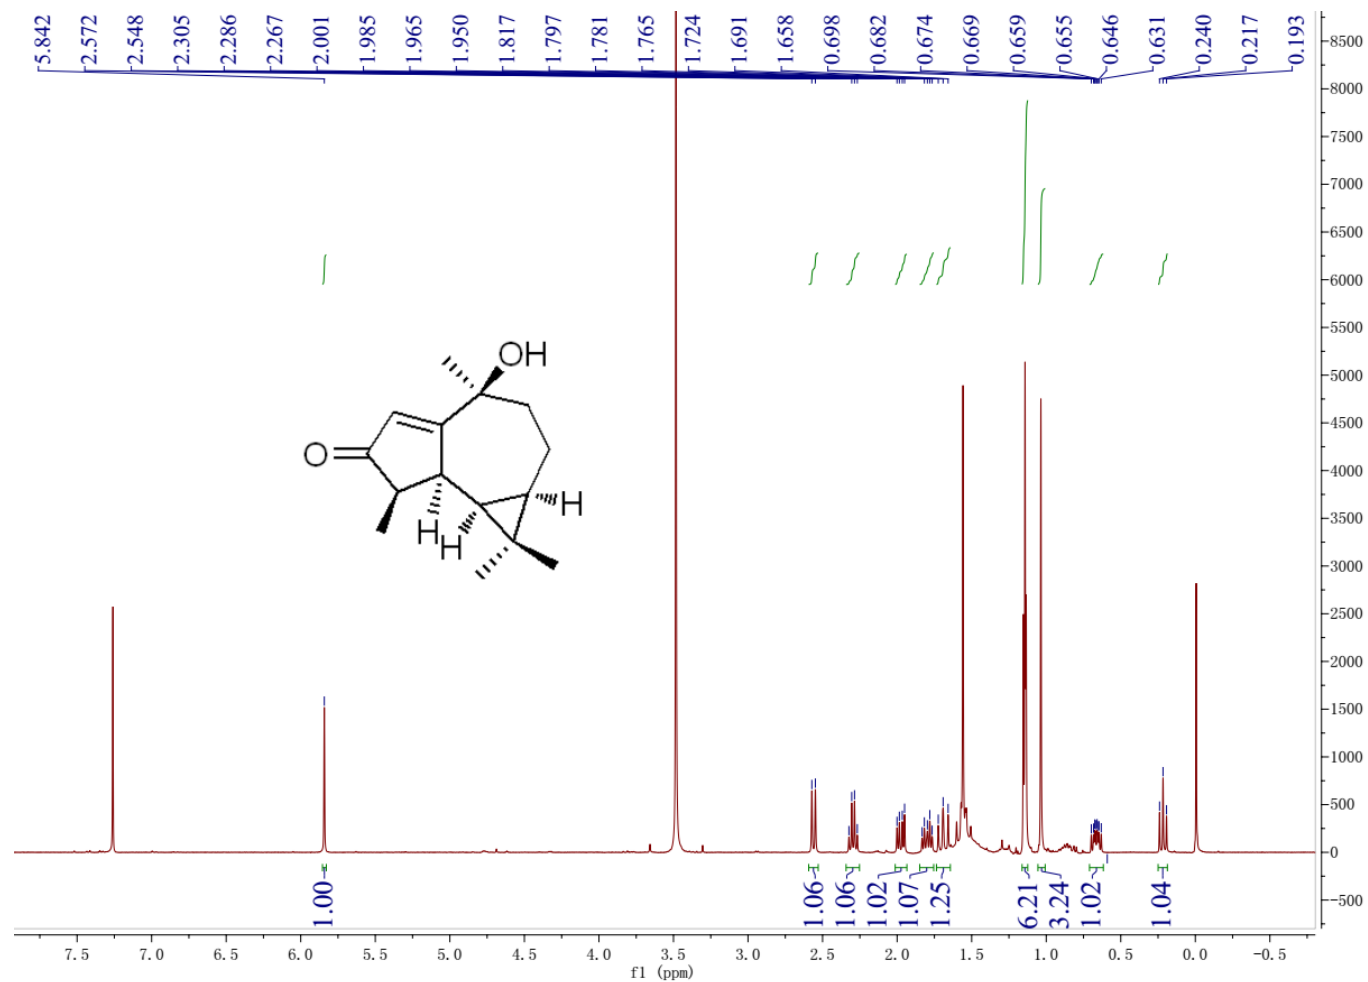



Figure S15.  $^{13}\text{C}$  NMR spectrum of scedogine B (2) in  $\text{CDCl}_3$  (100MHz)

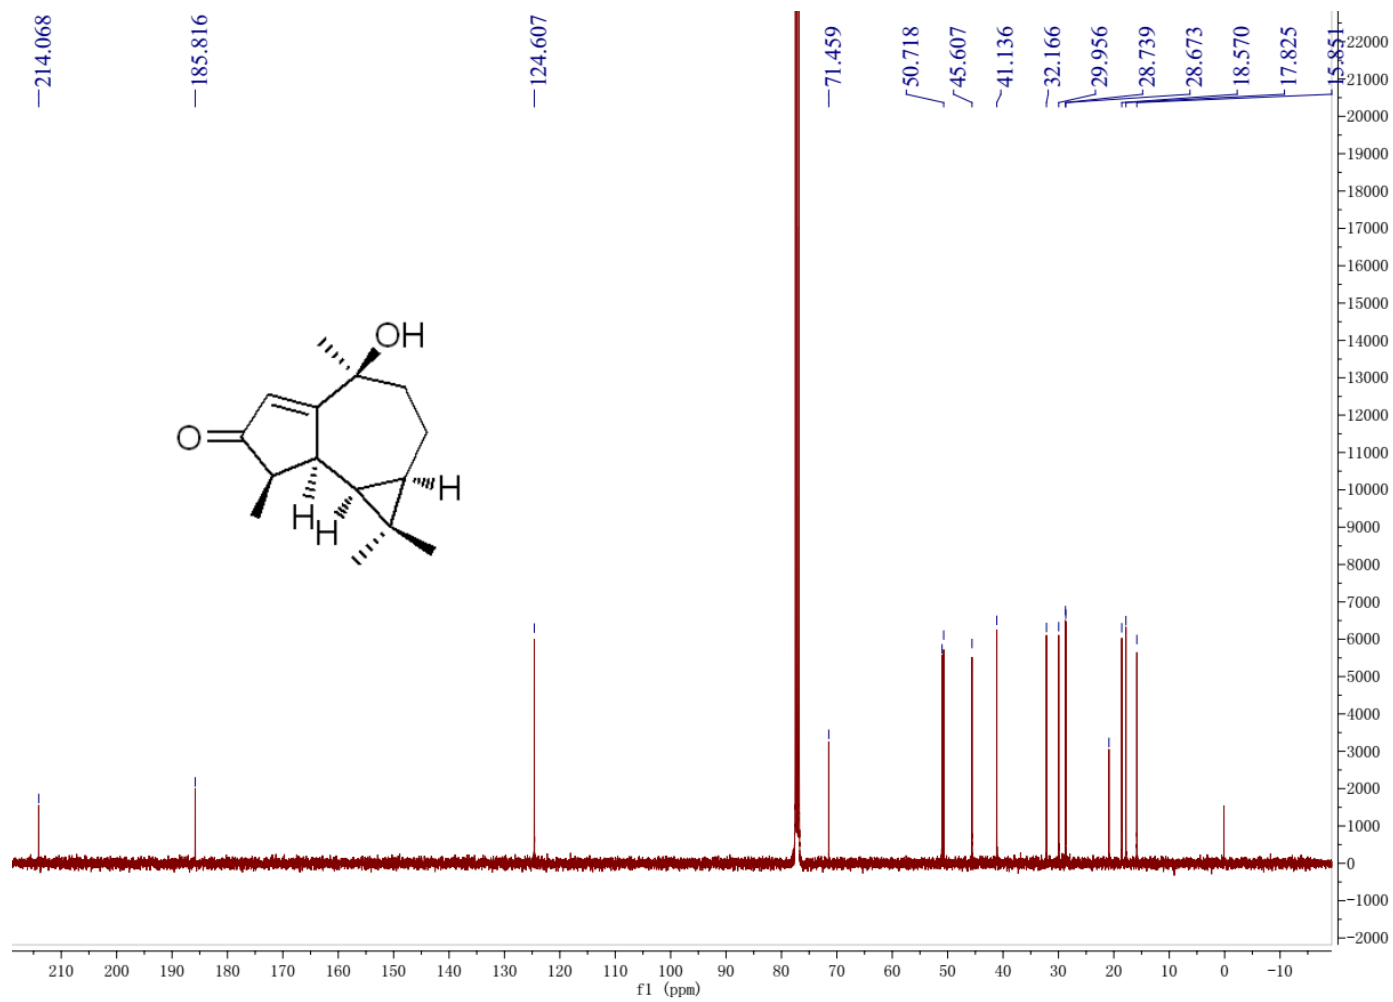

Figure S16. DEPT 135 spectrum of scedogiine B (2) in CDCl<sub>3</sub> (100MHz)

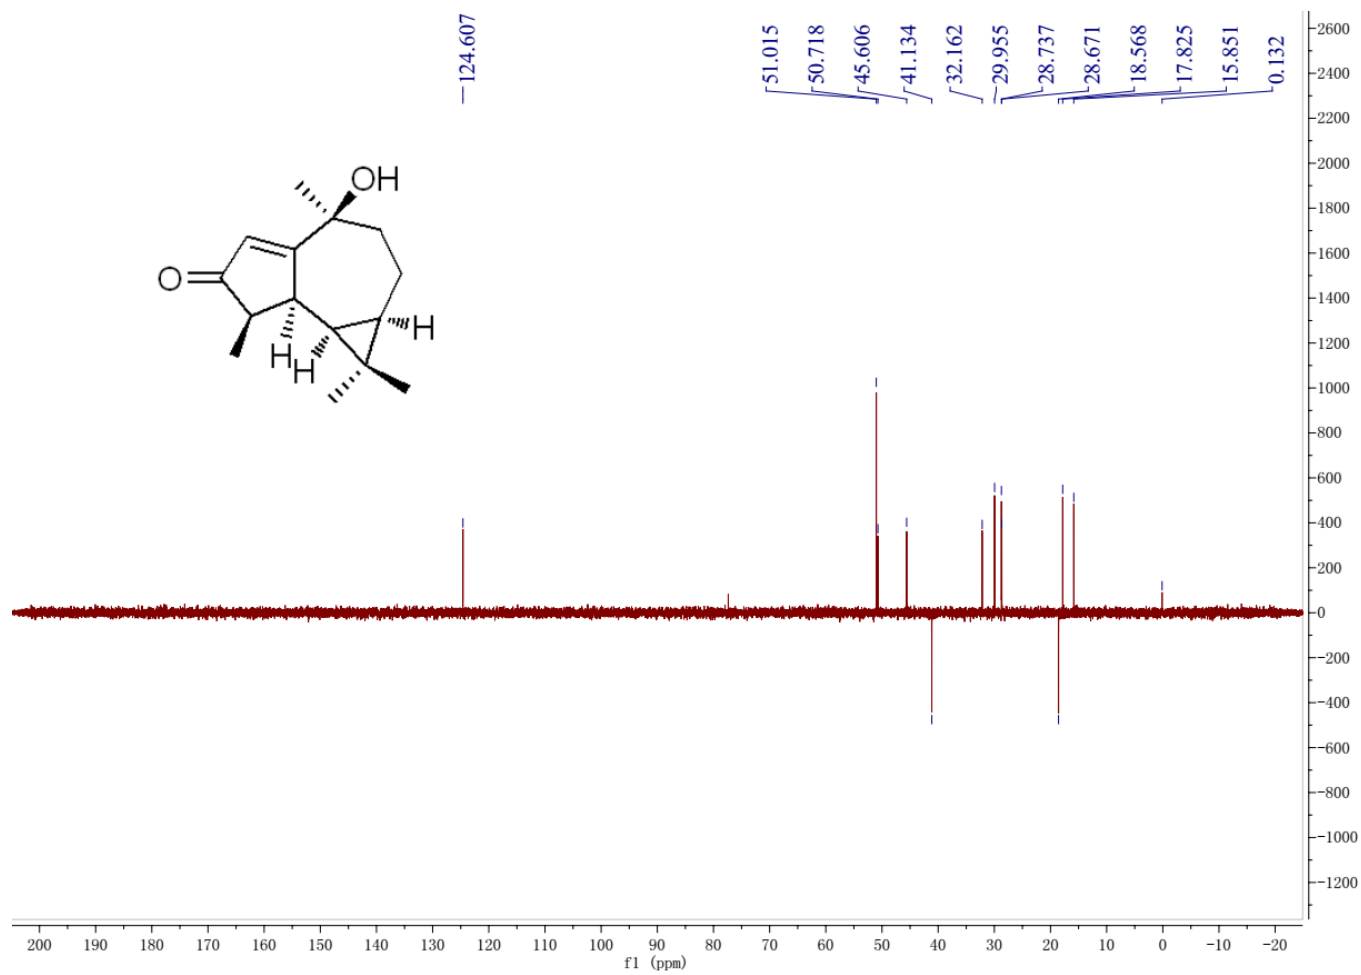

Figure S17. HMQC spectrum of scedogine B (2) in CDCl<sub>3</sub>

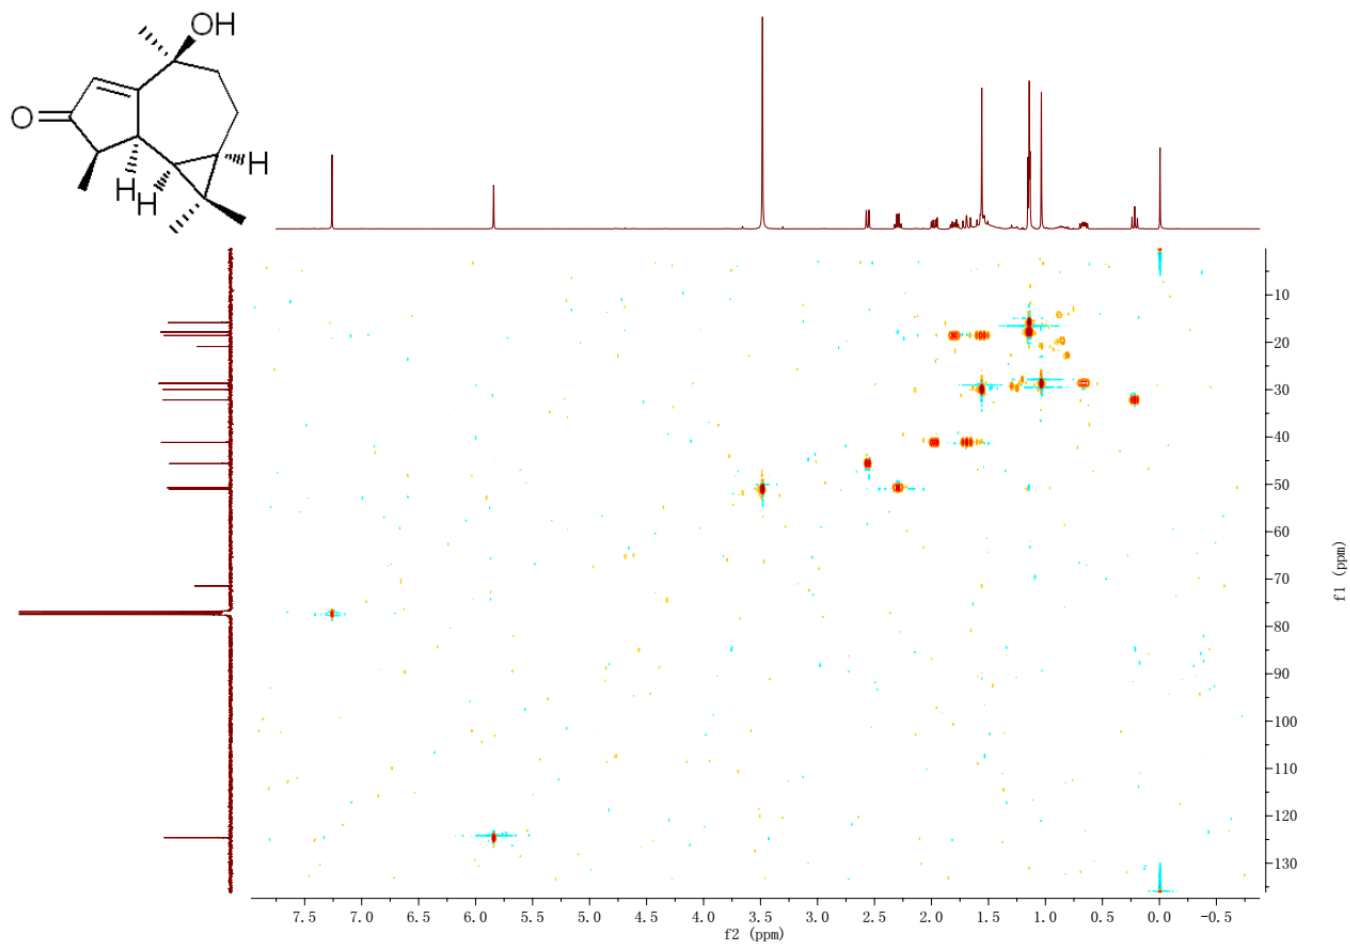

Figure S18.  $^1\text{H}$ - $^1\text{H}$  COSY spectrum of scedogine B (2) in  $\text{CDCl}_3$

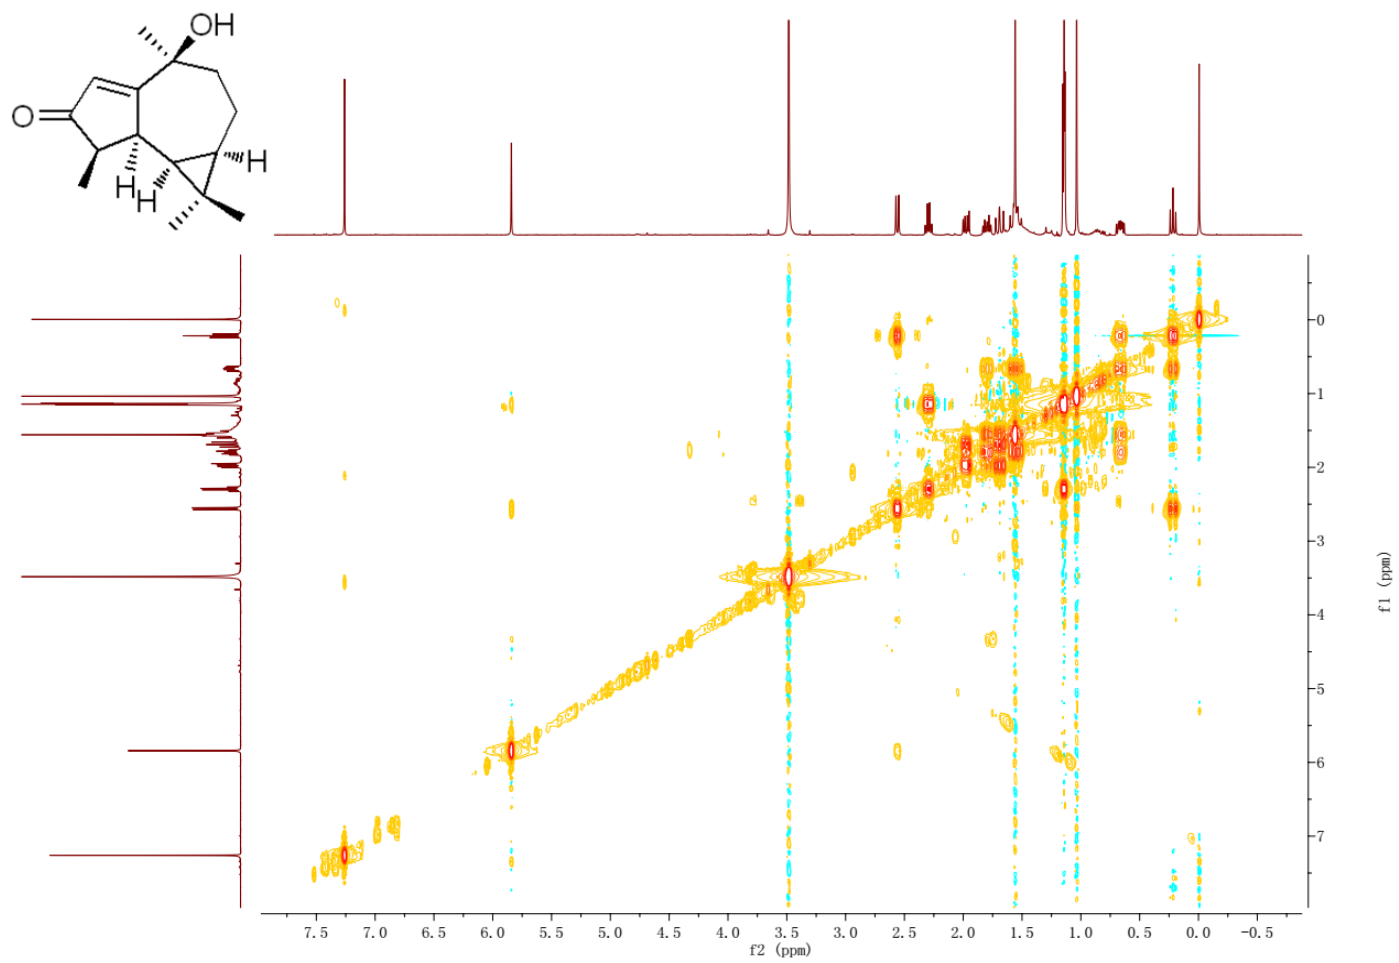

Figure S19. HMBC spectrum of scedogine B (2) in CDCl<sub>3</sub>

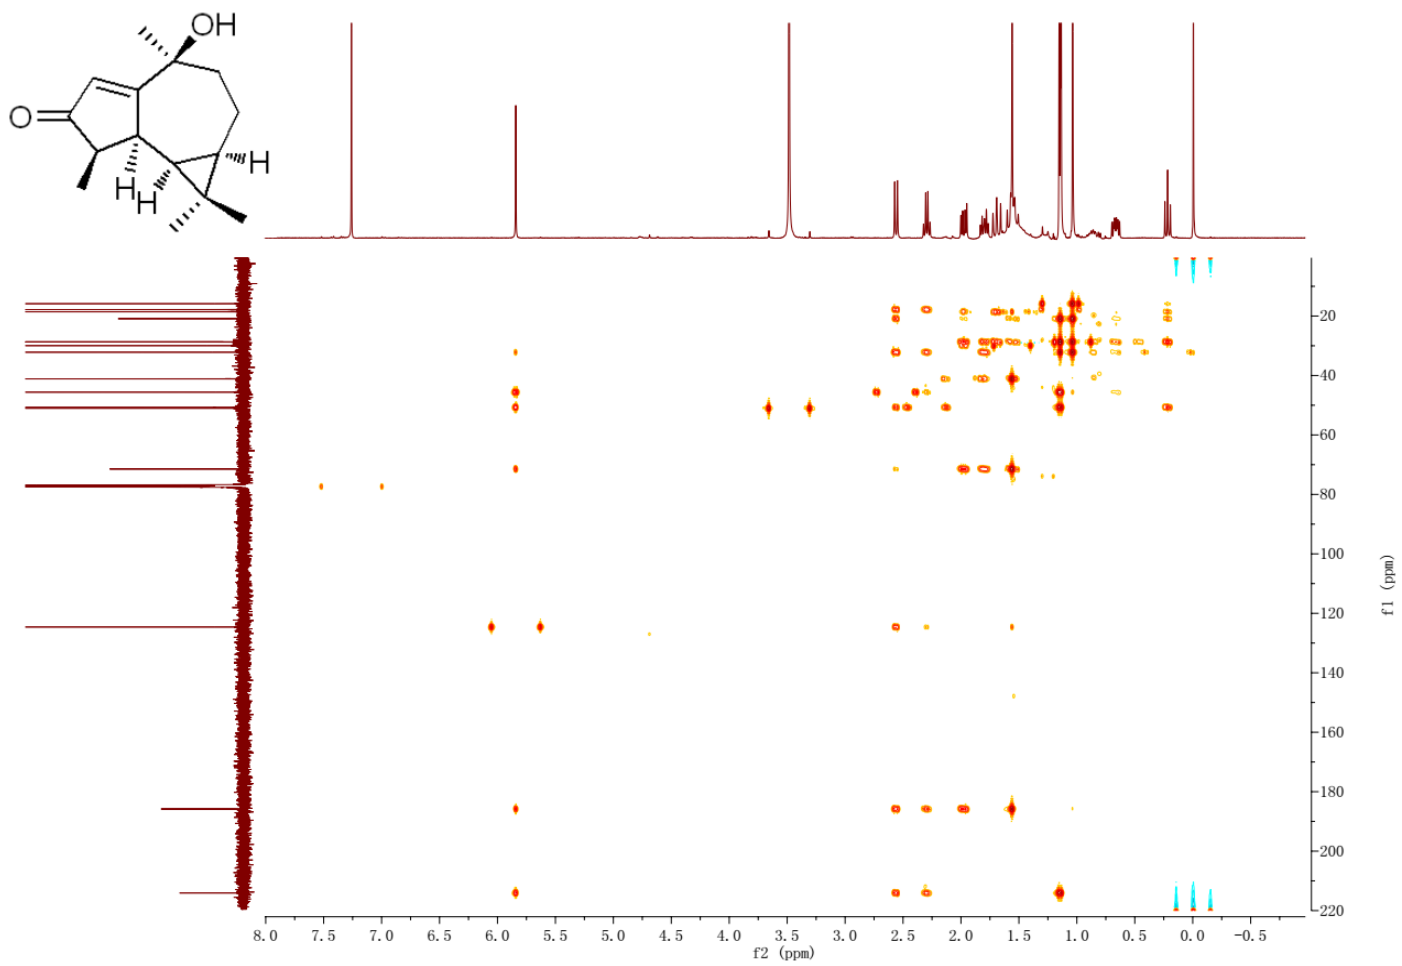

Figure S20. NOESY spectrum of scedogiine B (2) in CDCl<sub>3</sub>

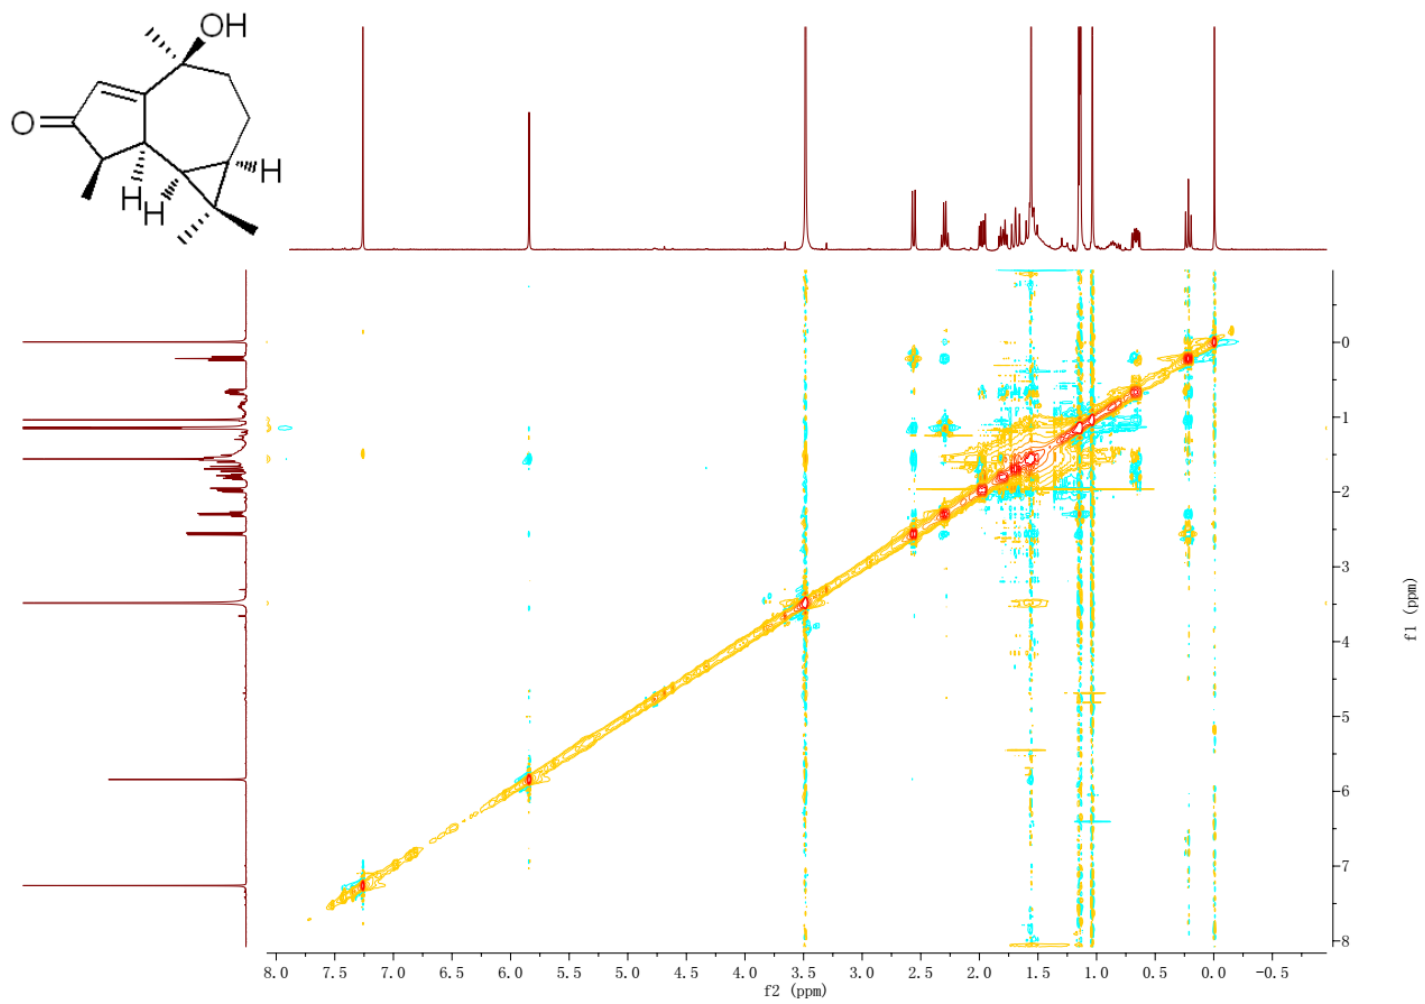

**Figure S21.** HR-ESI-MS spectrum of scedogiine C (**3**)

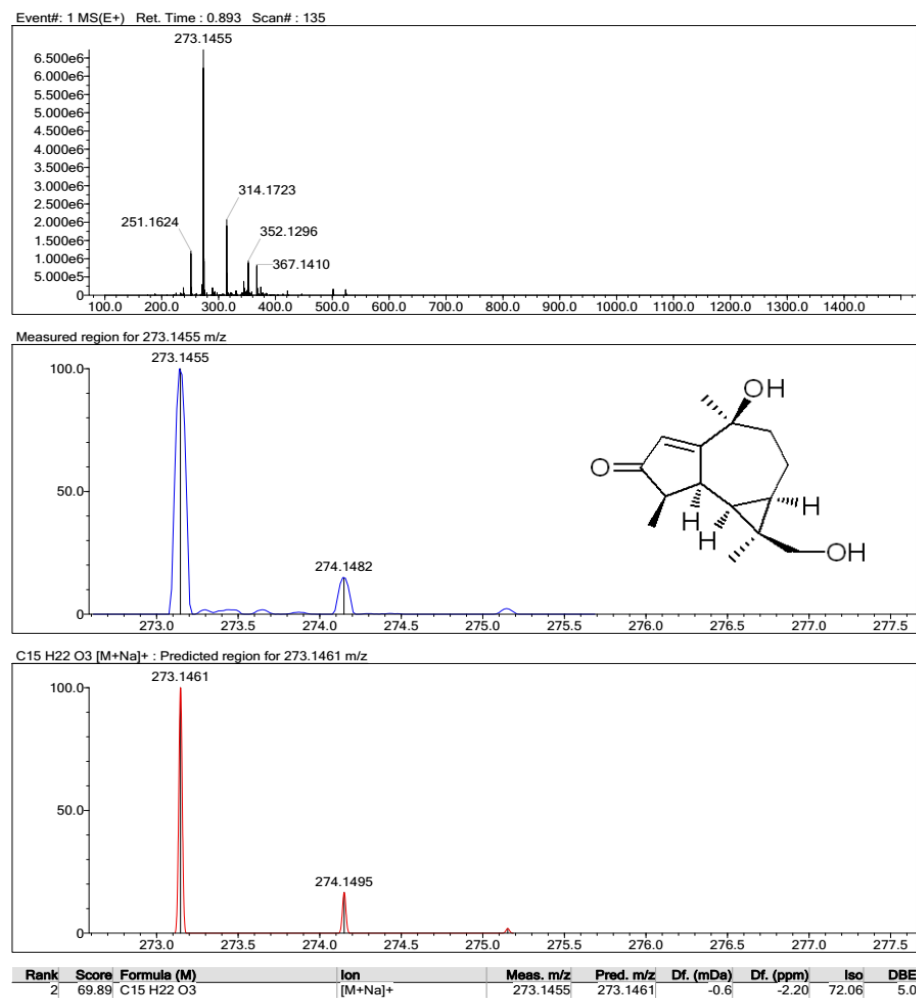

Figure S22. <sup>1</sup>H-NMR spectrum of scedogiine C (**3**) in CDCl<sub>3</sub> (400MHz)

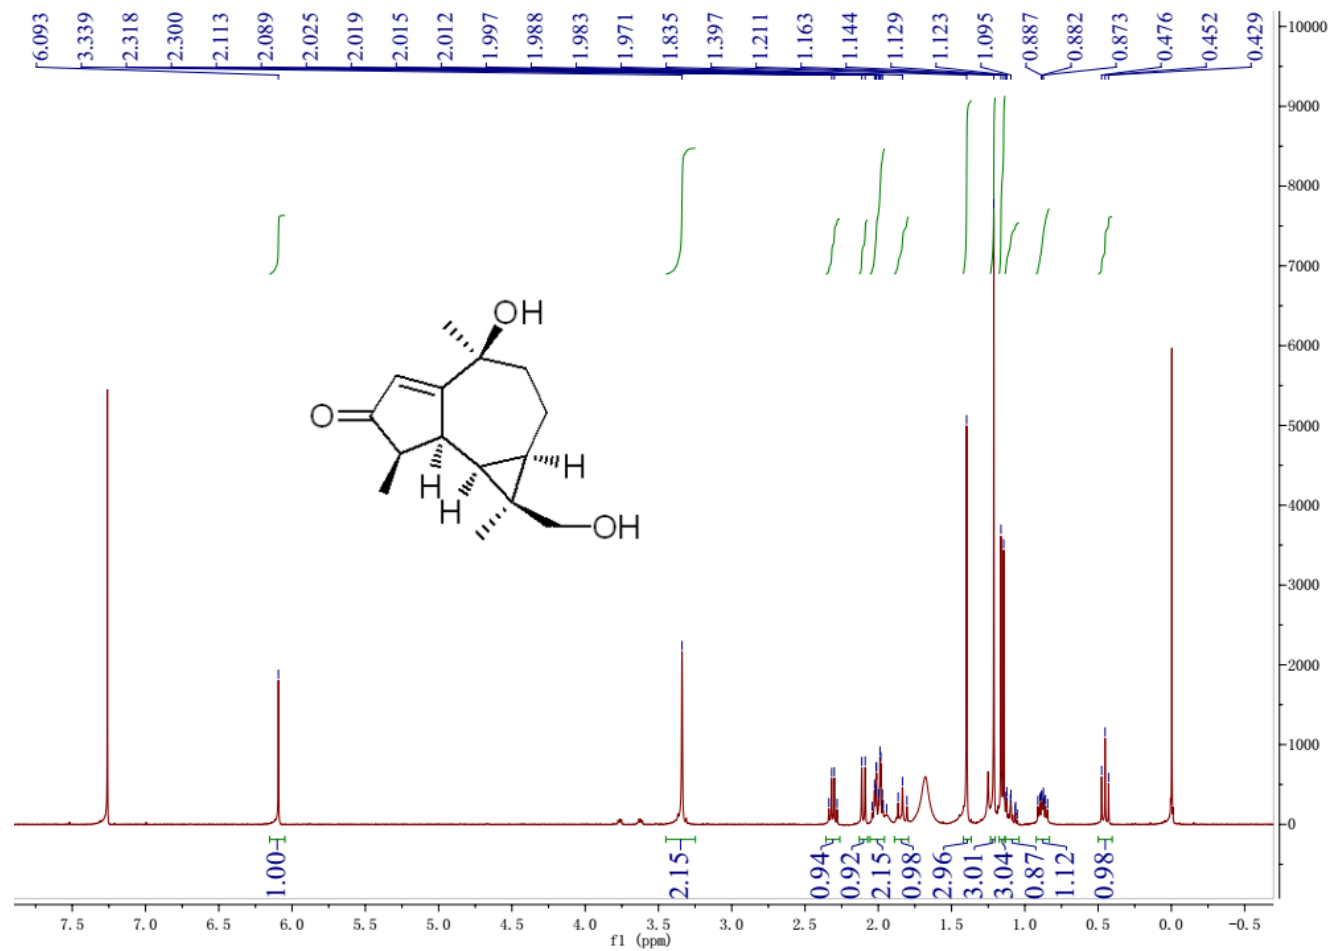



**Figure S23.**  $^{13}\text{C}$  NMR spectrum of scedogine C (**3**) in  $\text{CDCl}_3$  (100MHz)

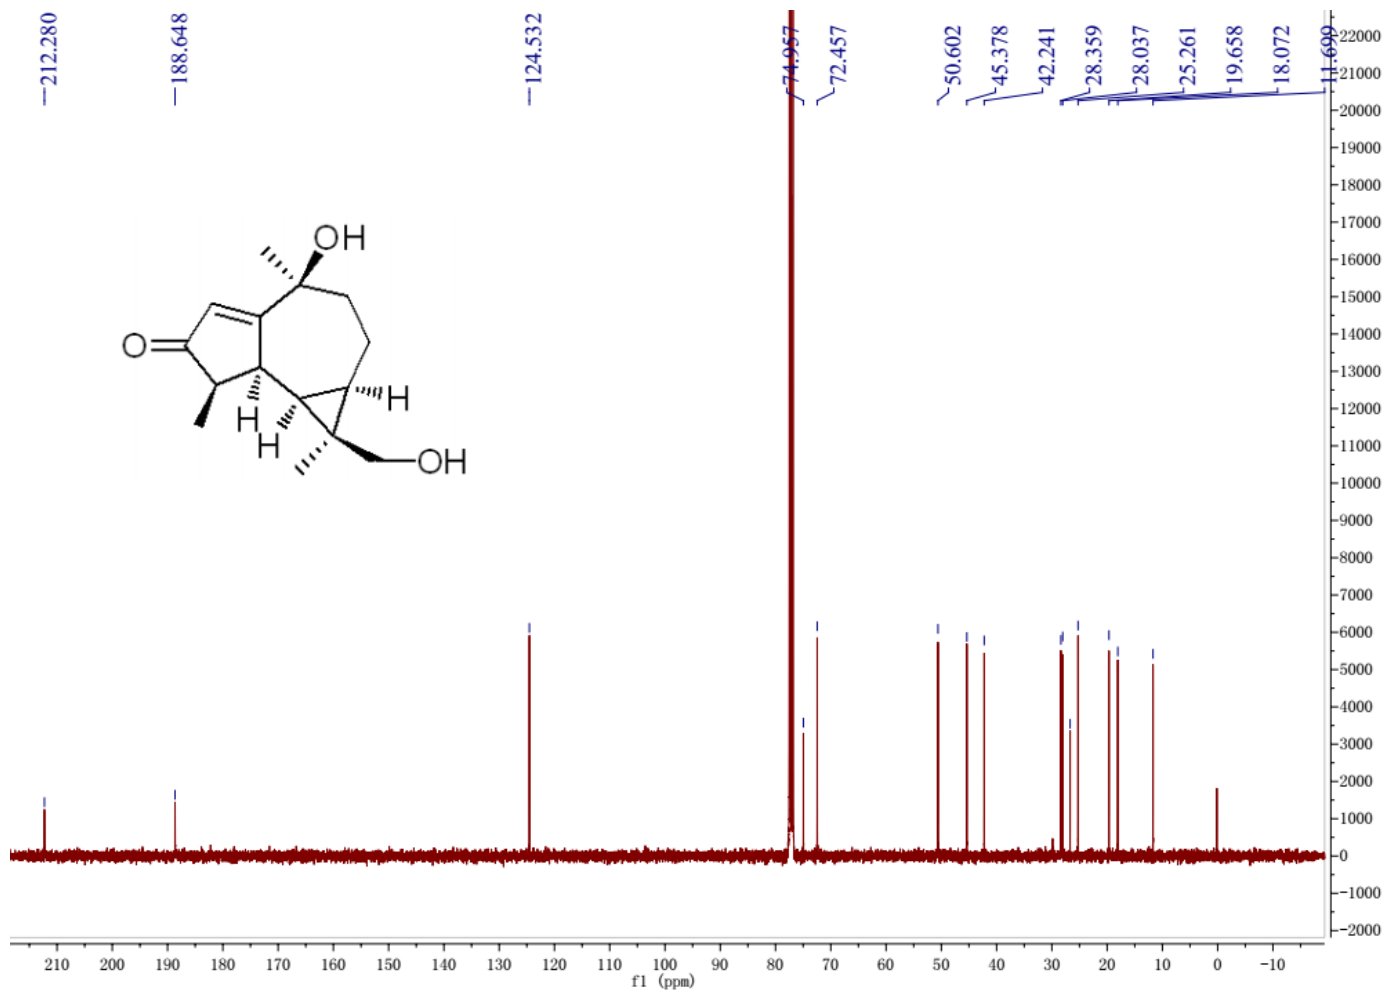

Figure S24. DEPT 135 spectrum of scedogiine C (**3**) in CDCl<sub>3</sub> (100MHz)

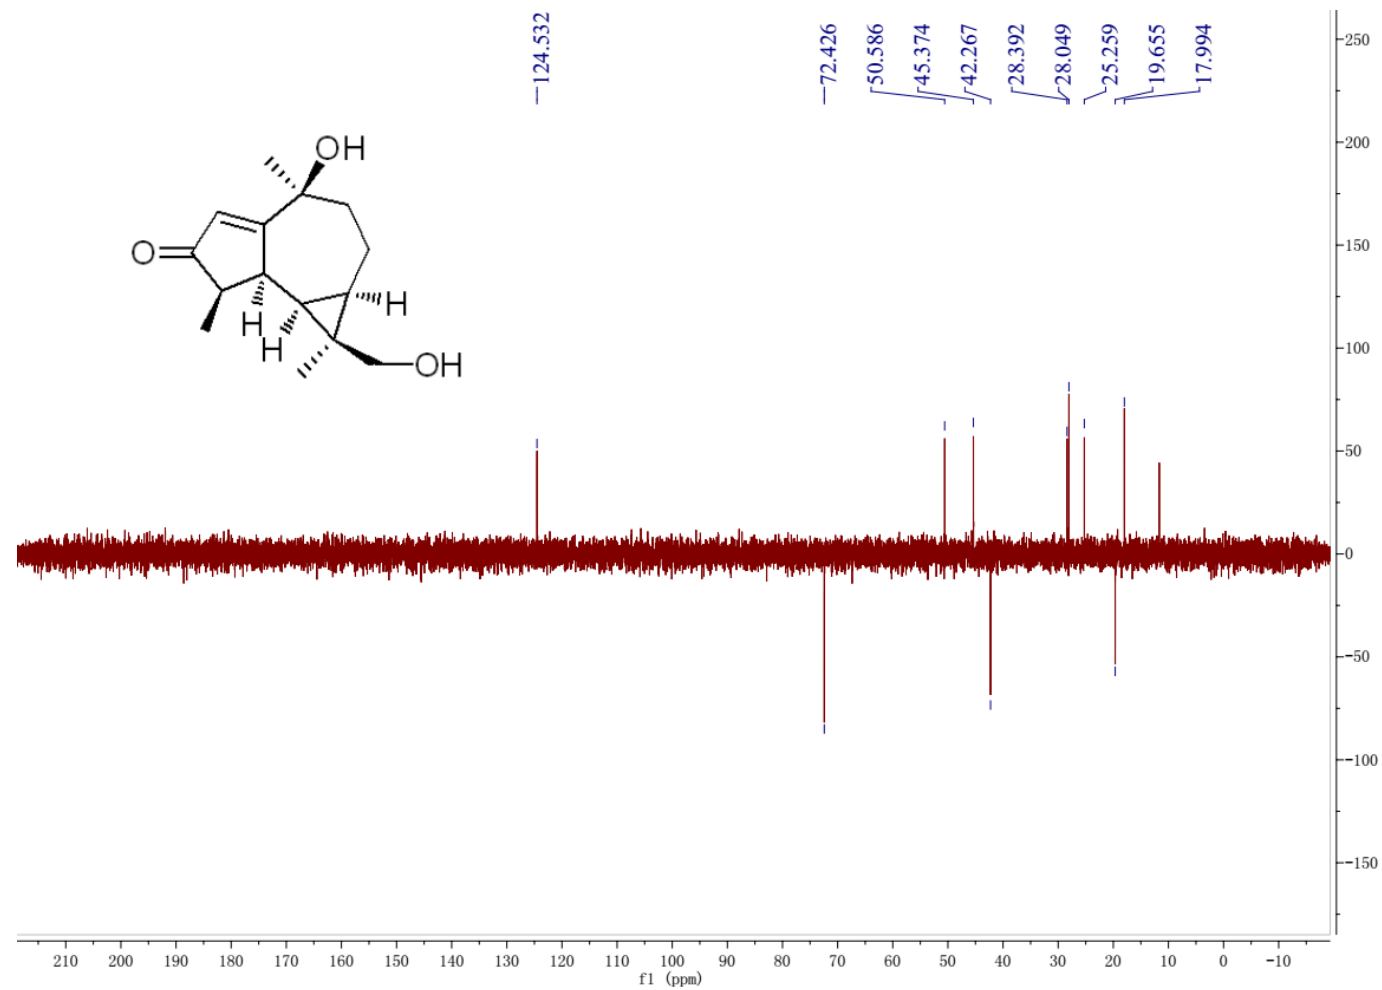

Figure S25. HMQC spectrum of scedogine C (**3**) in CDCl<sub>3</sub>

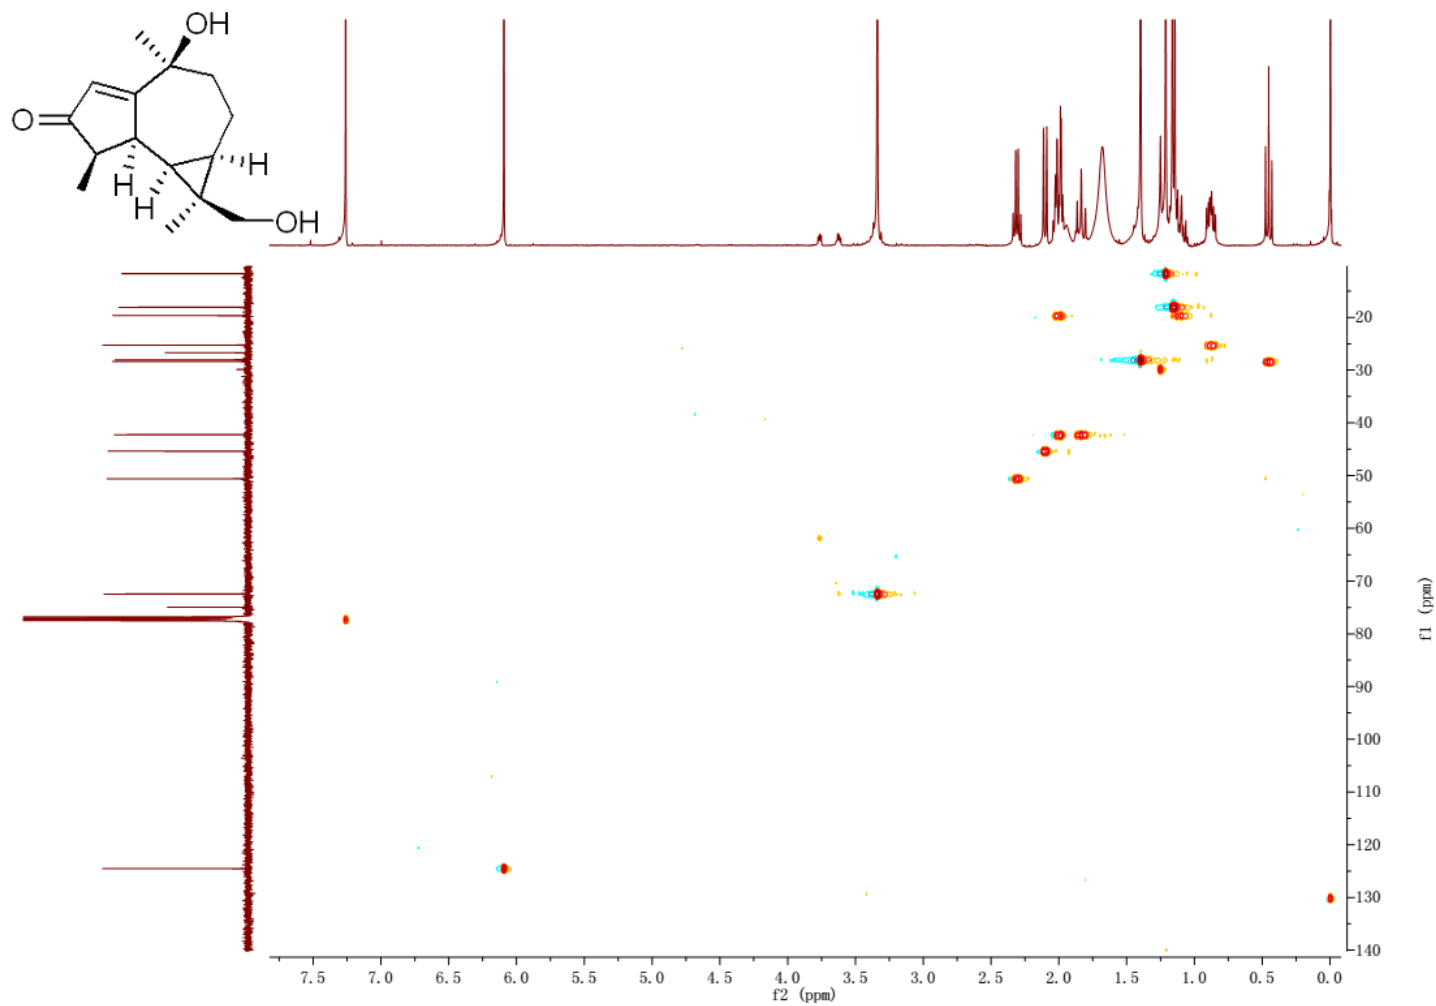

Figure S26.  $^1\text{H}$ - $^1\text{H}$  COSY spectrum of scedogine C (**3**) in  $\text{CDCl}_3$

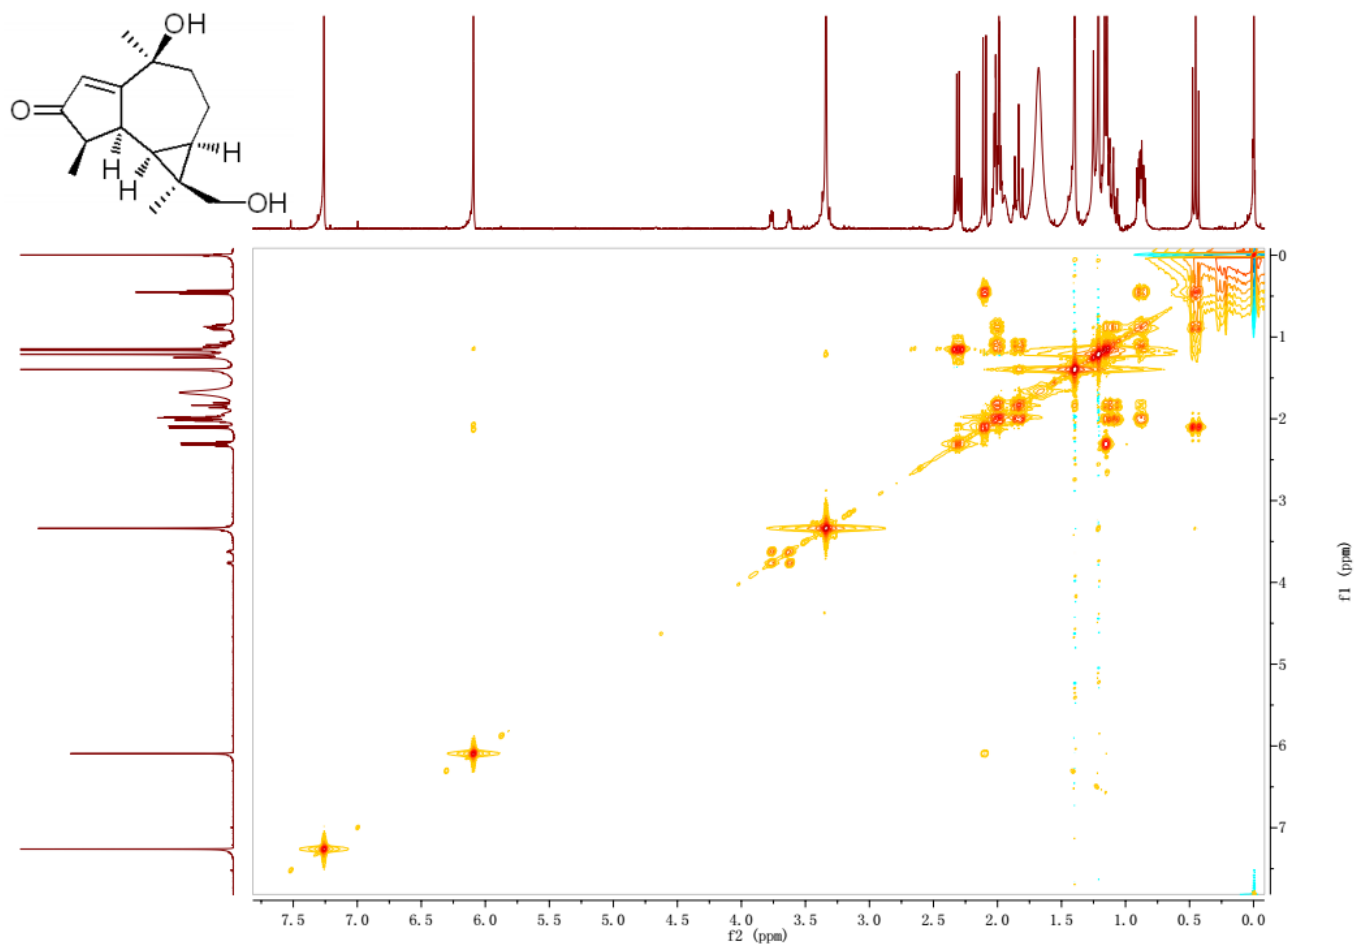

Figure S27. HMBC spectrum of scedogine C (**3**) in CDCl<sub>3</sub>

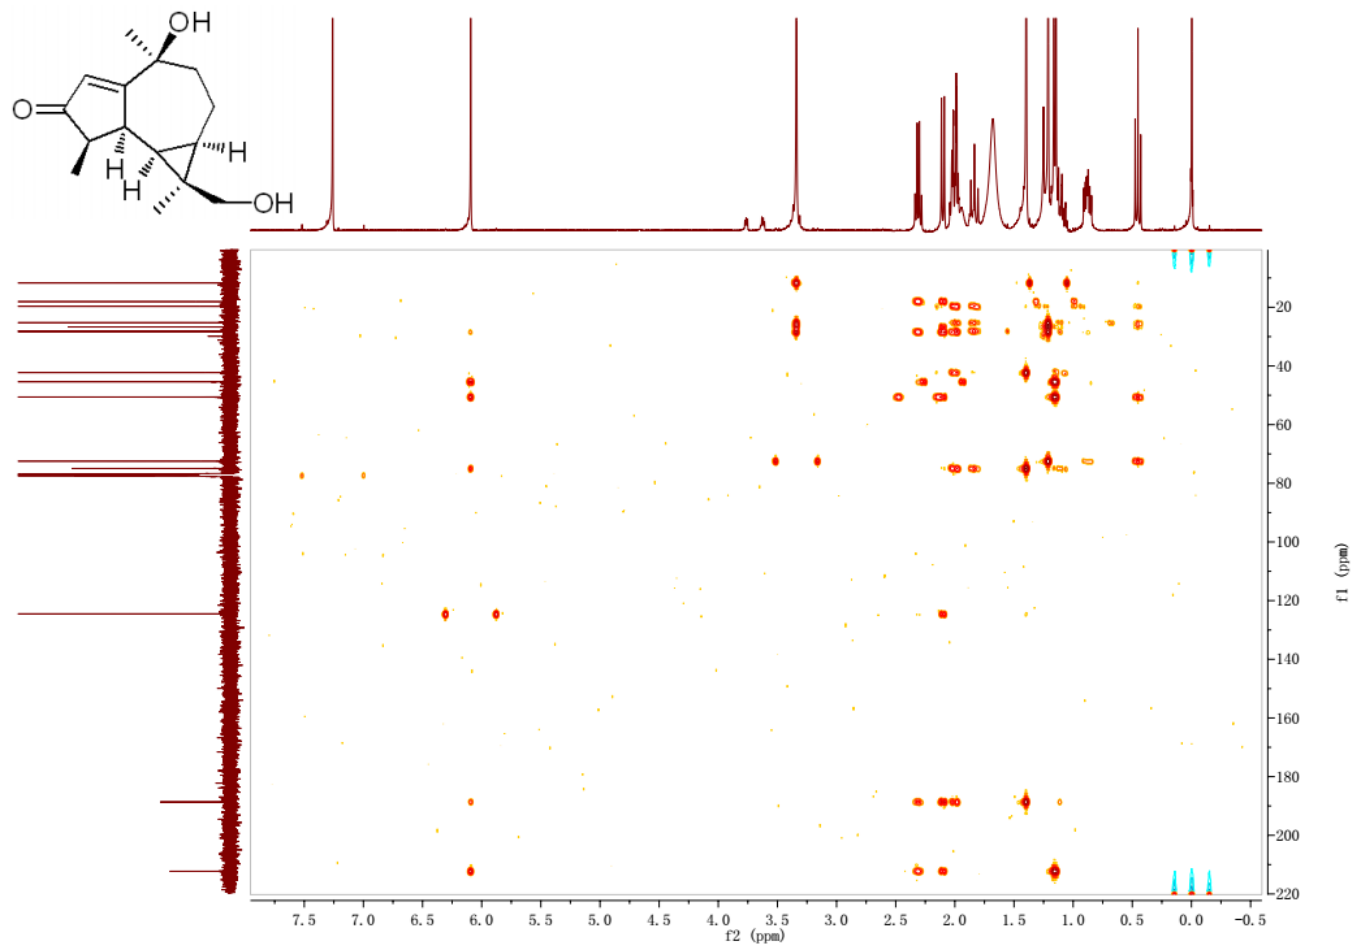

Figure S28. NOESY spectrum of scedogiine C (3) in CDCl<sub>3</sub>

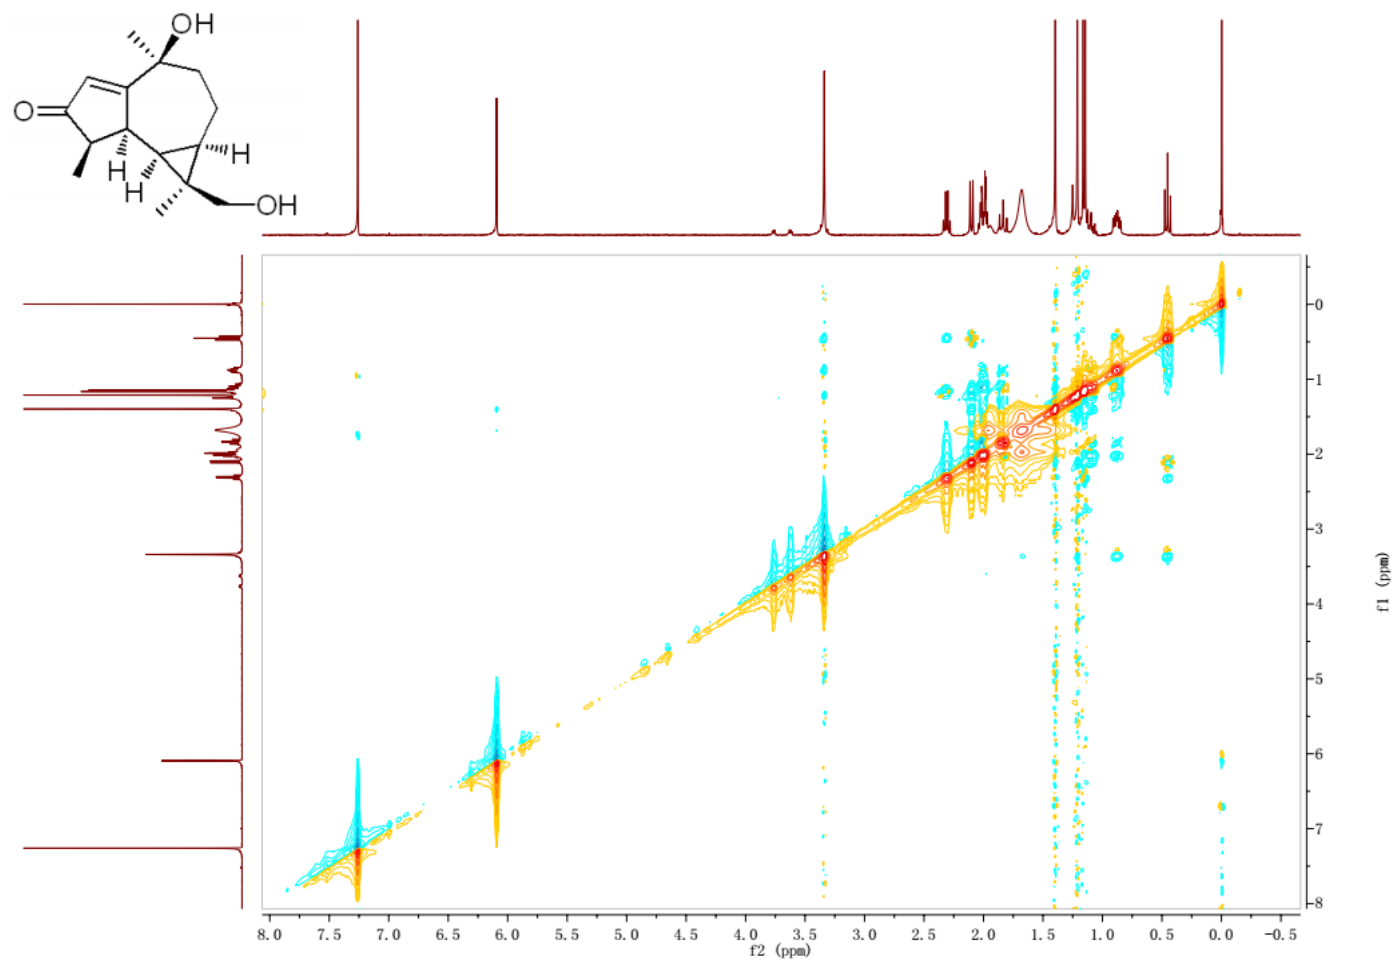

Figure S29. <sup>1</sup>H-NMR spectrum of pseuboydone A (4) in CDCl<sub>3</sub> (400MHz)

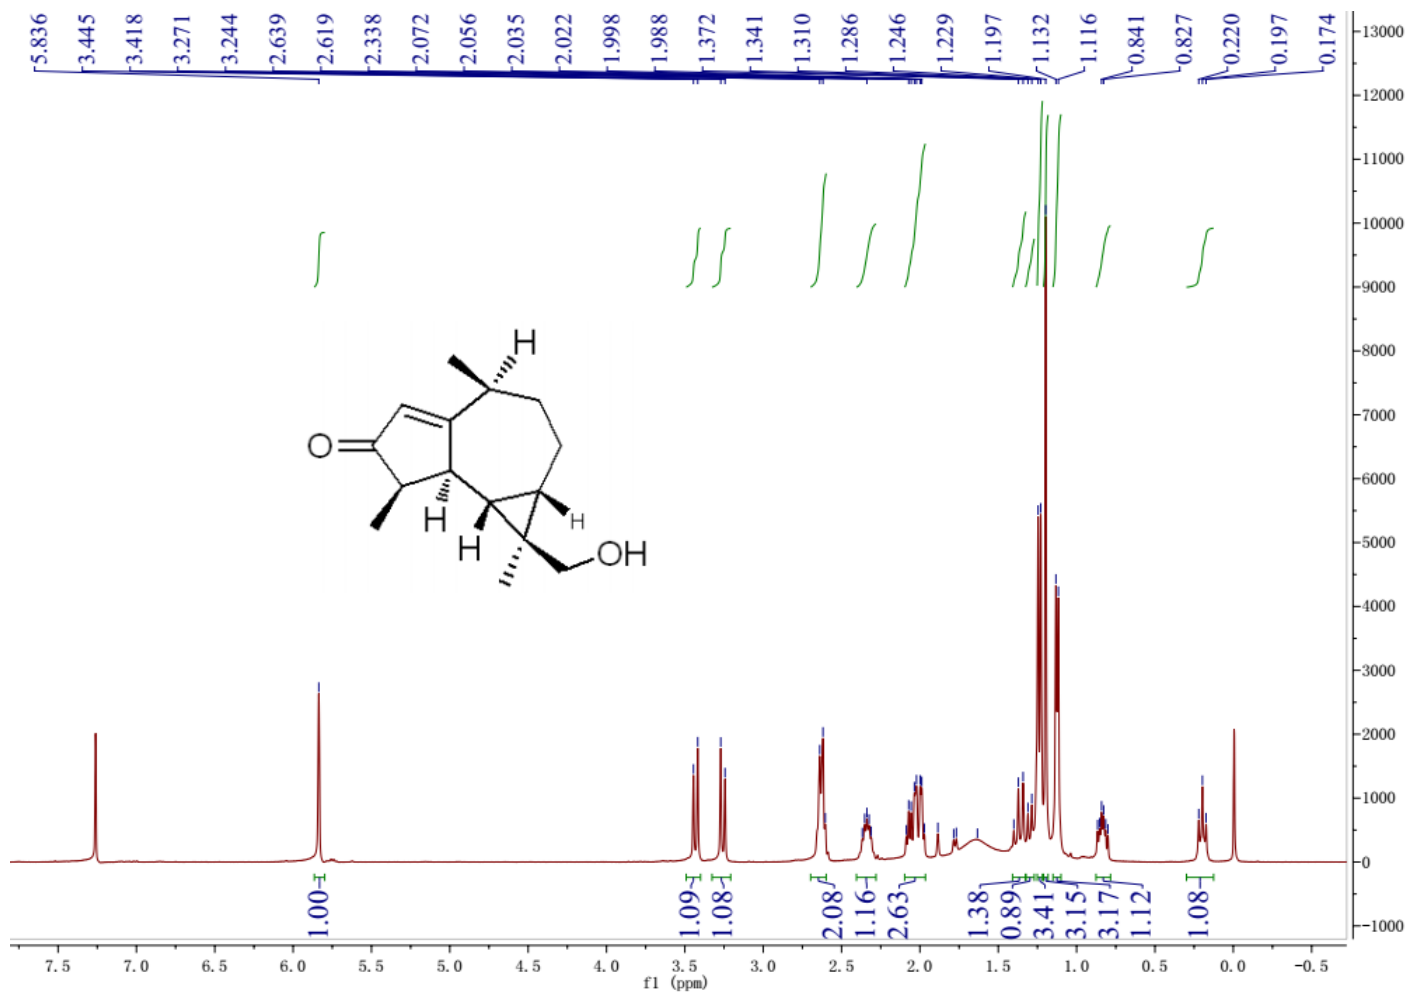

Figure S30.  $^{13}\text{C}$  NMR spectrum of pseuboydone A (**4**) in  $\text{CDCl}_3$  (100MHz)

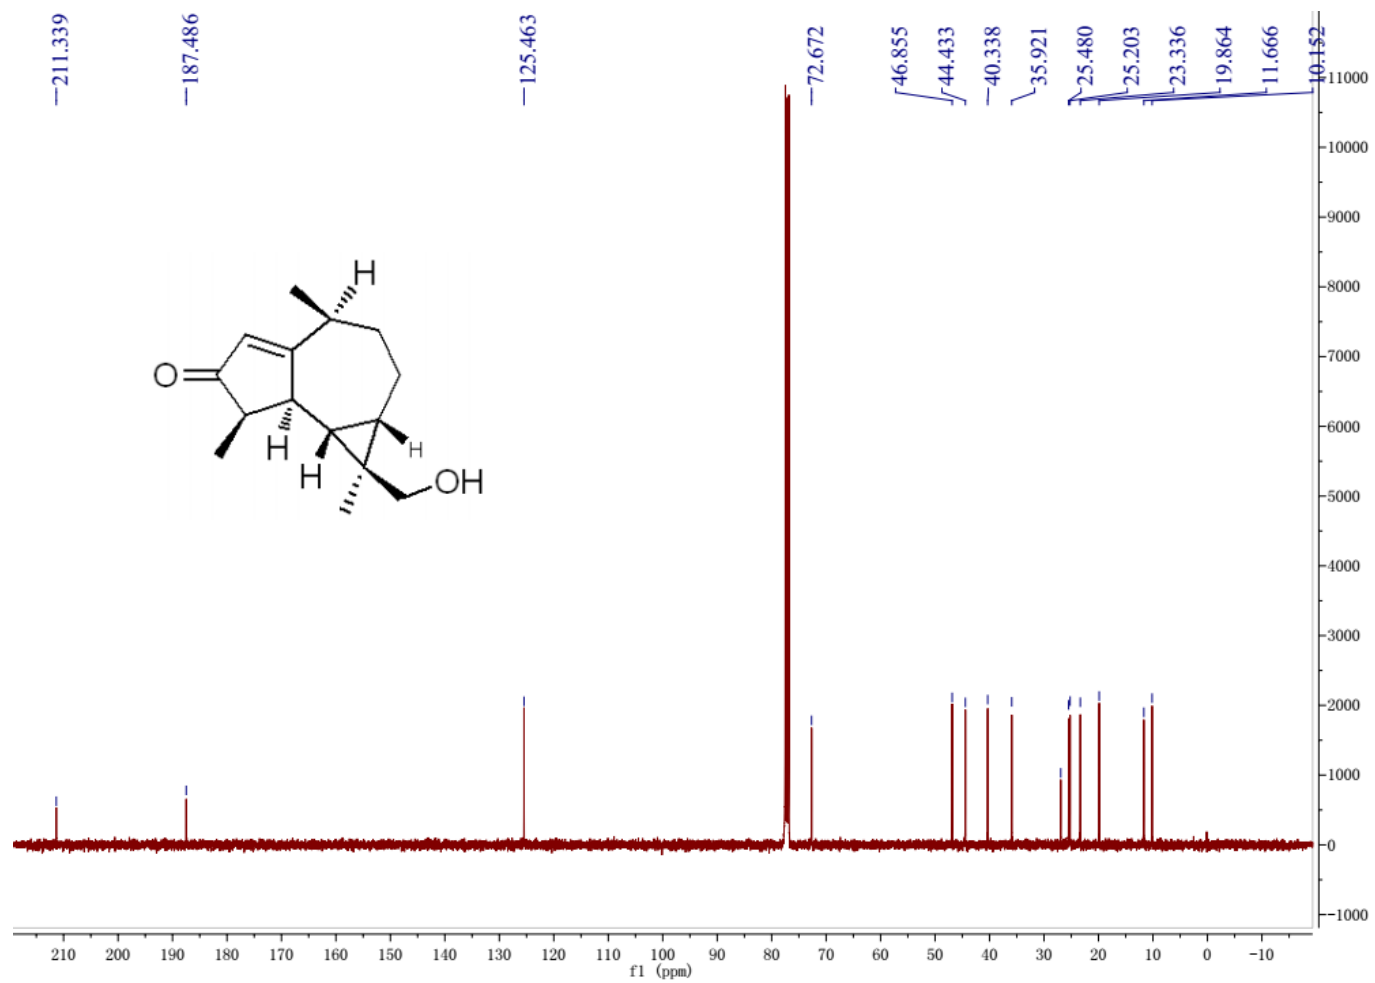



Figure S31. <sup>1</sup>H-NMR spectrum of pseuboydone B (5) in CDCl<sub>3</sub> (400MHz)

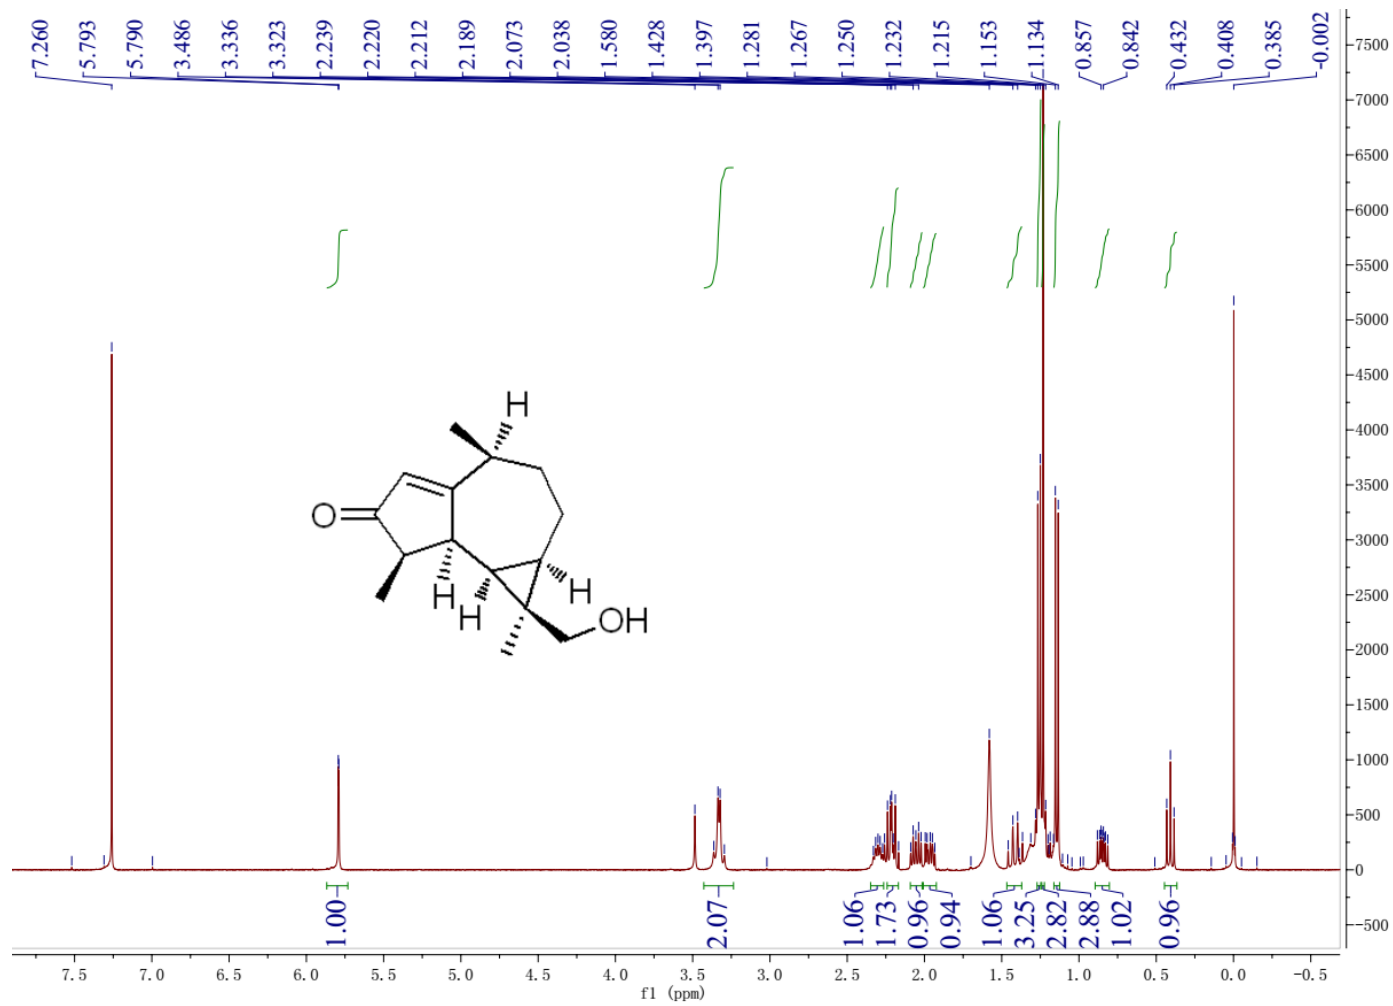

Figure S32.  $^{13}\text{C}$  NMR spectrum of pseuboydone B (**5**) in  $\text{CDCl}_3$  (100MHz)

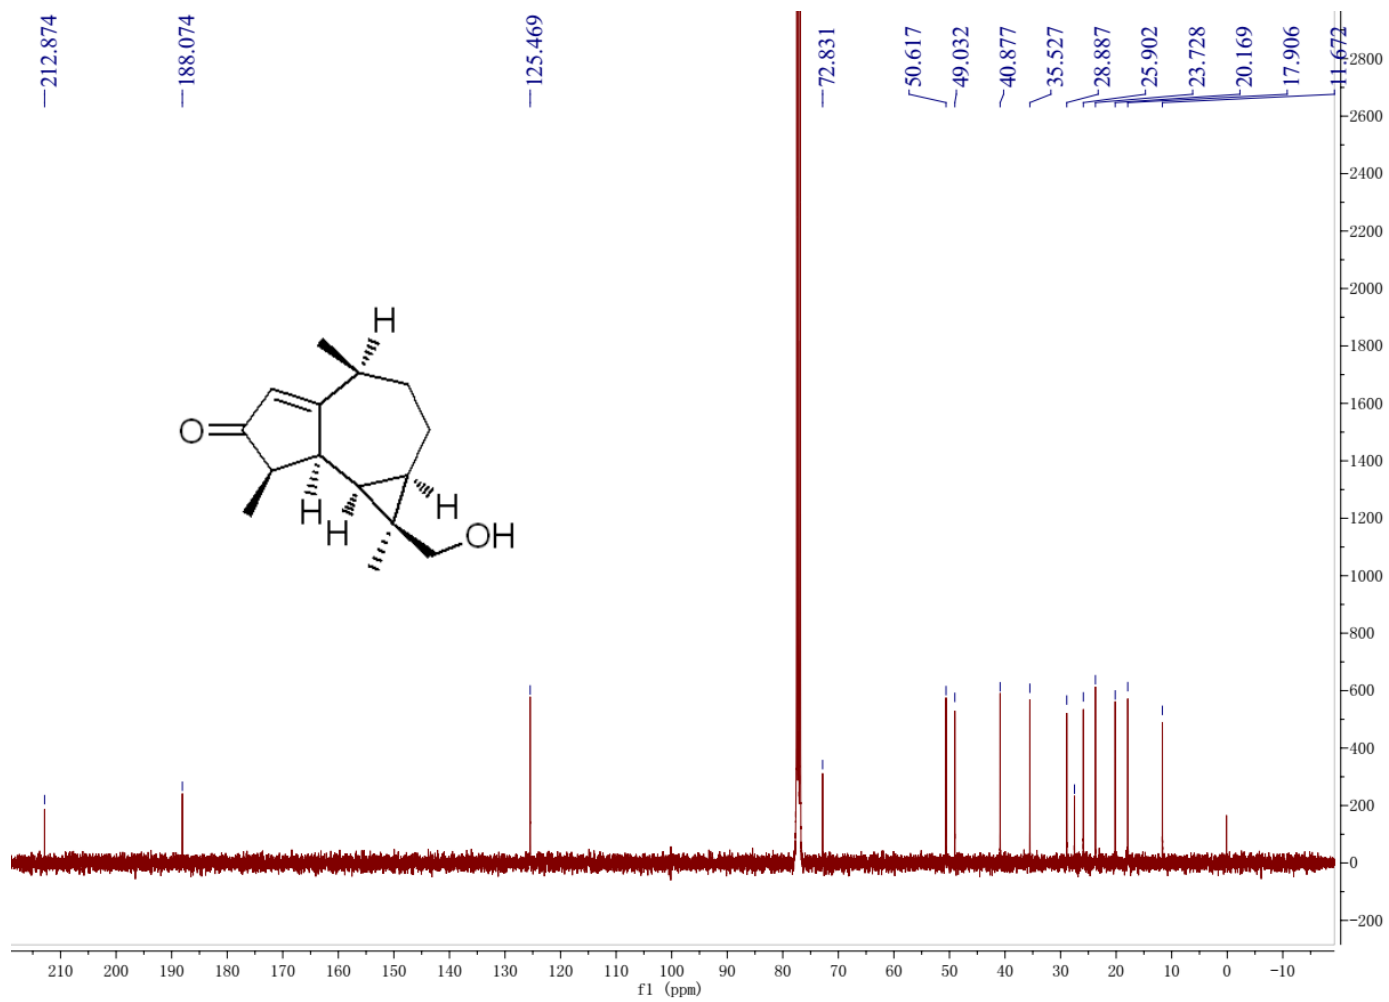

**Figure S33.** HR-ESI-MS spectrum of scedogiine D (6)

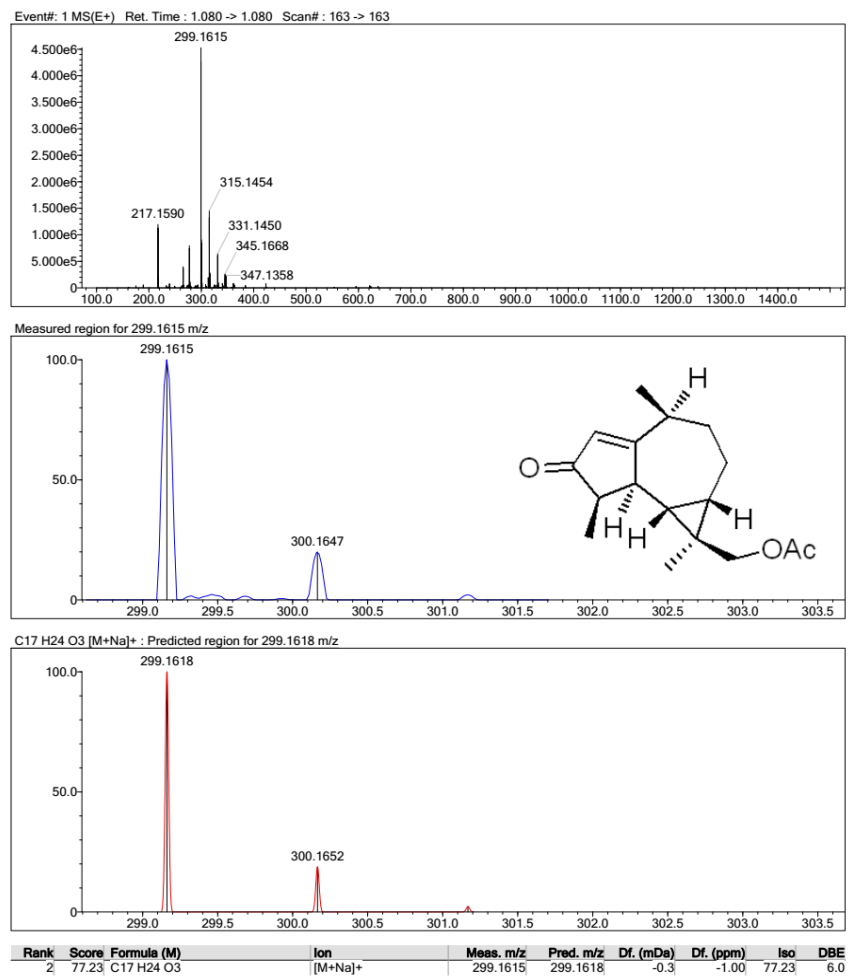

Figure S34. <sup>1</sup>H-NMR spectrum of scedogiine D (**6**) in CDCl<sub>3</sub> (400MHz)

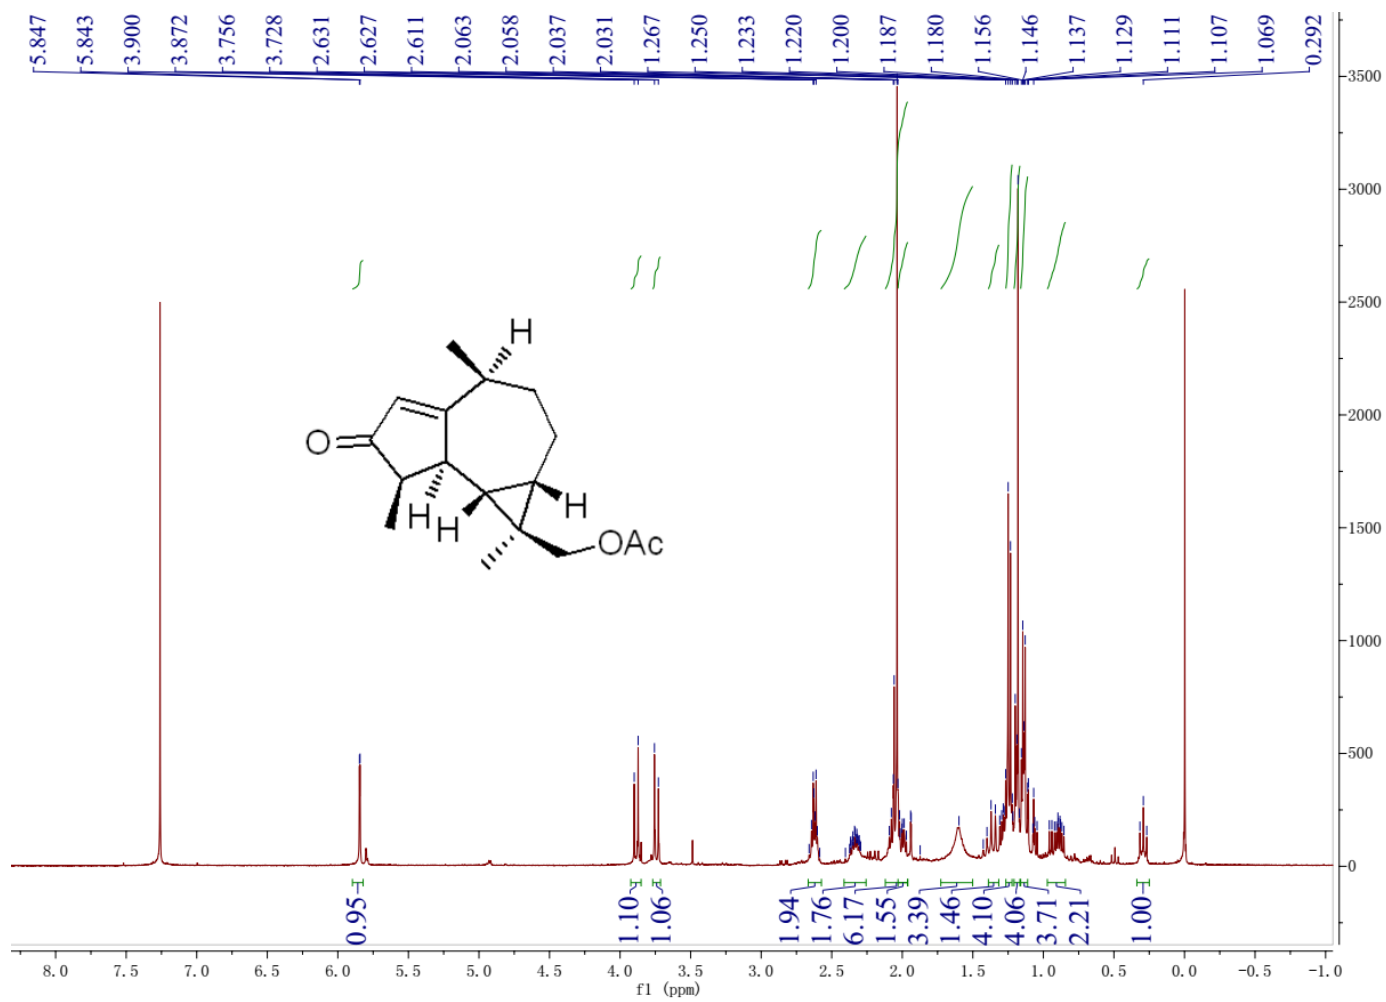

Figure S35.  $^{13}\text{C}$  NMR spectrum of scedogine D (**6**) in  $\text{CDCl}_3$  (100MHz)

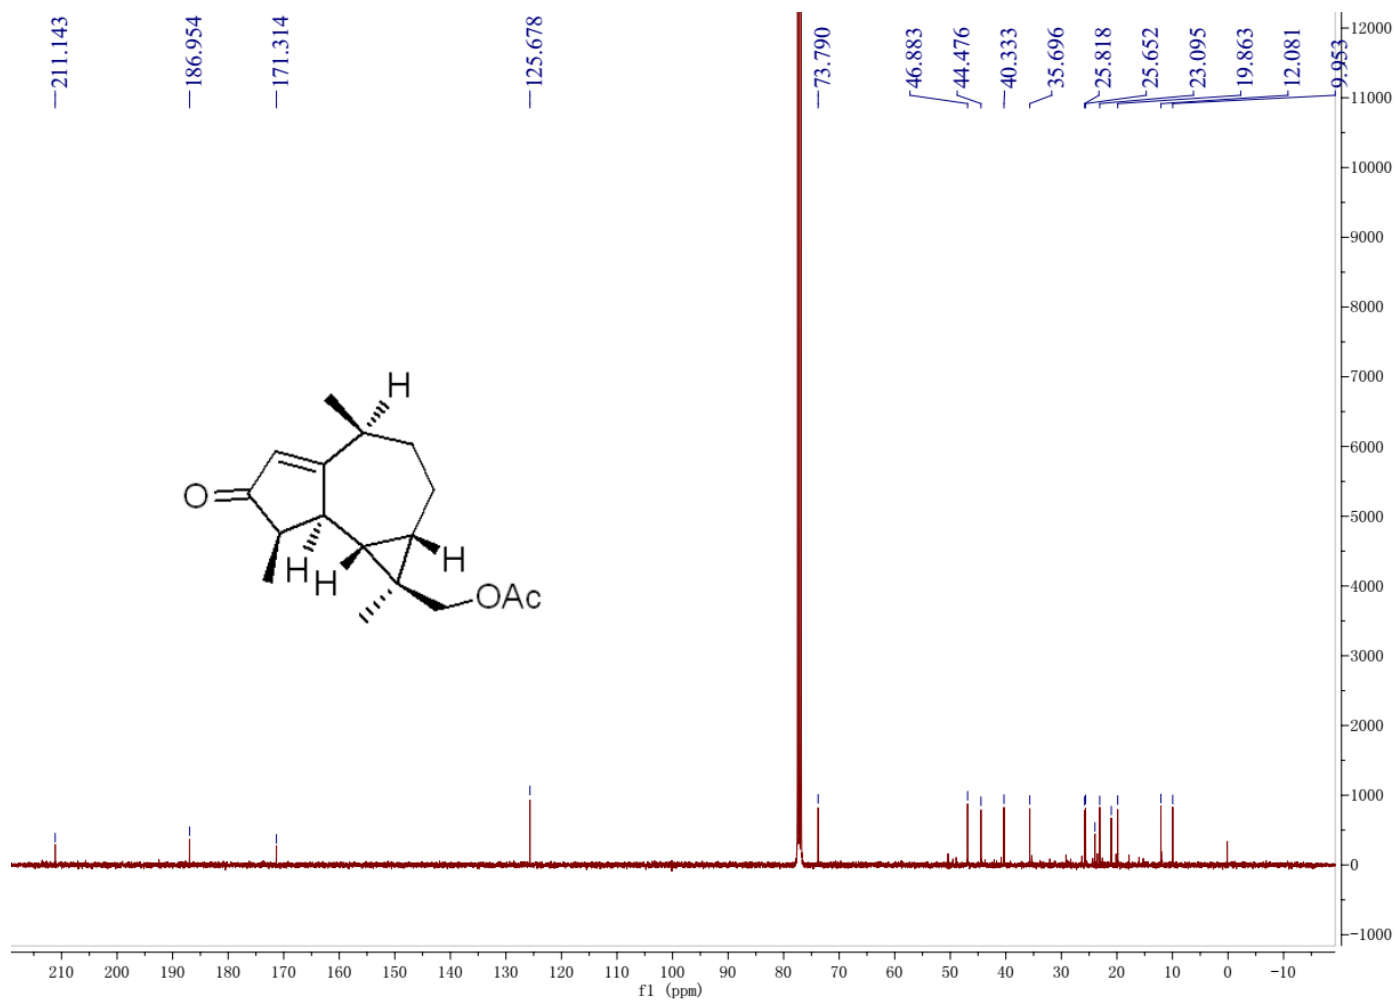

Figure S36. DEPT 135 spectrum of scedogiine D (**6**) in CDCl<sub>3</sub> (100MHz)

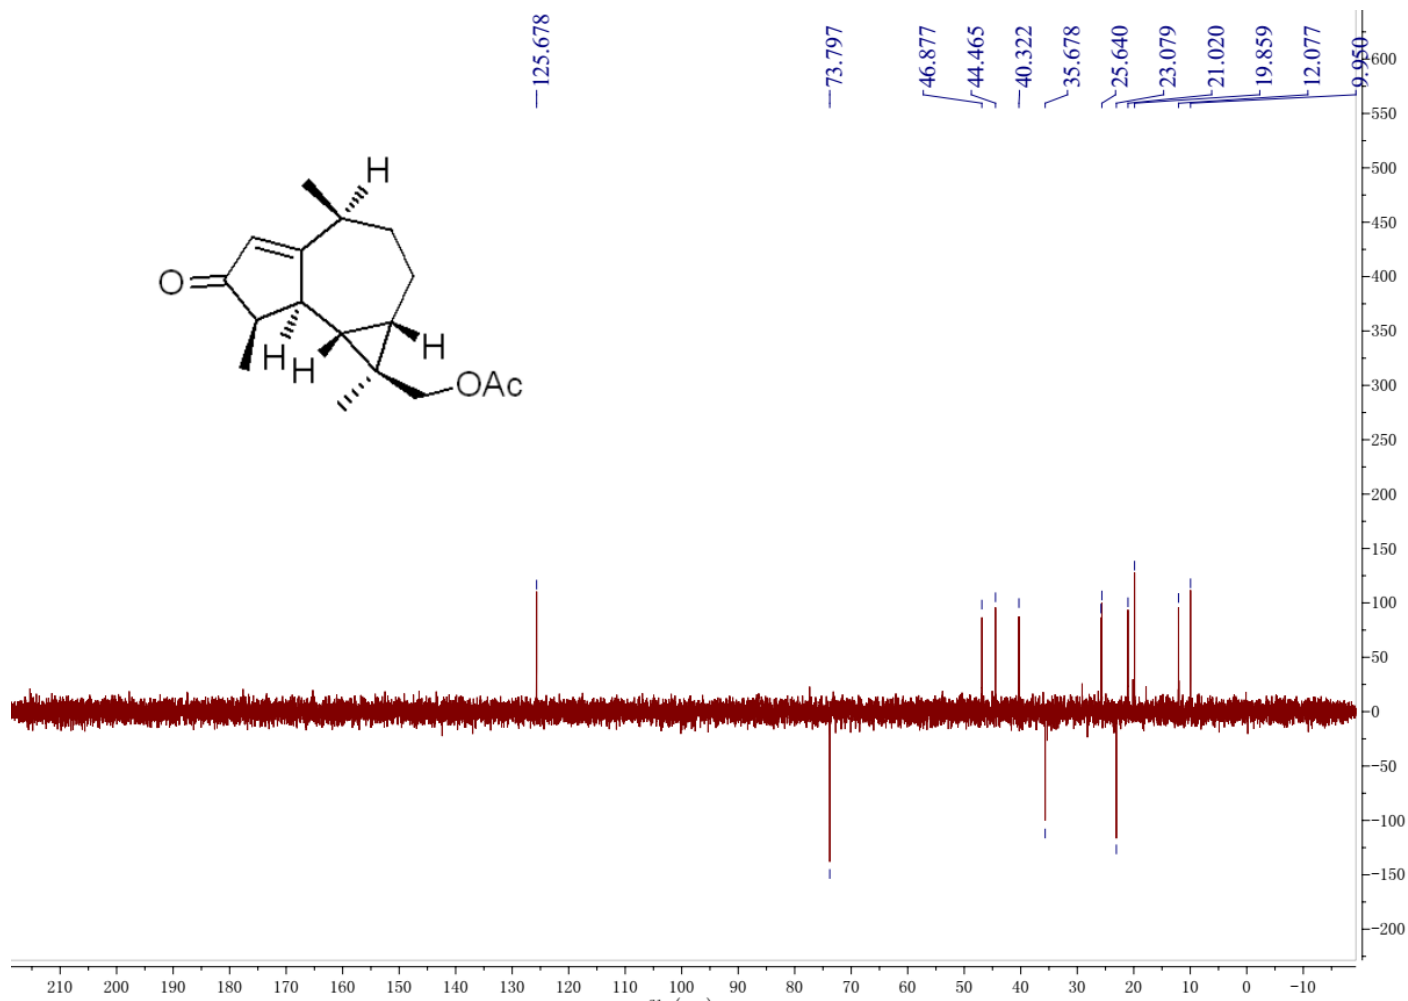

Figure S37. HMQC spectrum of scedogine D (6) in CDCl<sub>3</sub>

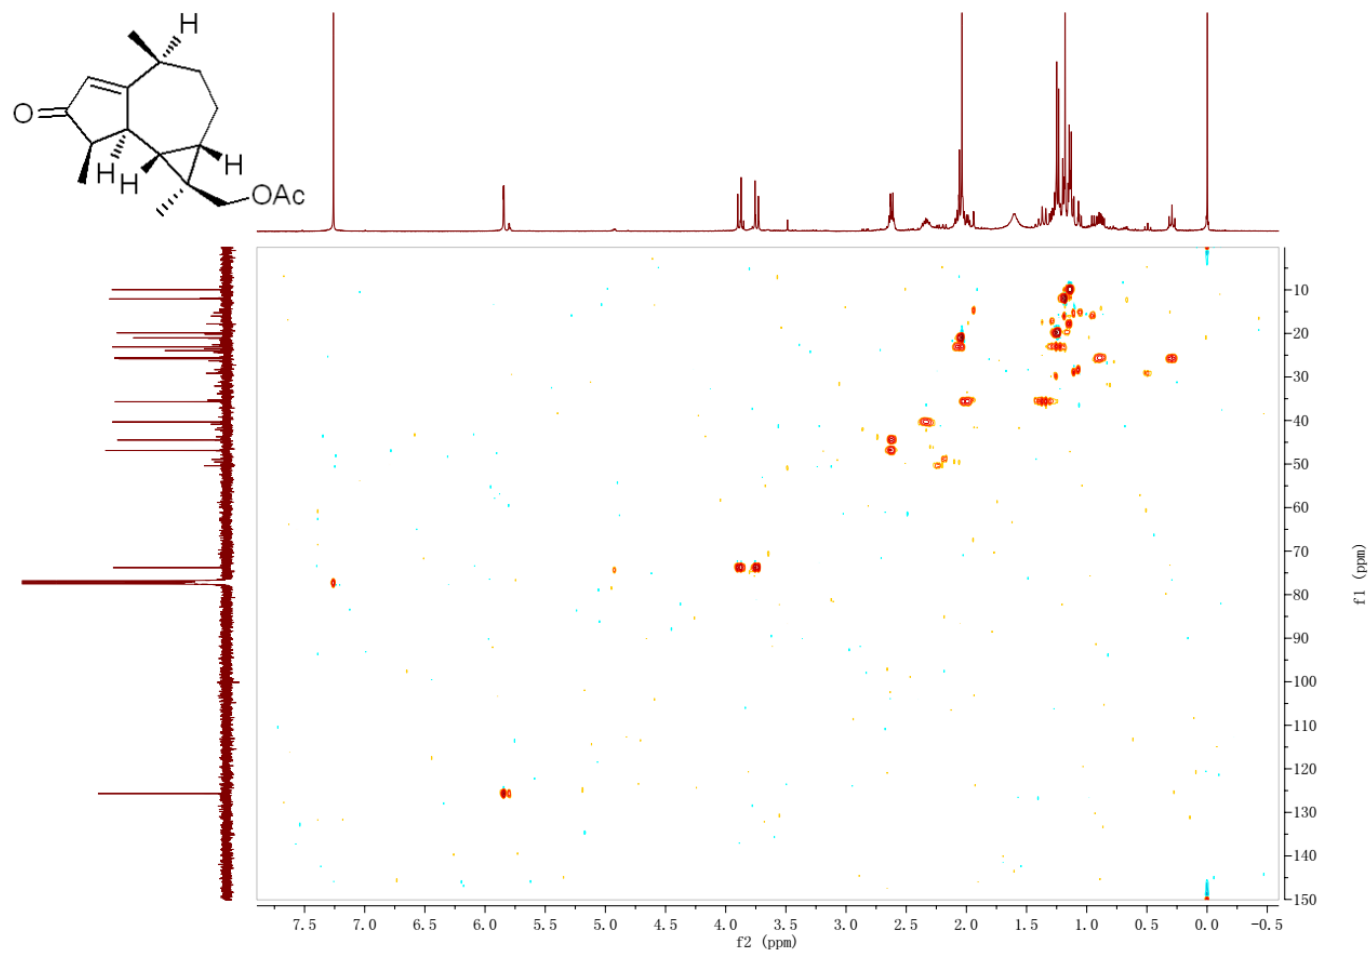

Figure S38.  $^1\text{H}$ - $^1\text{H}$  COSY spectrum of scedogine D (**6**) in  $\text{CDCl}_3$

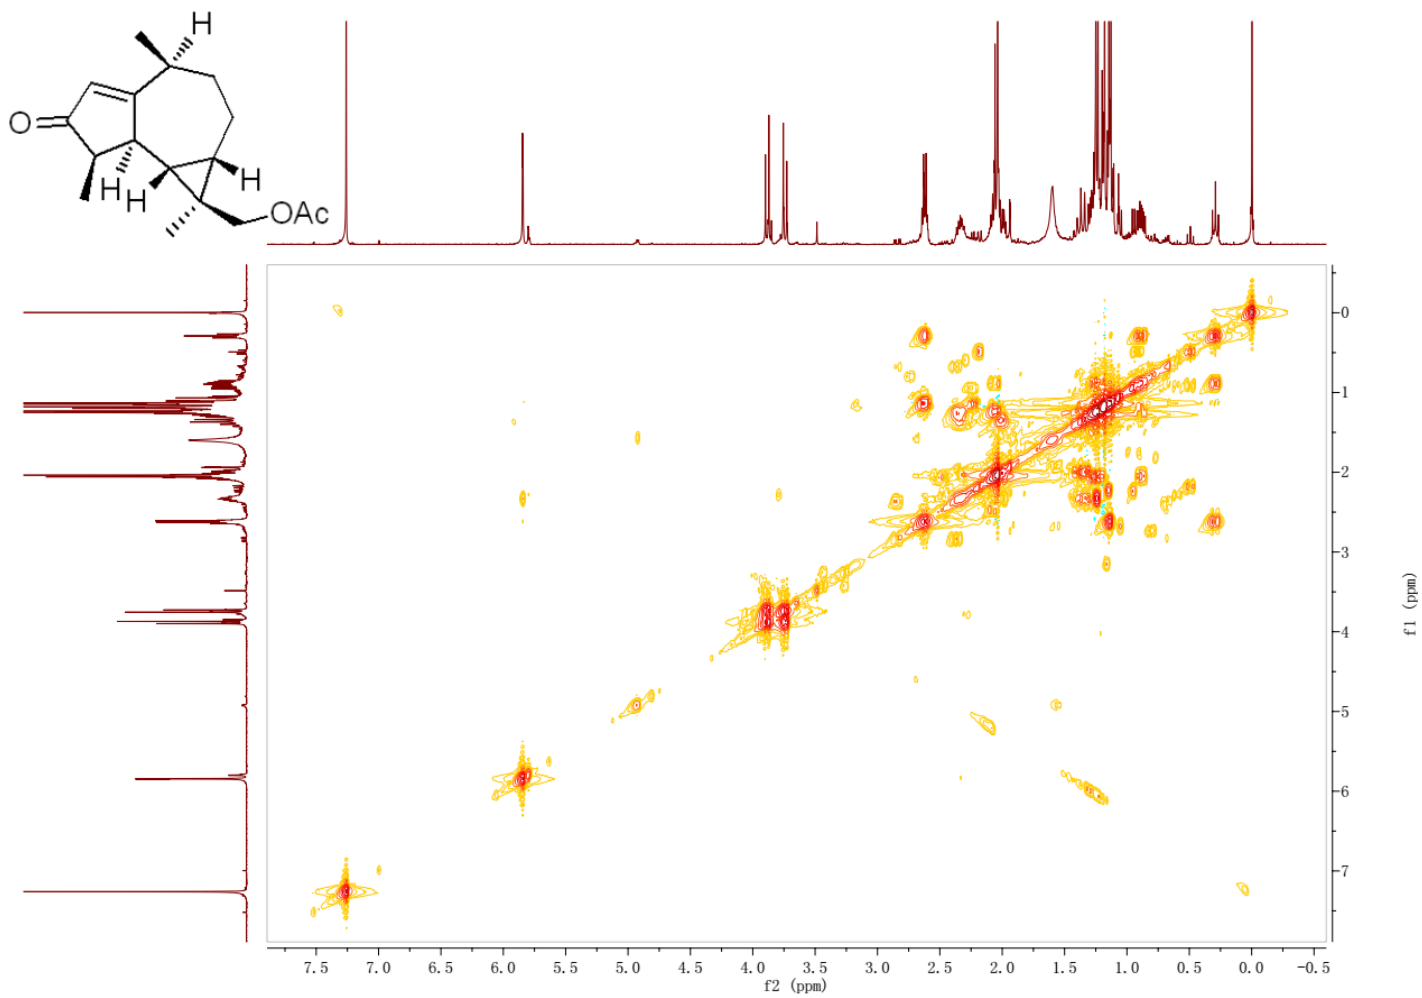



Figure S39. HMBC spectrum of scedogine D (6) in CDCl<sub>3</sub>

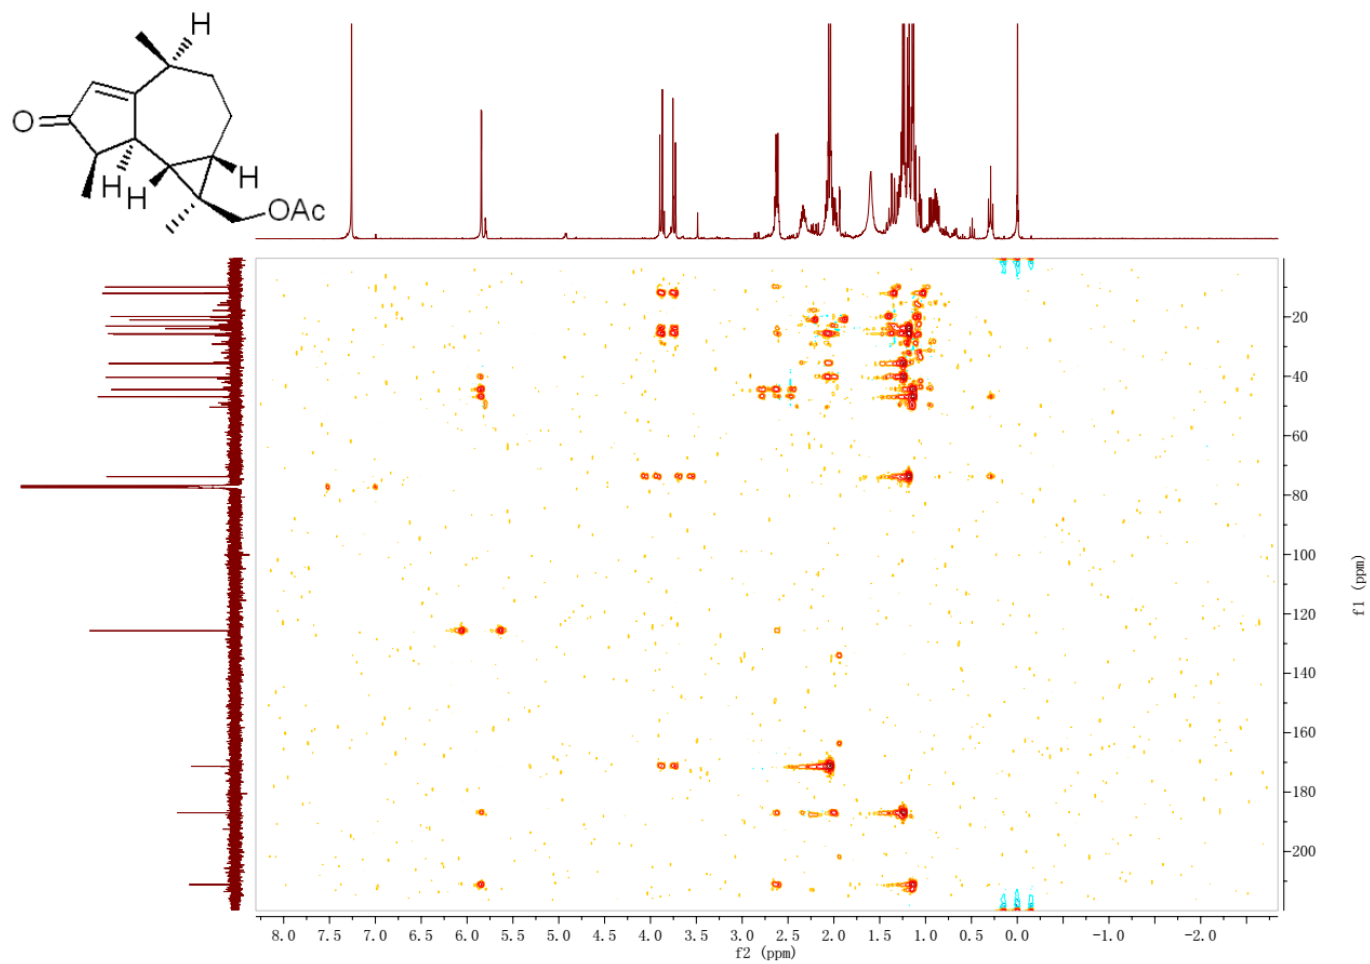

Figure S40. NOESY spectrum of scedogiine D (**6**) in CDCl<sub>3</sub>

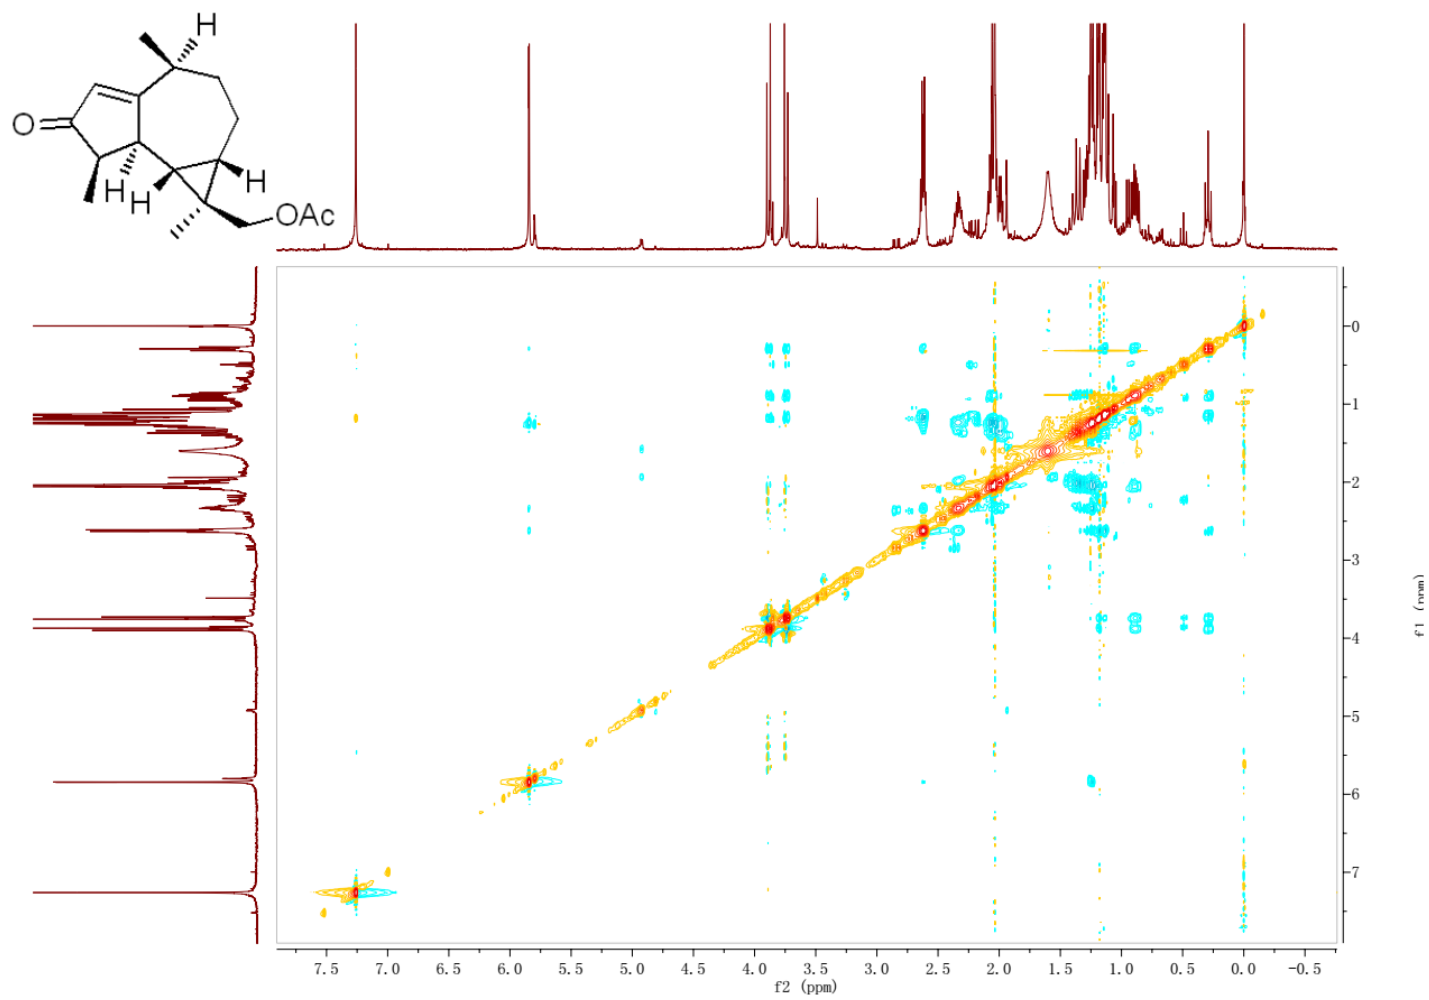

Figure S41. HR-ESI-MS spectrum of scedogiine E (7)

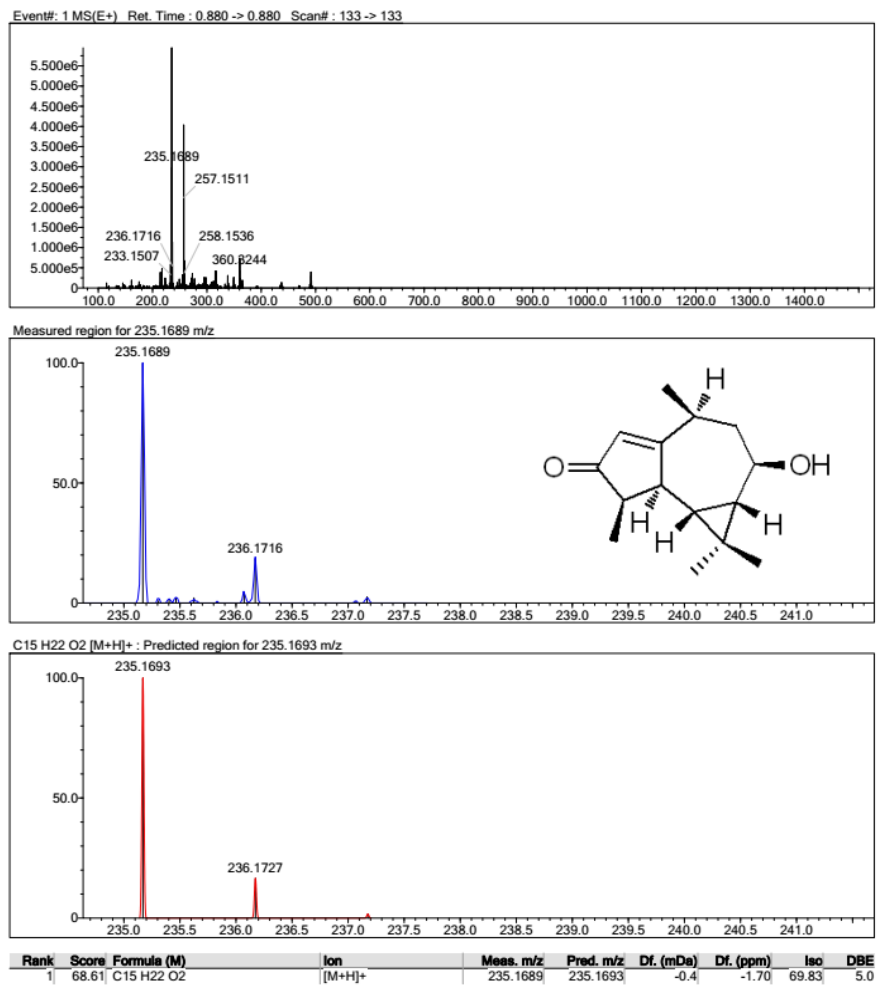

Figure S42. <sup>1</sup>H-NMR spectrum of scedogiine E (7) in CDCl<sub>3</sub> (400MHz)

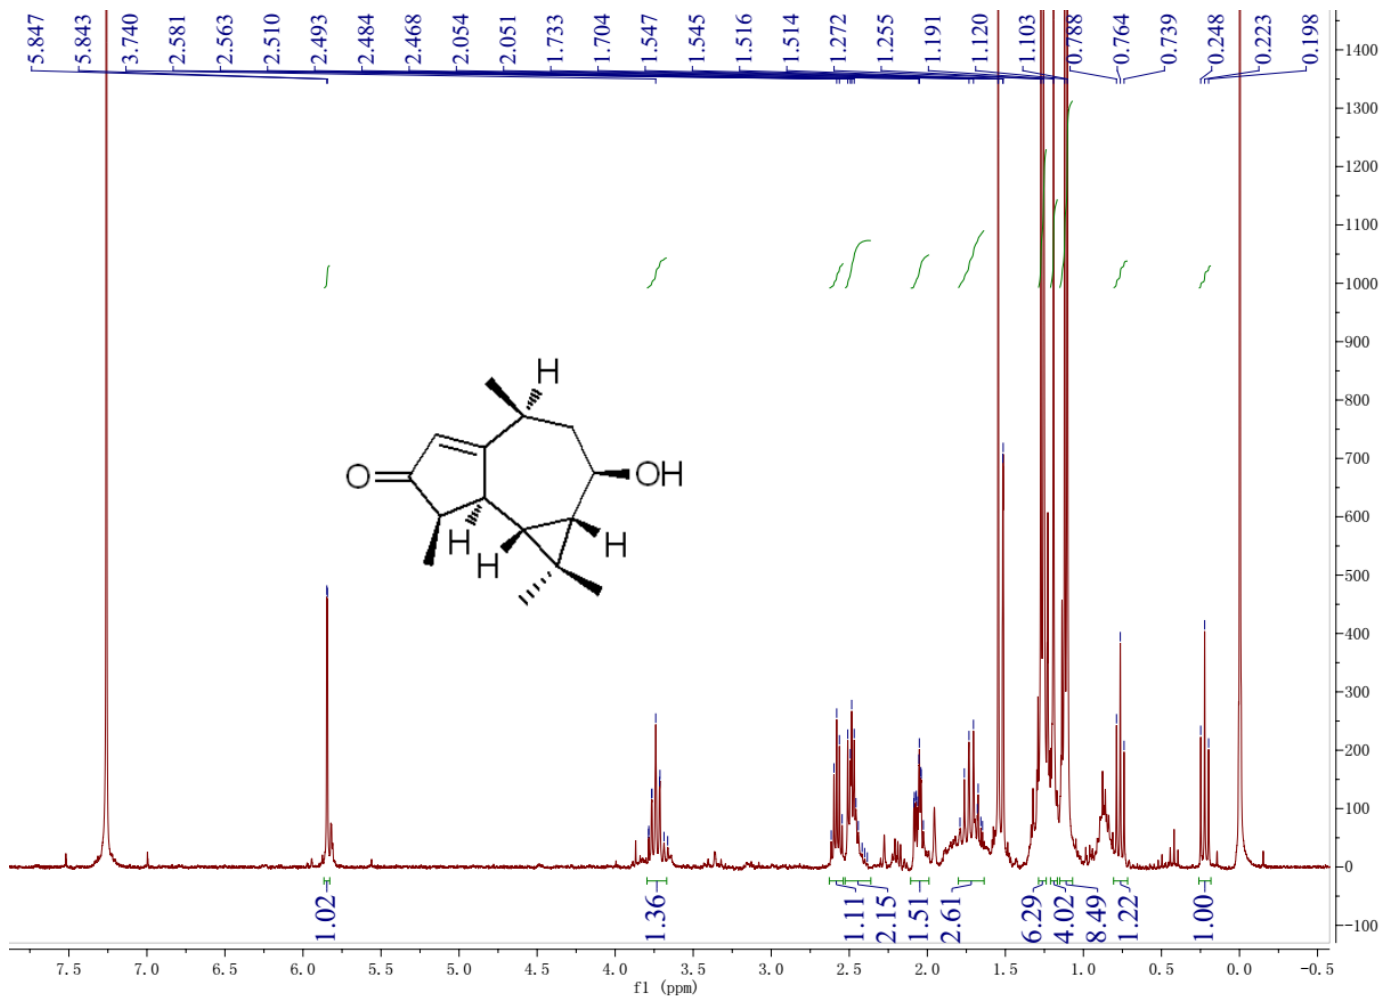

**Figure S43.**  $^{13}\text{C}$  NMR spectrum of scedogine E (**7**) in  $\text{CDCl}_3$  (100MHz)

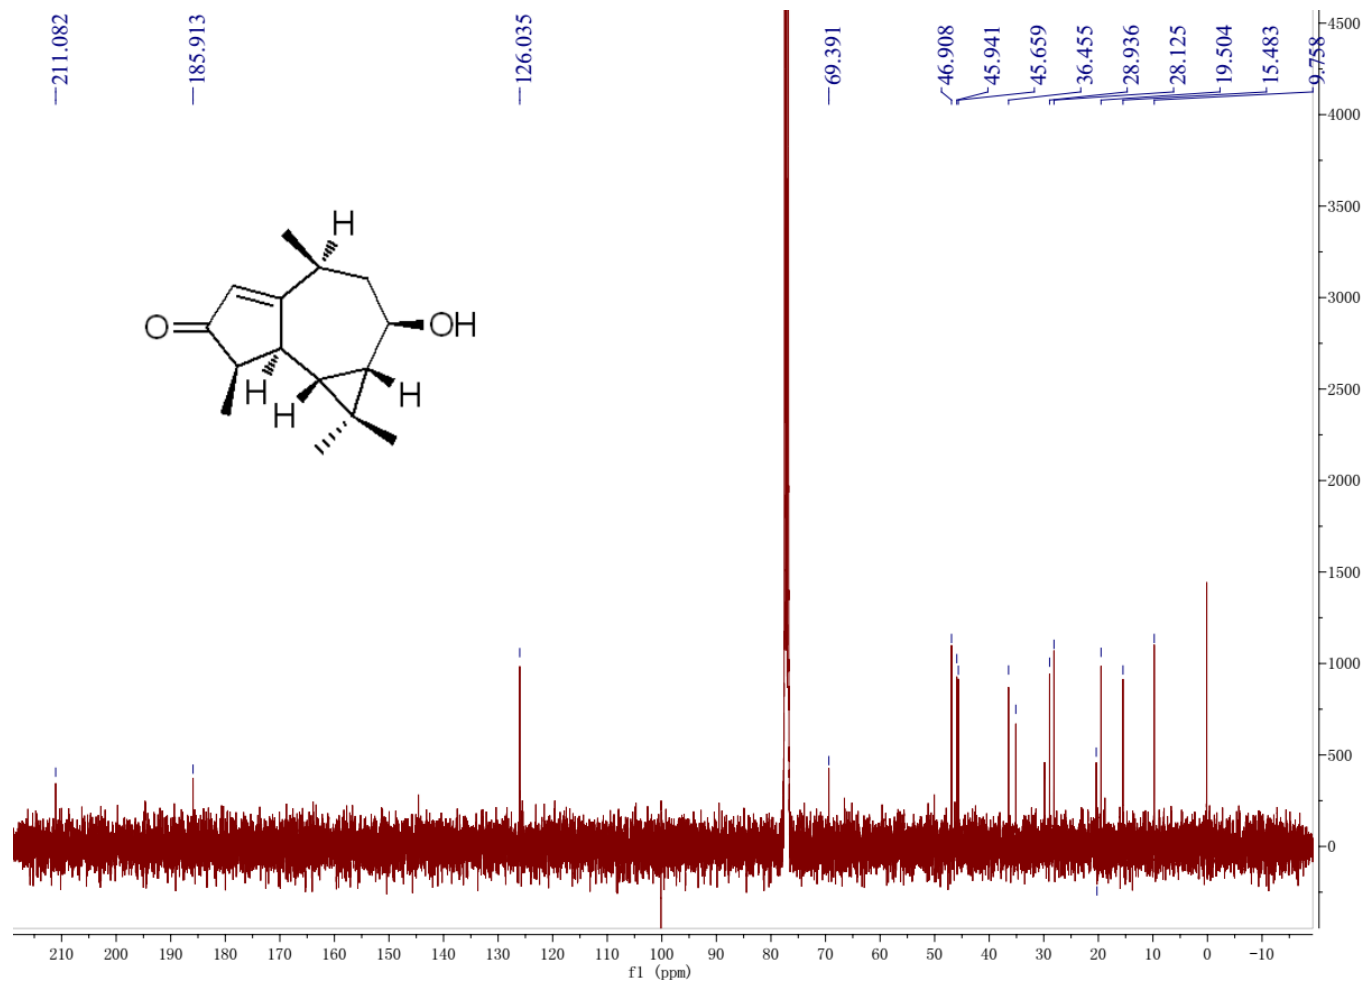

Figure S44. DEPT 135 spectrum of scedogiine E (7) in CDCl<sub>3</sub> (100MHz)

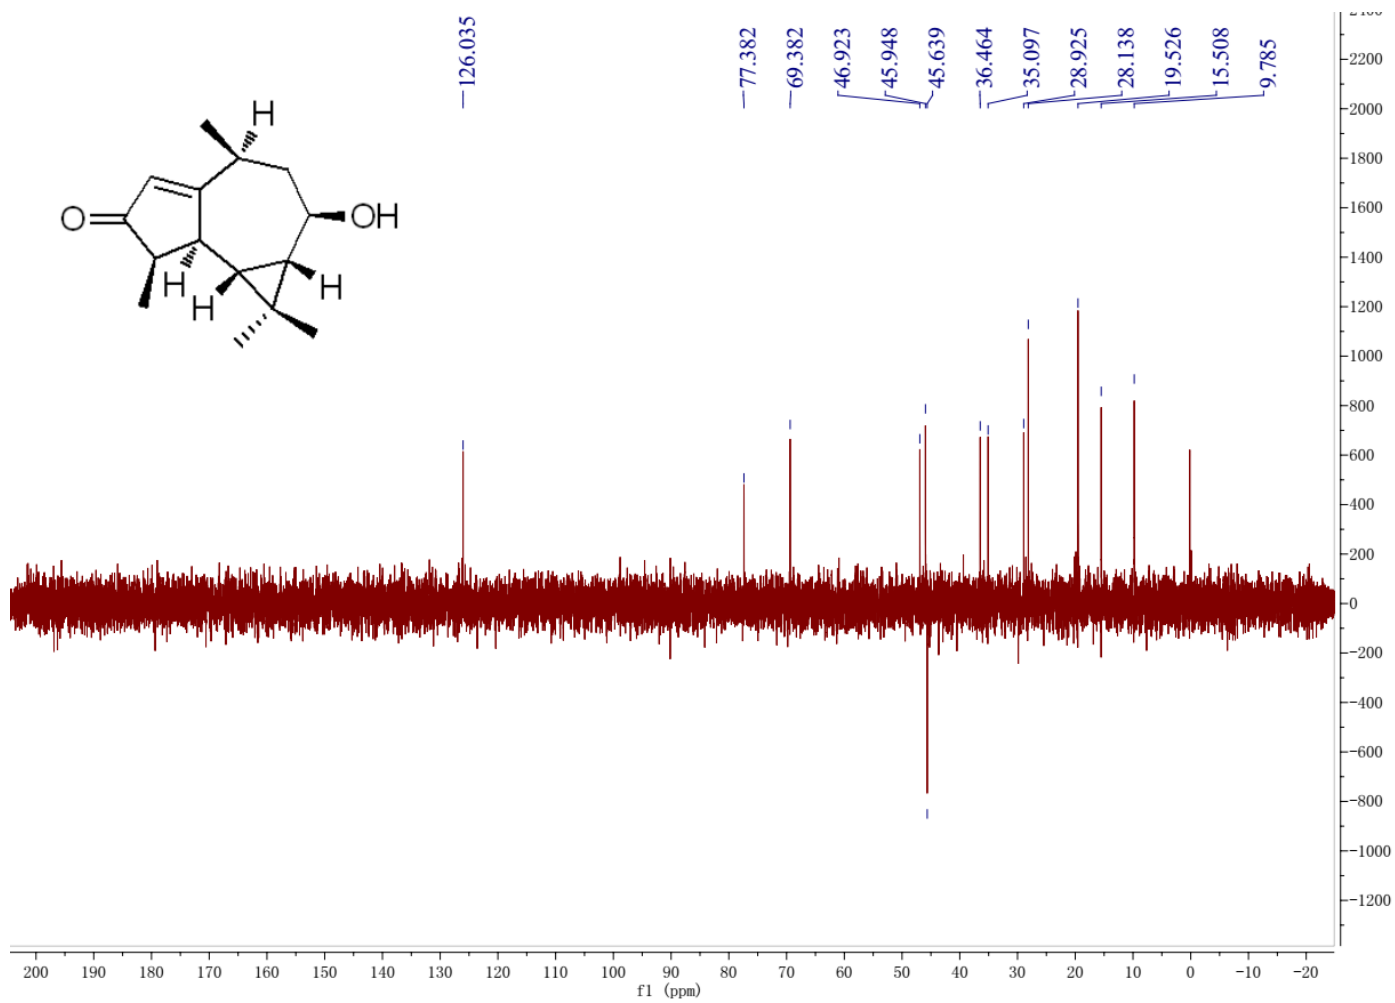

Figure S45. HMQC spectrum of scedogine E (7) in CDCl<sub>3</sub>

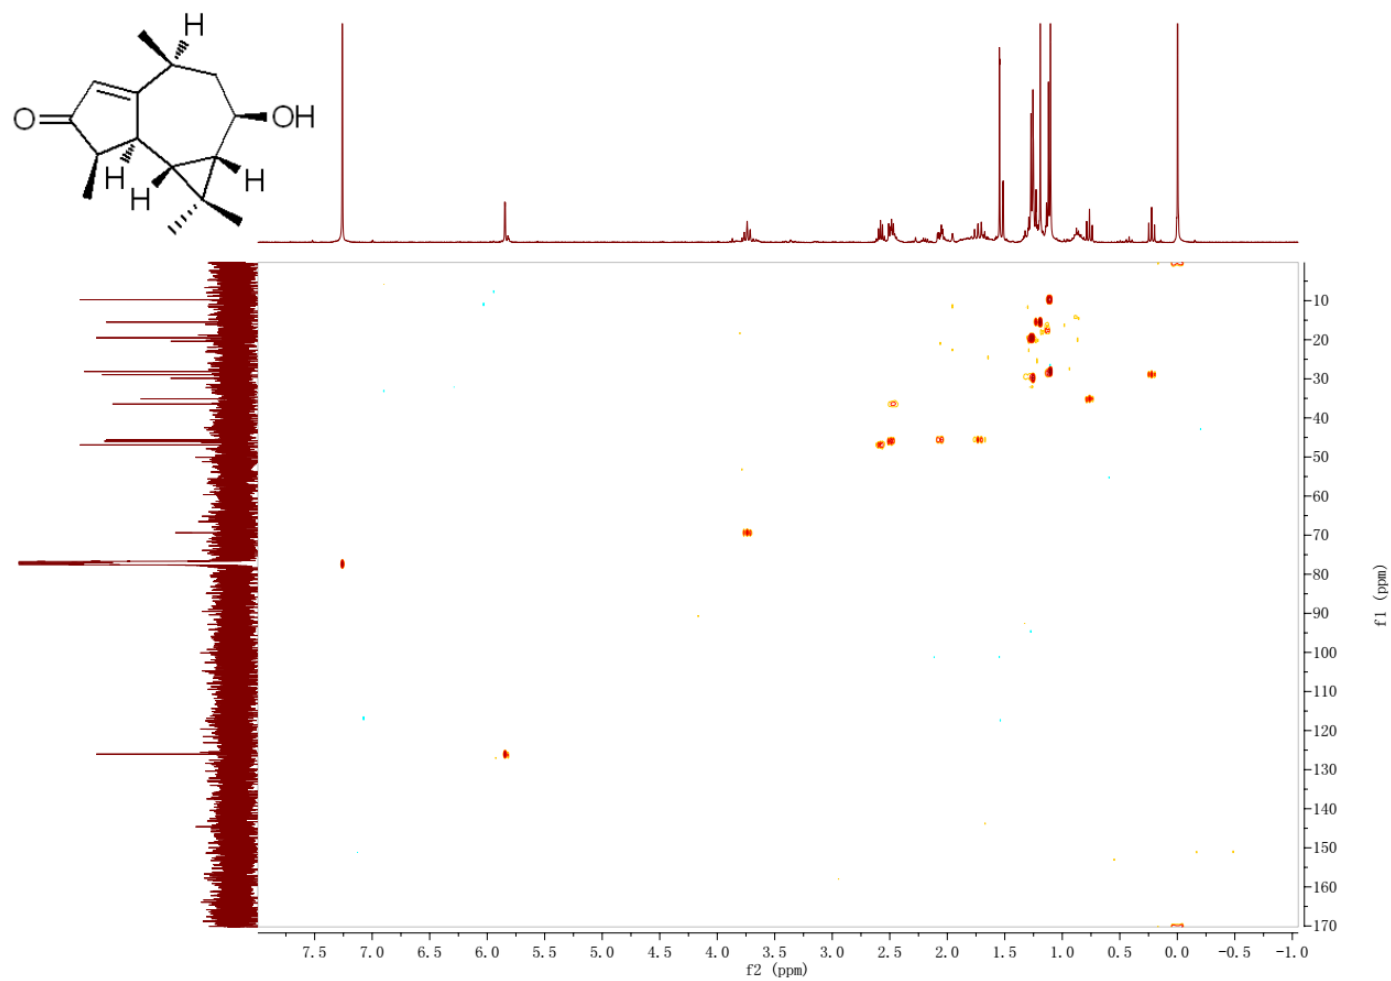

Figure S46.  $^1\text{H}$ - $^1\text{H}$  COSY spectrum of scedogine E (7) in  $\text{CDCl}_3$

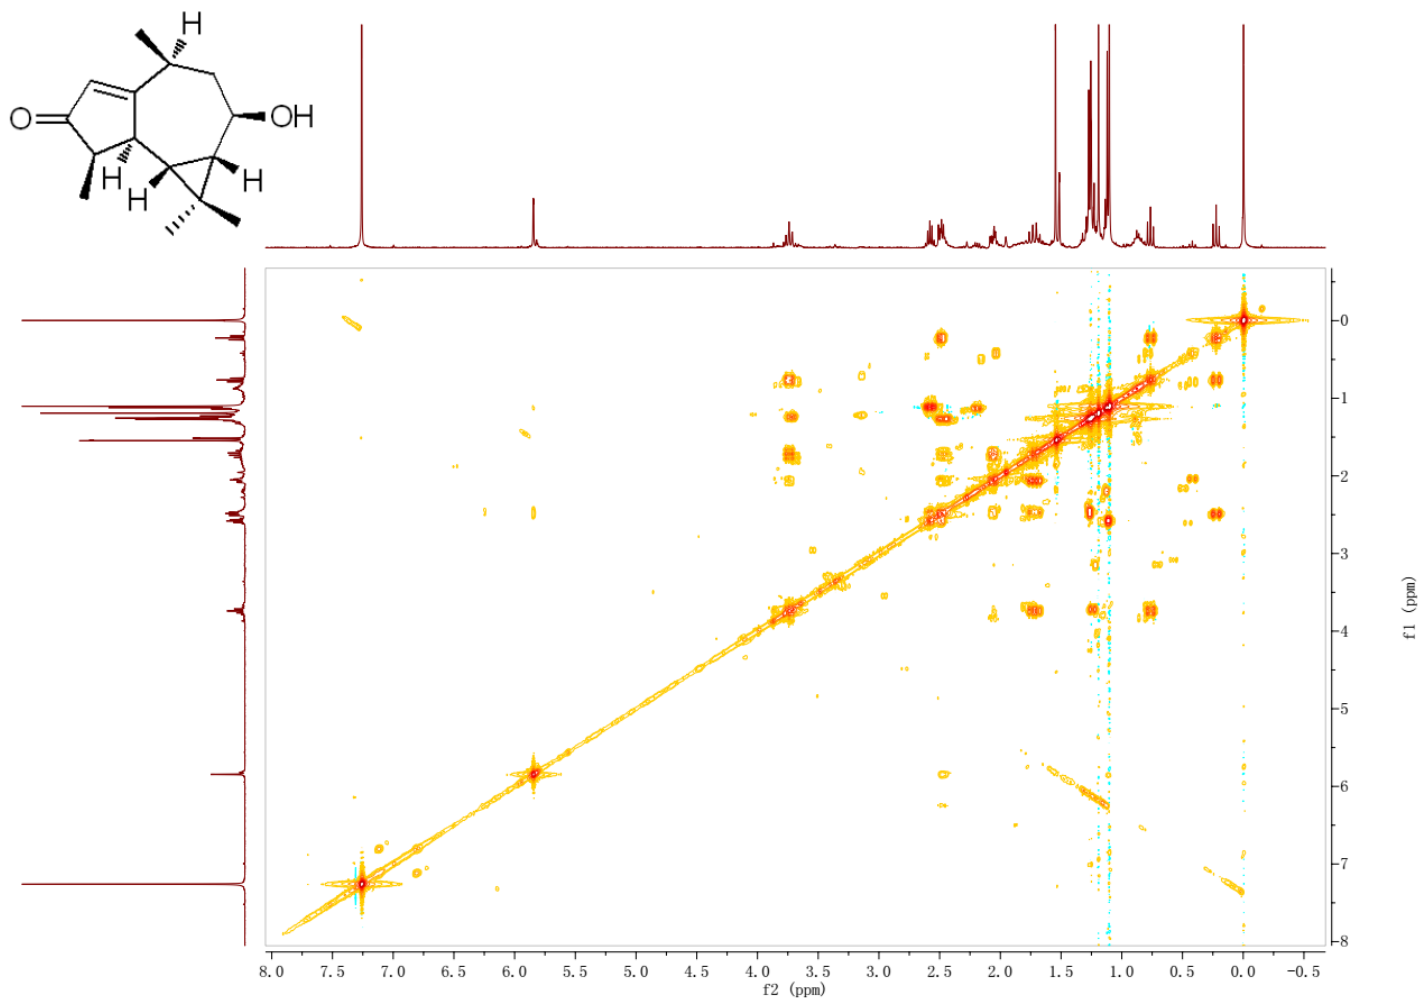



Figure S47. HMBC spectrum of scedogine E (7) in CDCl<sub>3</sub>

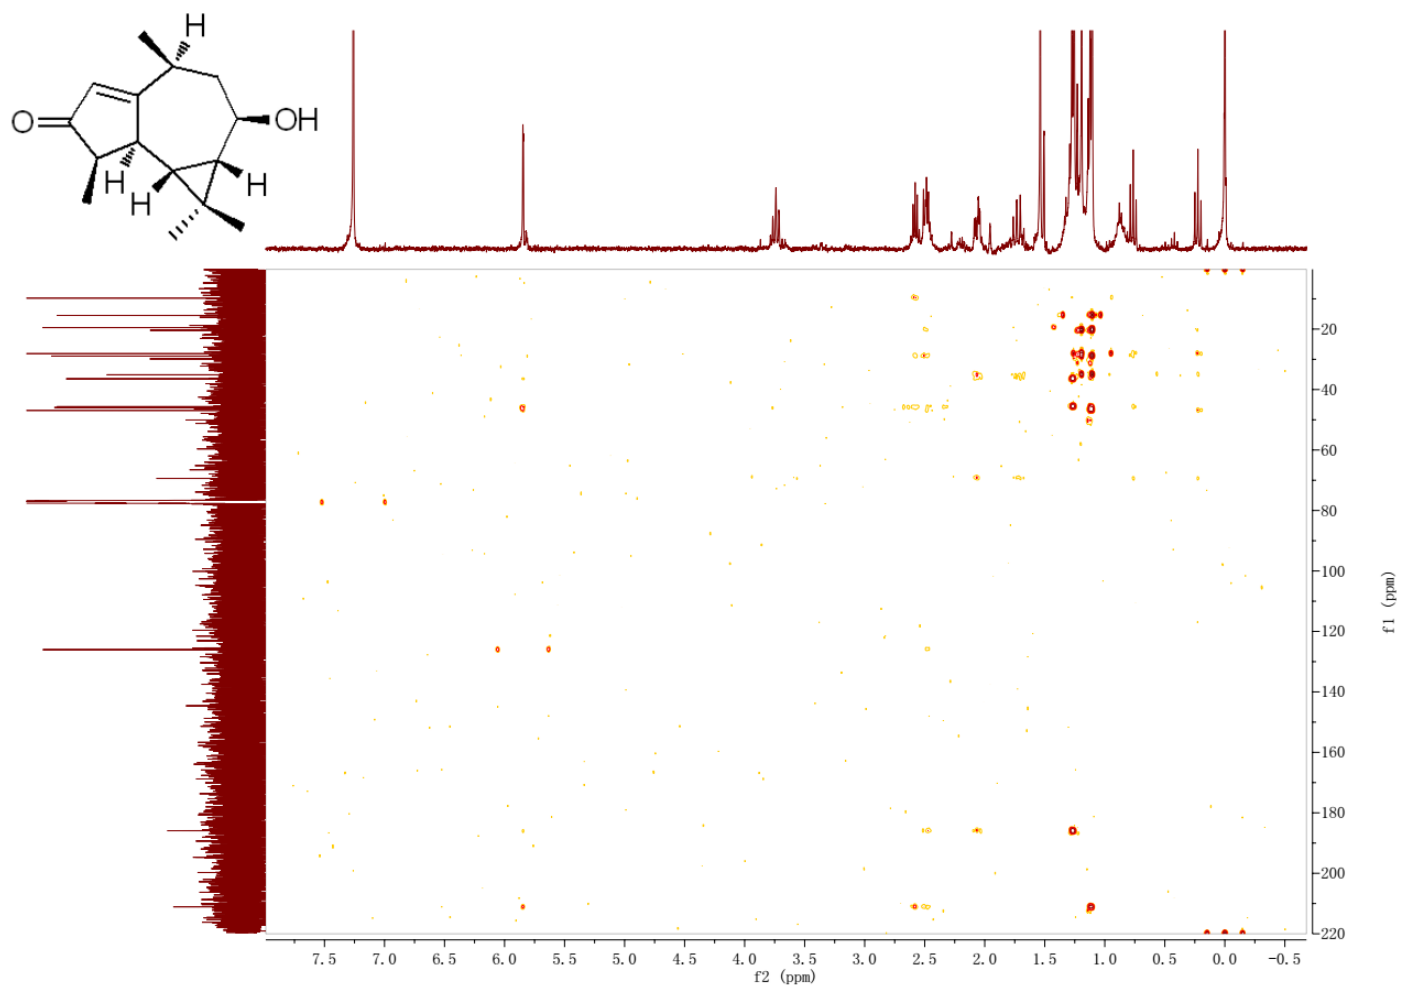

Figure S48. NOESY spectrum of scedogiine E (7) in CDCl<sub>3</sub>

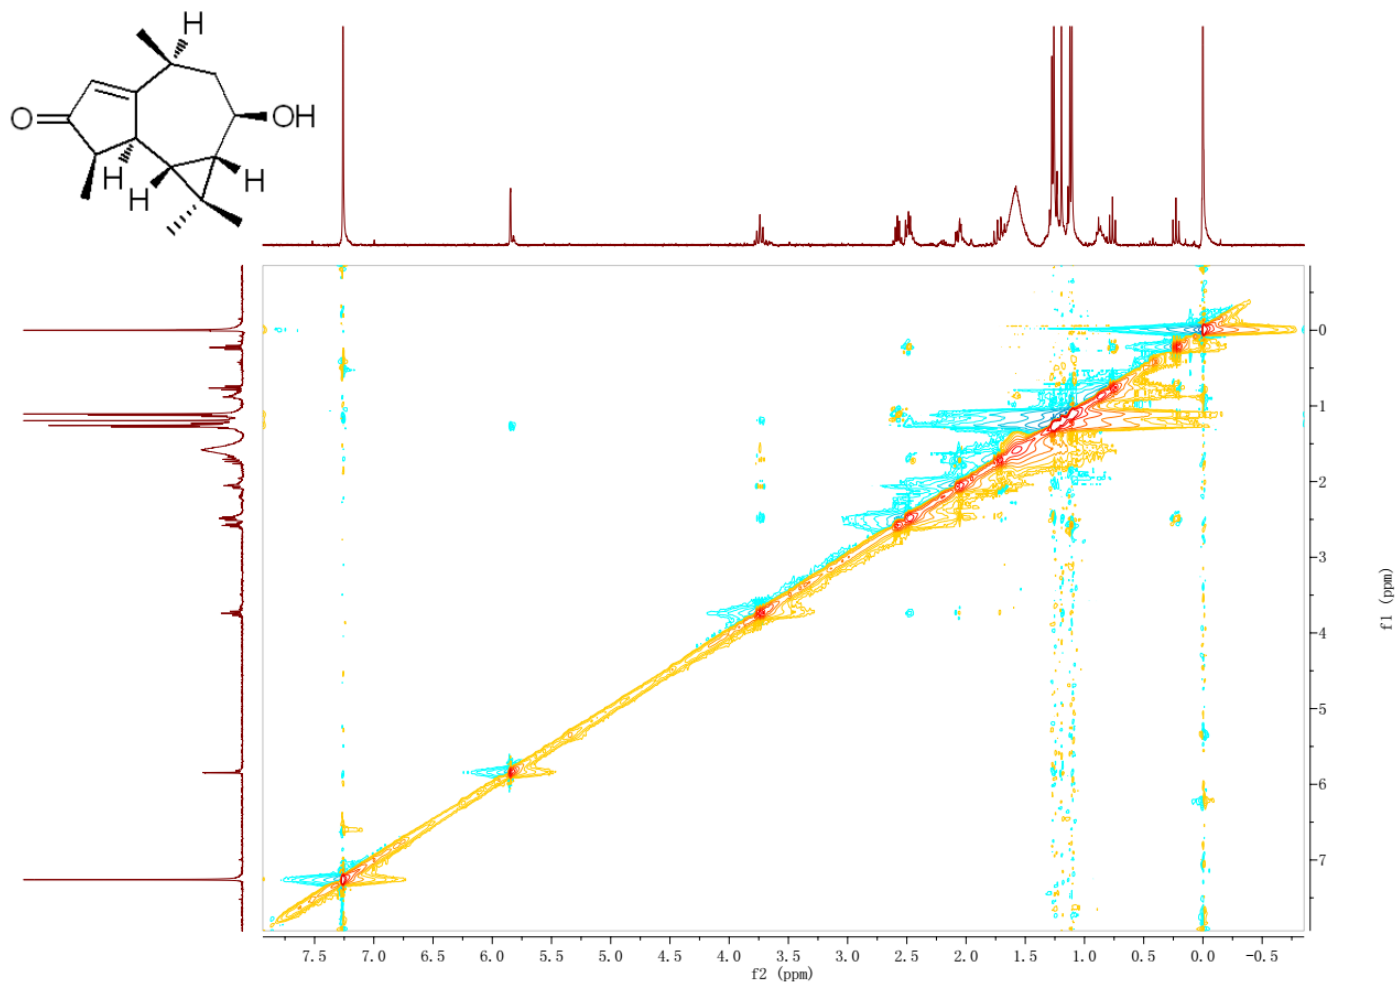

Figure S49. HR-ESI-MS spectrum of scedogiine F (8)

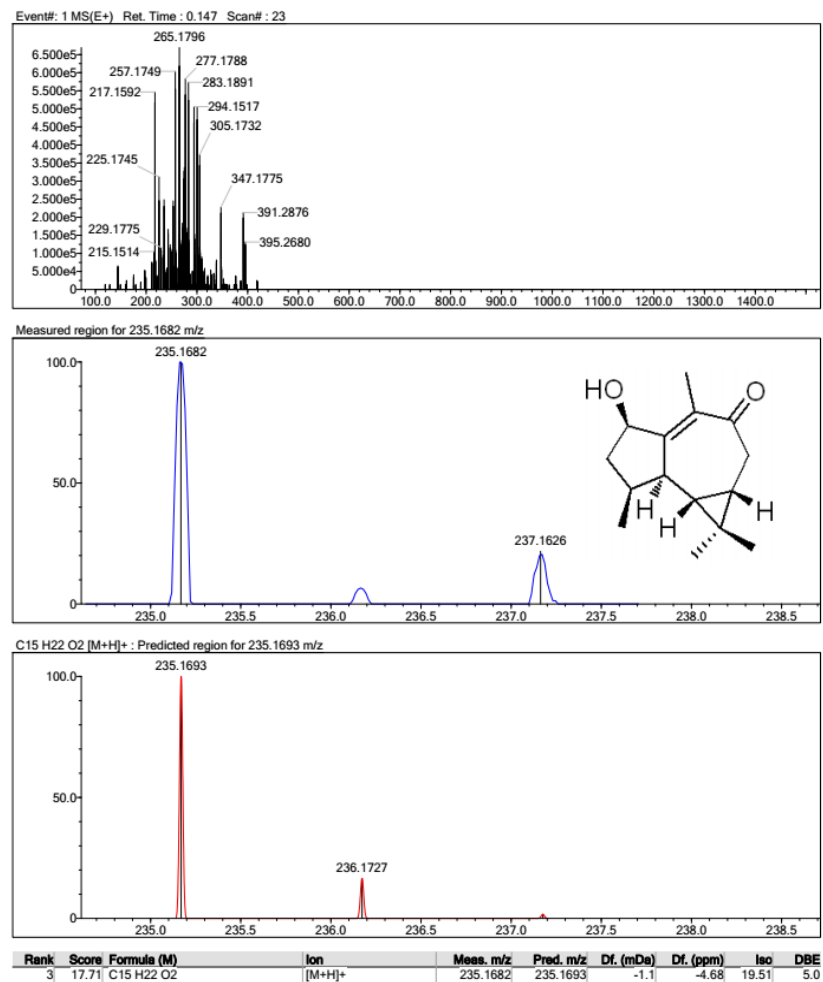

Figure S50. <sup>1</sup>H-NMR spectrum of scedogine F (8) in CDCl<sub>3</sub> (400MHz)

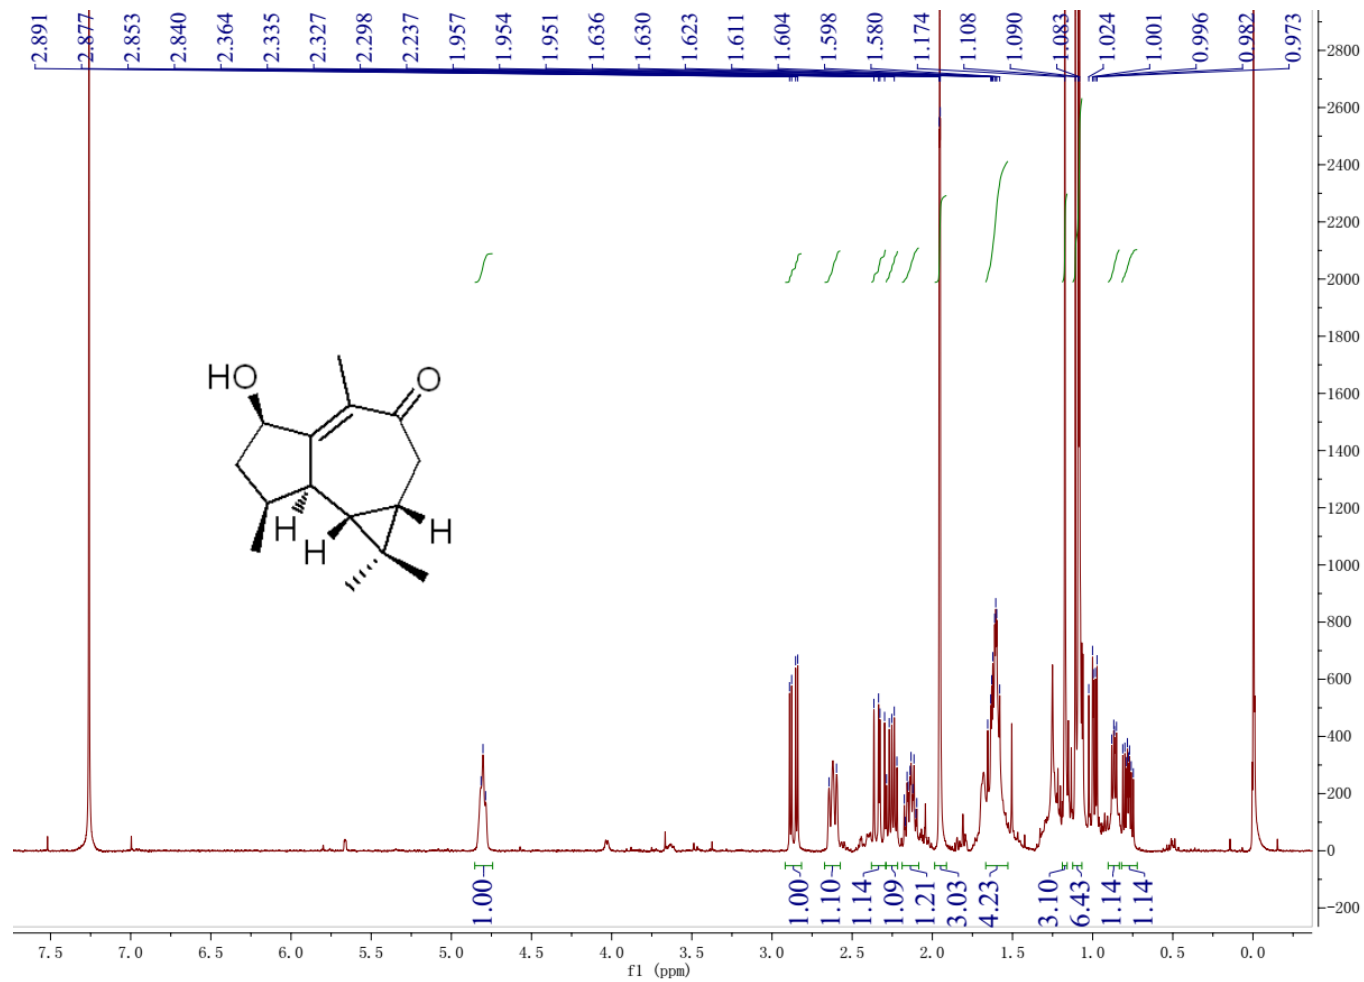

Figure S51.  $^{13}\text{C}$  NMR spectrum of scedogine F (**8**) in  $\text{CDCl}_3$  (100MHz)

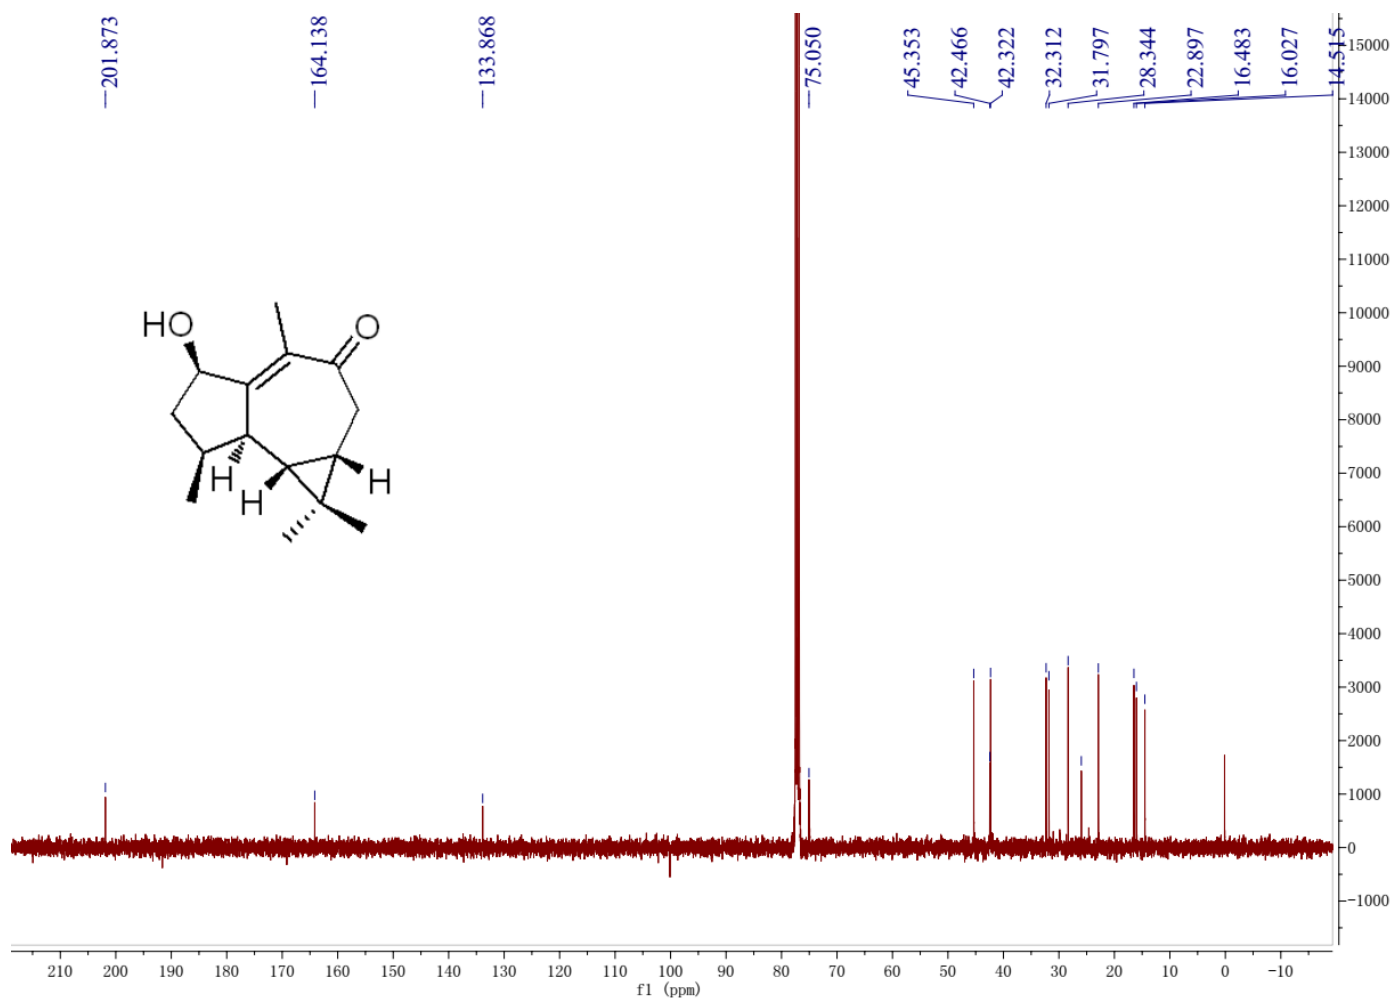

Figure S52. HMQC spectrum of scedogiine F (**8**) in CDCl<sub>3</sub>

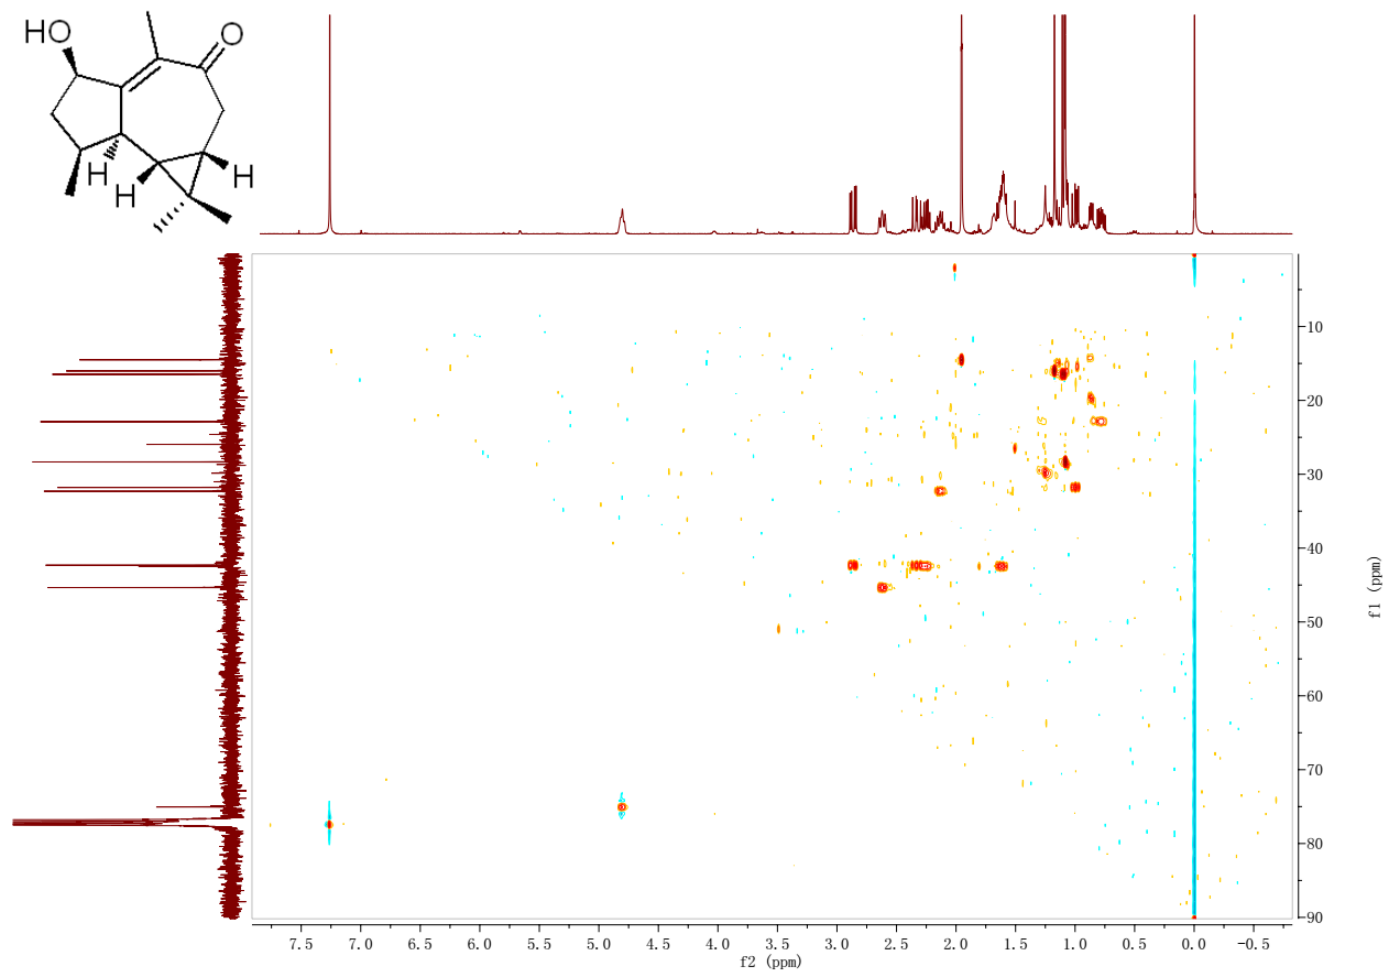

Figure S53.  $^1\text{H}$ - $^1\text{H}$  COSY spectrum of scedogine F (**8**) in  $\text{CDCl}_3$

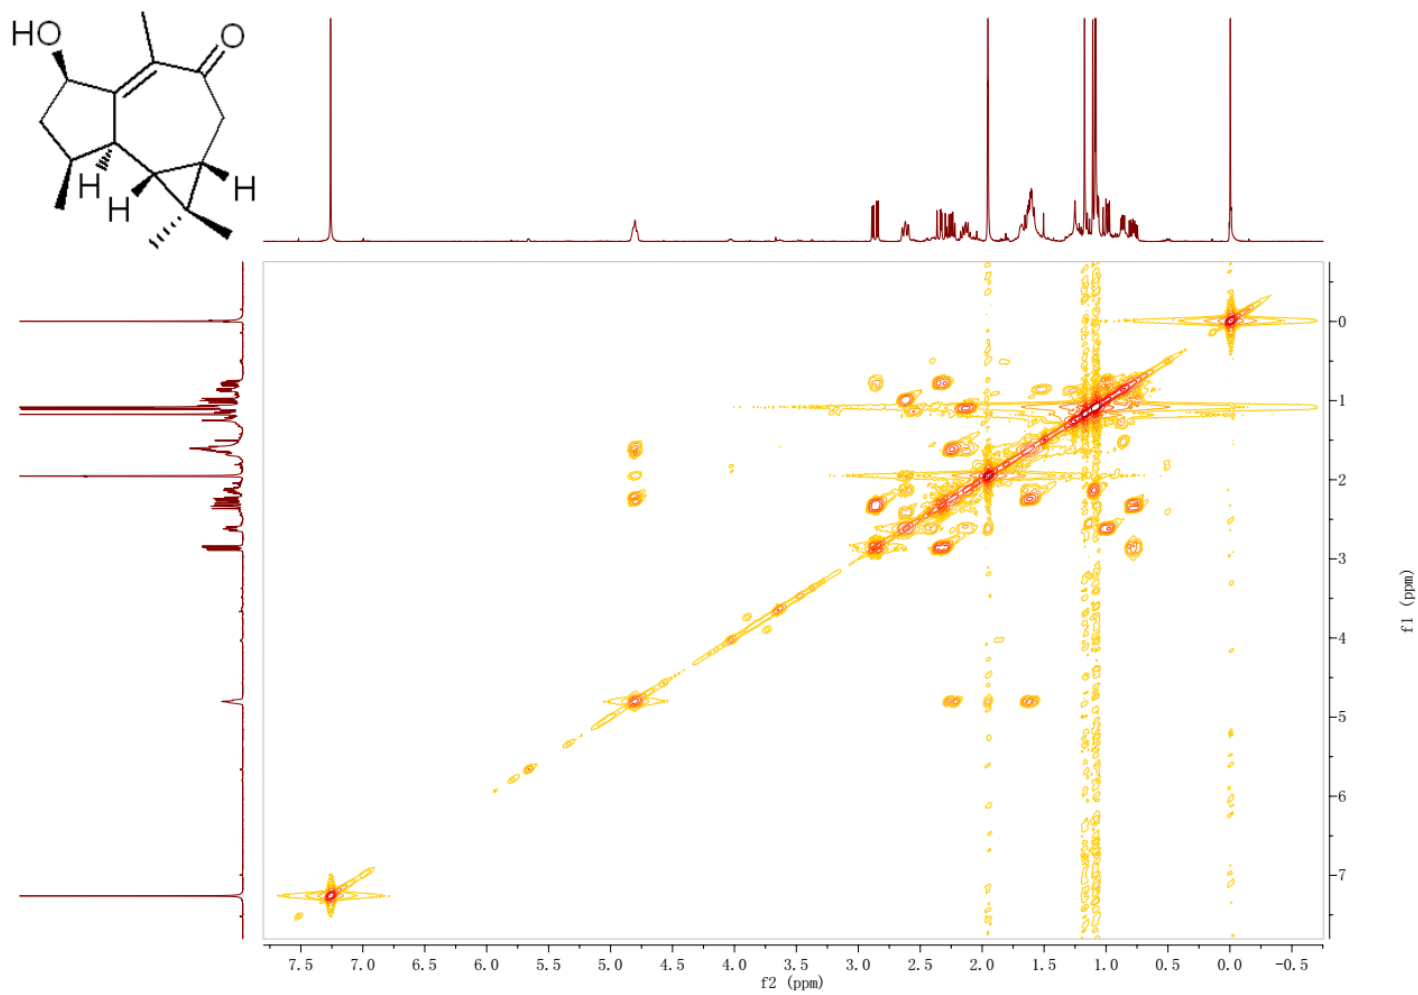

Figure S54. HMBC spectrum of scedogine F (**8**) in CDCl<sub>3</sub>

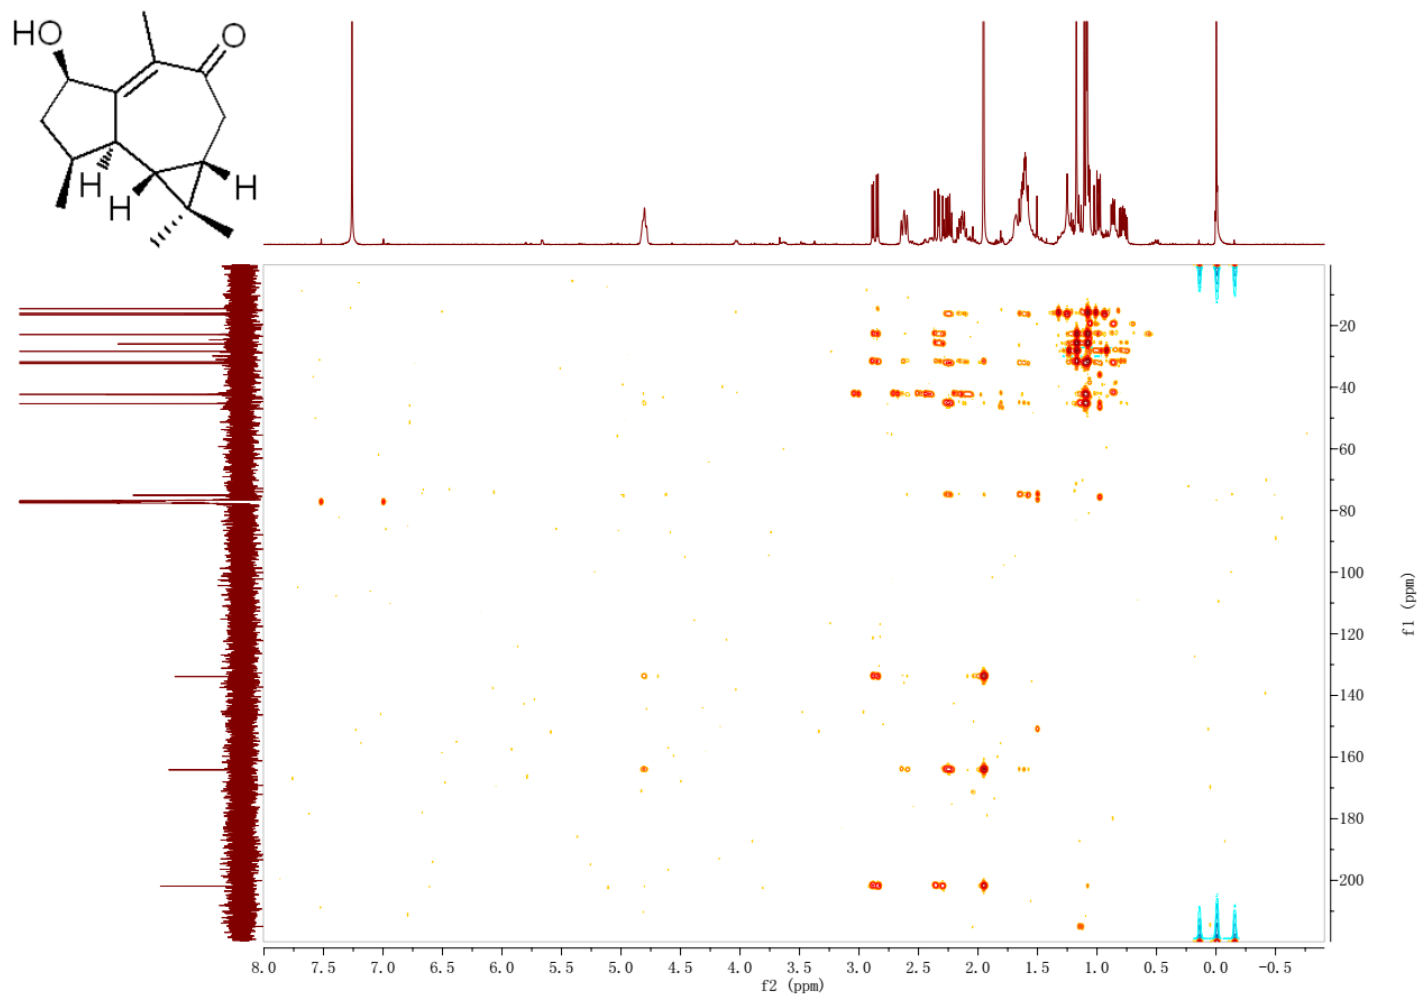



Figure S55. NOESY spectrum of scedogiine F (**8**) in CDCl<sub>3</sub>

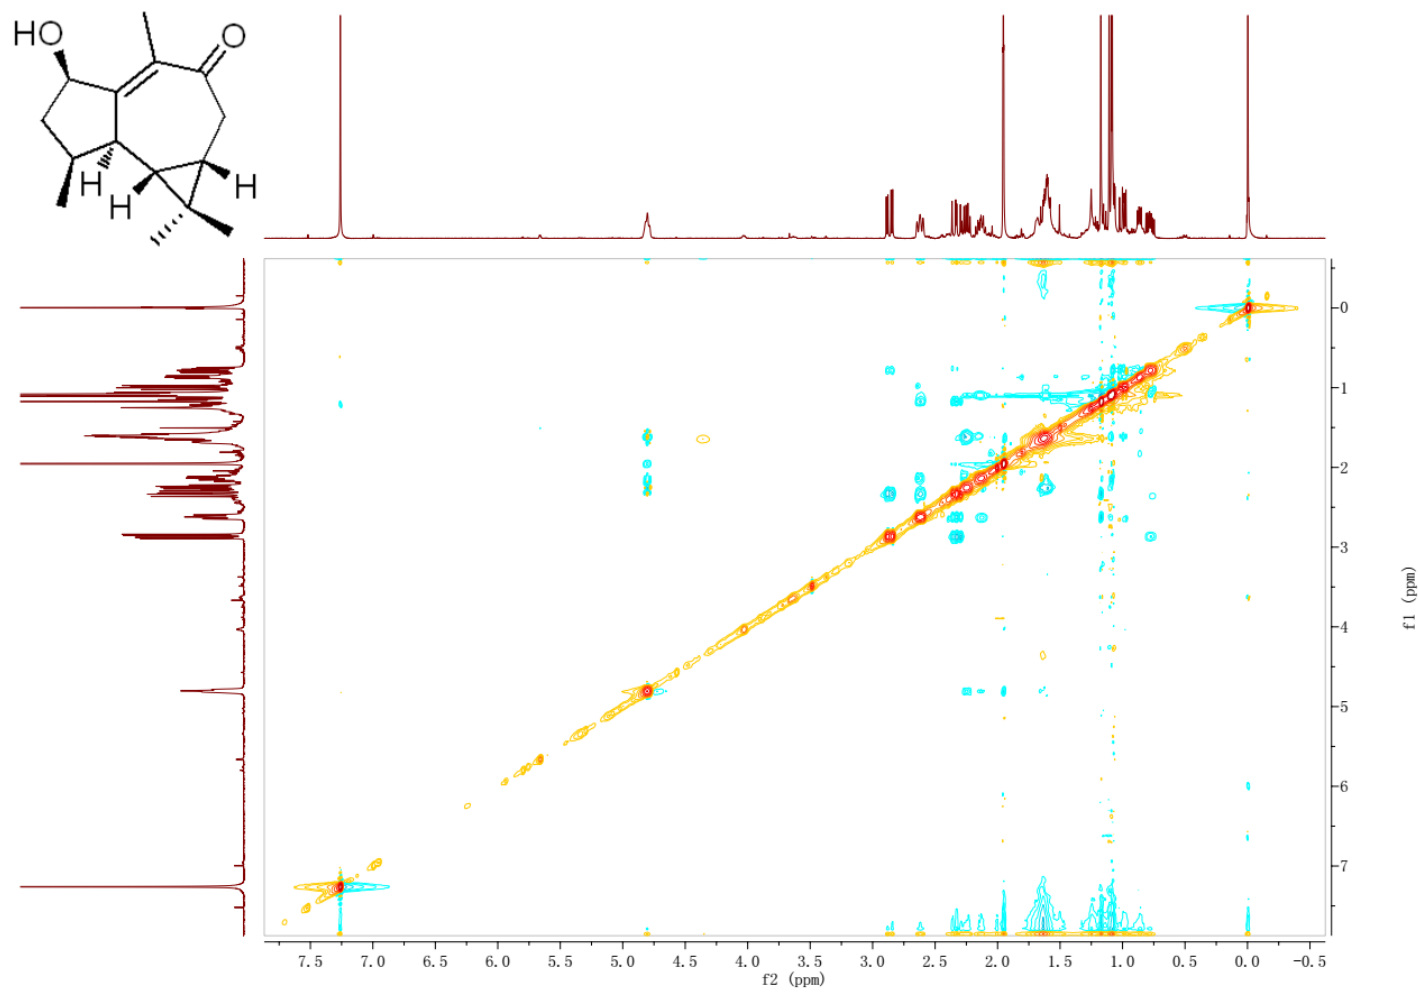

Figure S56. HR-ESI-MS spectrum of scedogiine G (9)

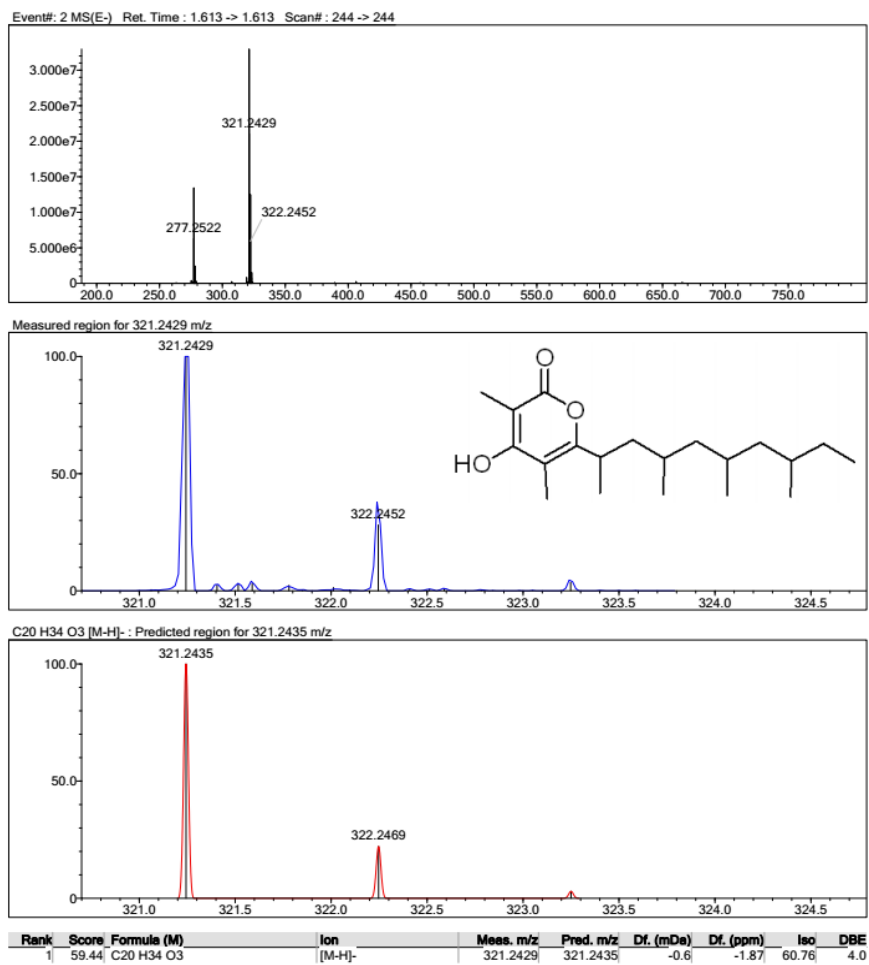

Figure S57. <sup>1</sup>H-NMR spectrum of scedogiine G (9) in CDCl<sub>3</sub> (400MHz)

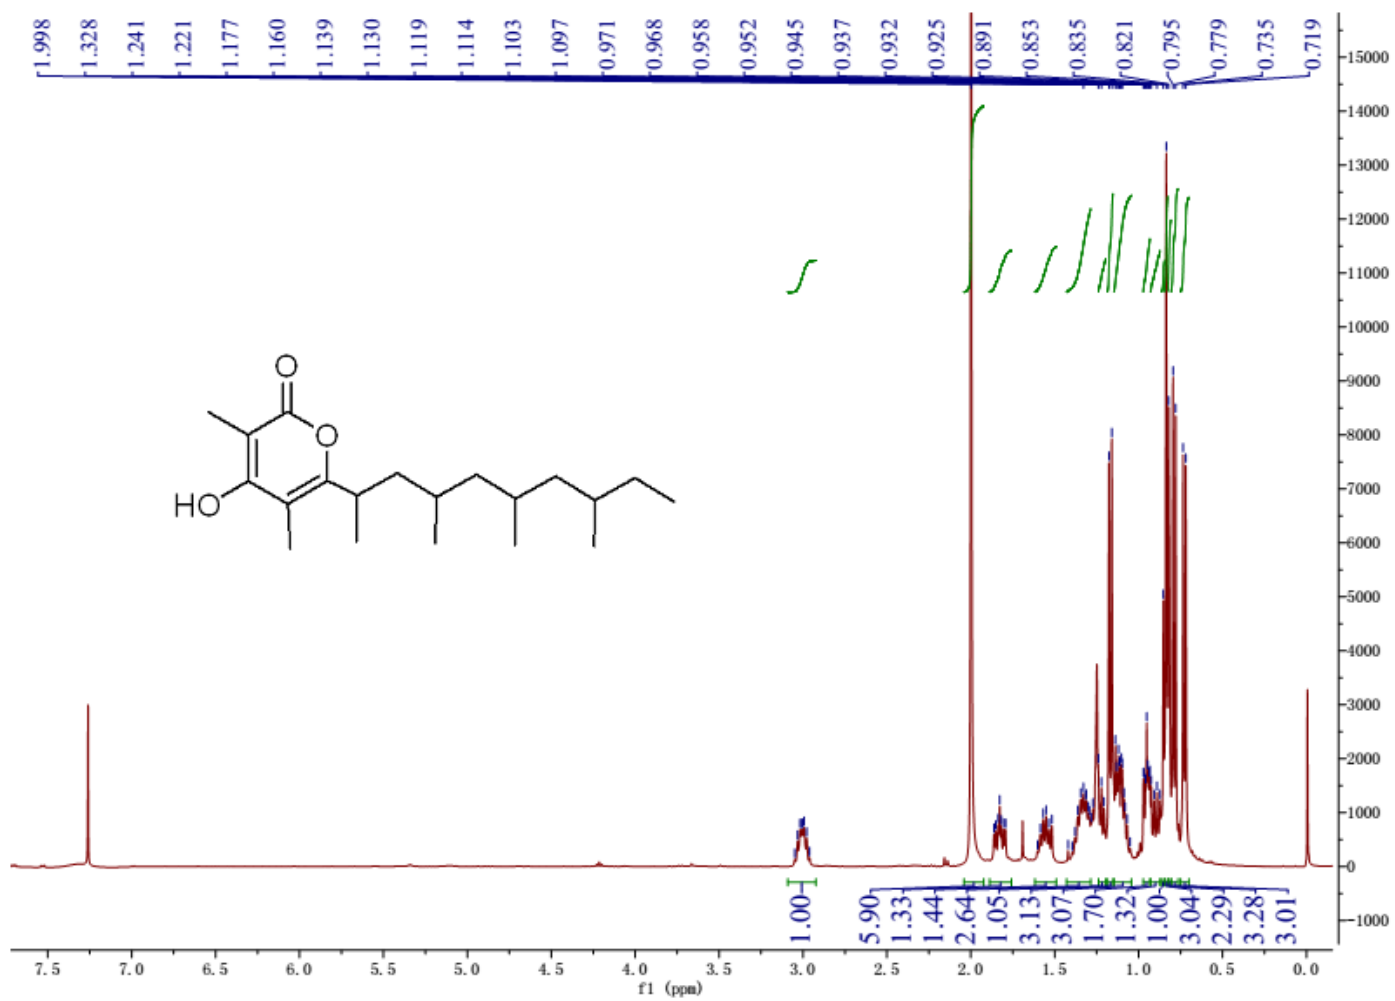





Figure S60. HMQC spectrum of scedogine G (9) in CDCl<sub>3</sub>

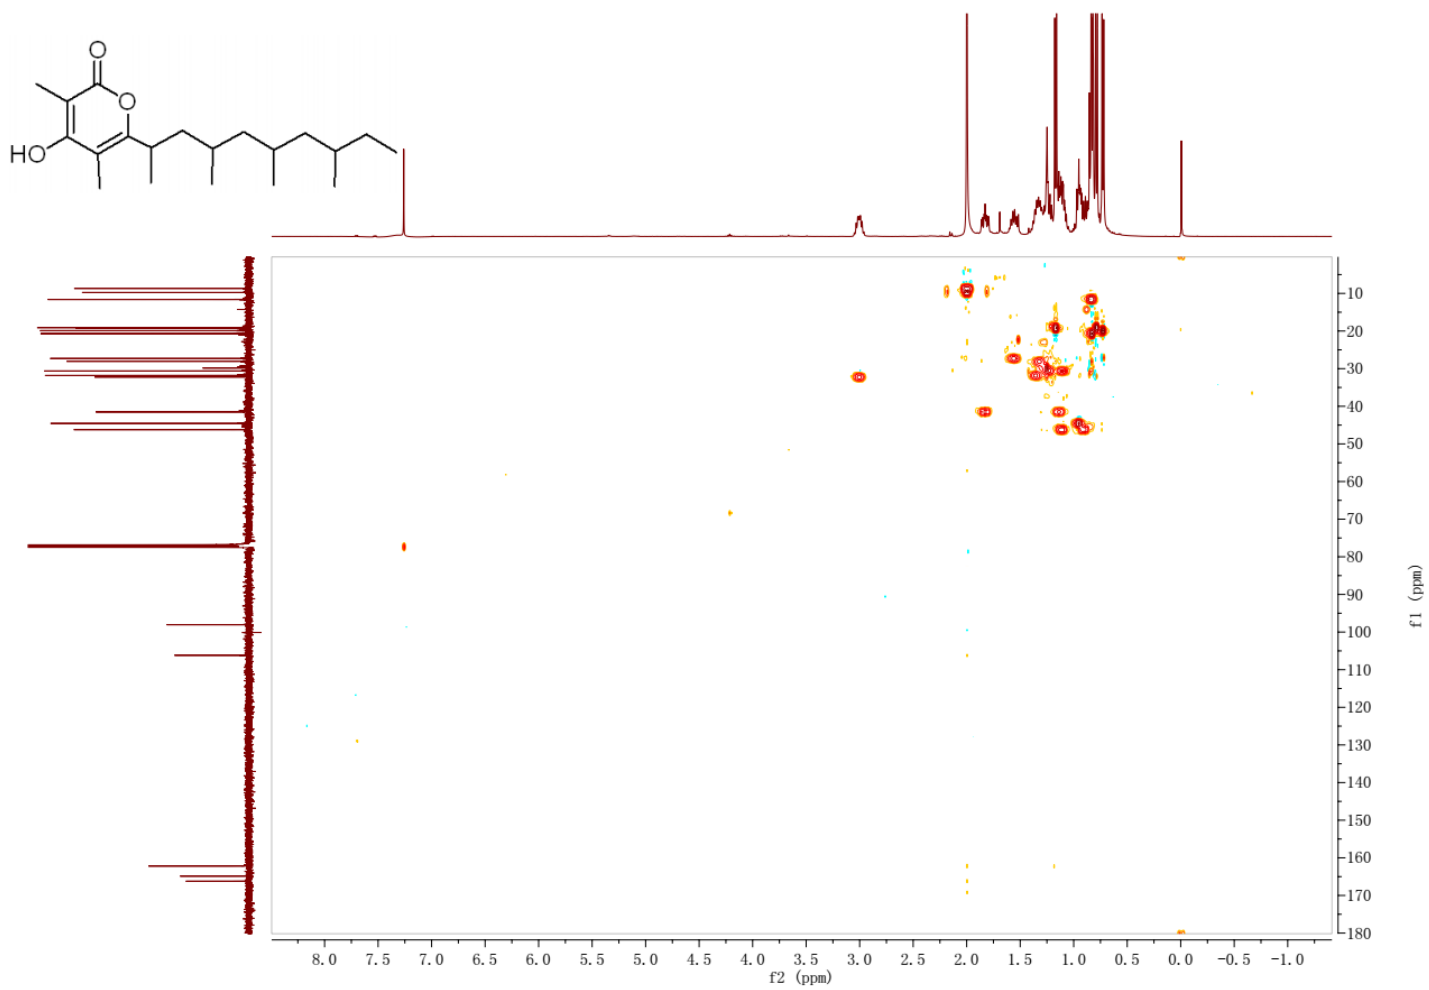

**Figure S61.**  $^1\text{H}$ - $^1\text{H}$  COSY spectrum of scedogine G (**9**) in  $\text{CDCl}_3$

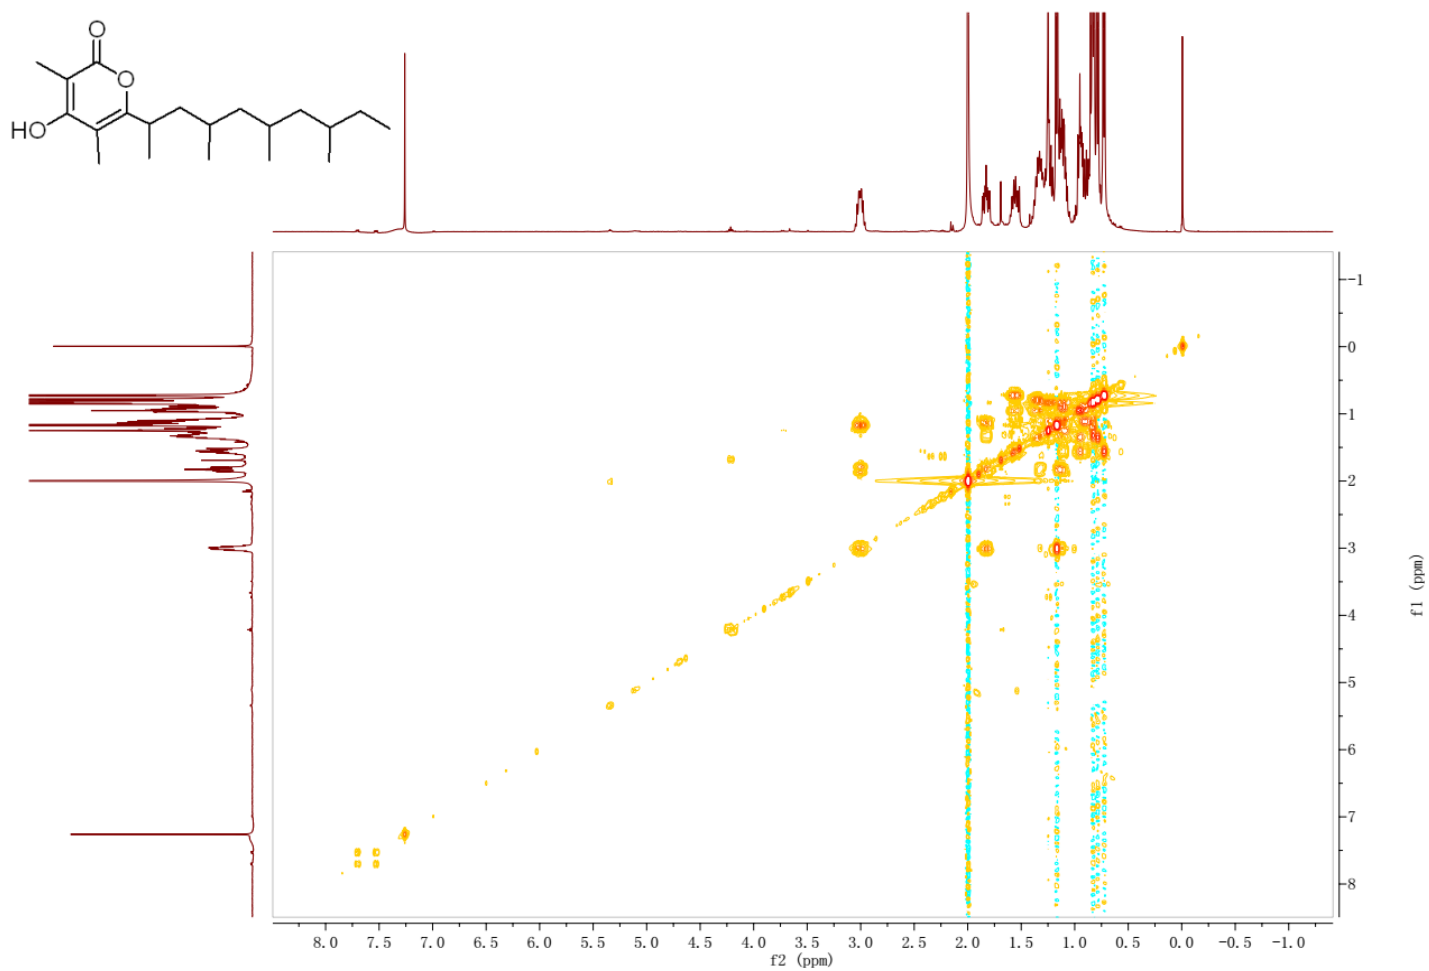

Figure S62. HMBC spectrum of scedogine G (9) in CDCl<sub>3</sub>

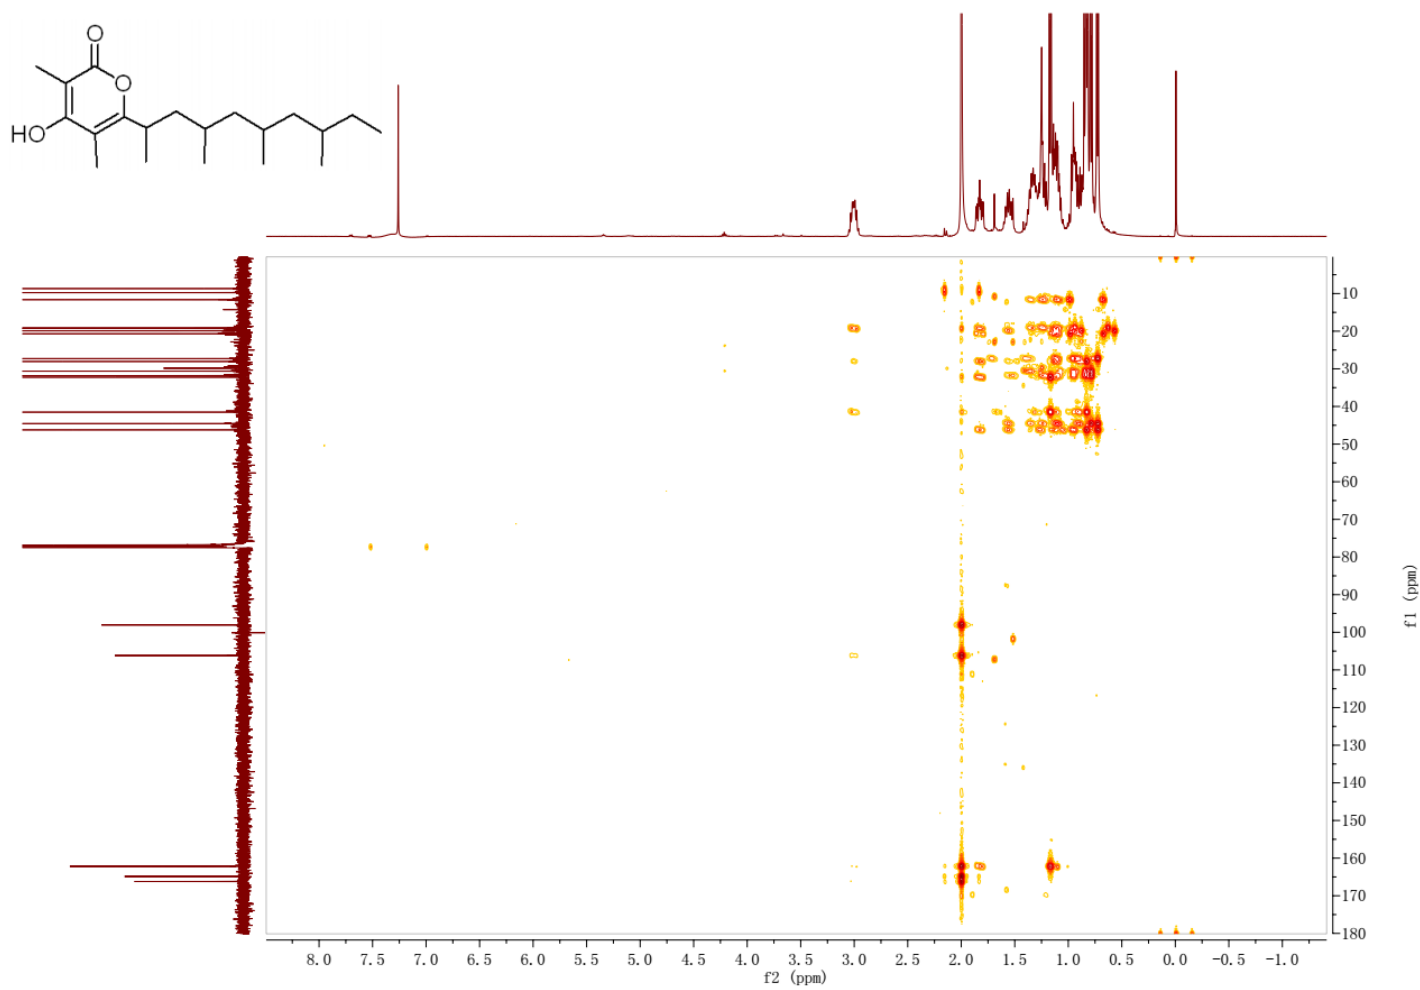



Figure S63. NOESY spectrum of scedogiine G (9) in CDCl<sub>3</sub>

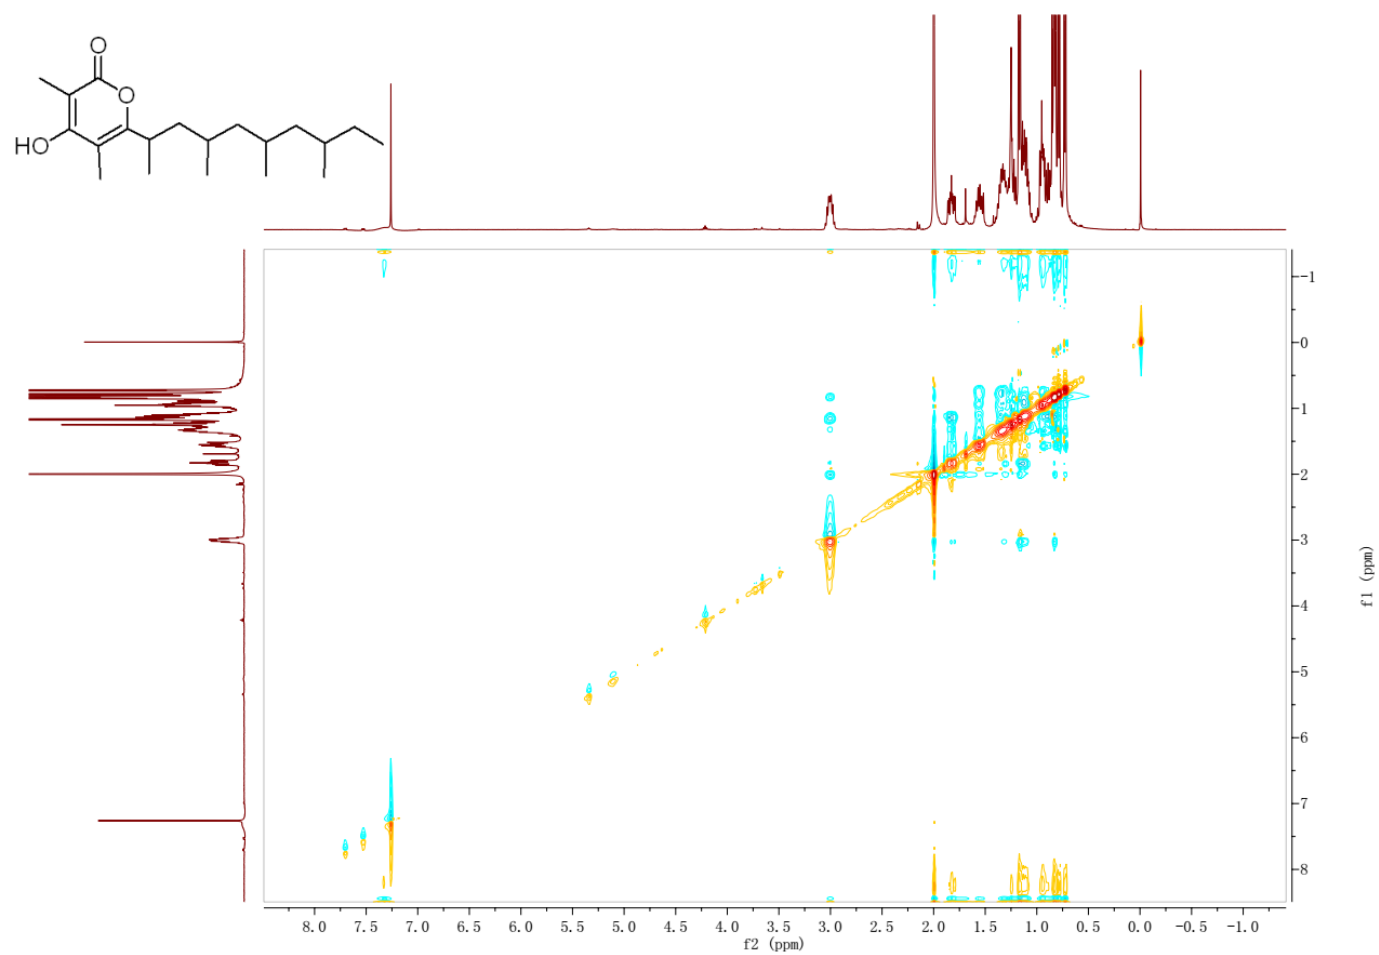

Supplement: c6ra21142a1.pdf [file c6ra21142a1.pdf]
